# Supplementary material for: Simple, catalytic C(sp3)–H azidation using the C–H donor as the limiting reagent
Source: Royal Society of Chemistry journal article supplement (doi:10.1039/d3cc04728h), 2024-01-01
Supplement: d3cc04728h1.pdf [file d3cc04728h1.pdf]

## Supporting Information

### Simple, Catalytic C(sp<sup>3</sup>)–H Azidation Using the C–H Donor as the Limiting Reagent

James F. Hooson, Hai N. Tran, Kang-jie Bian, Julian G. West\*

#### Table of Contents

|                                                            |    |
|------------------------------------------------------------|----|
| General Information.....                                   | 2  |
| Screening cyclooctane with TMS-N <sub>3</sub> .....        | 3  |
| Screening <i>n</i> -octane with TMS-N <sub>3</sub> .....   | 17 |
| Screening 1-chloroadamantane with TMS-N <sub>3</sub> ..... | 21 |
| Screening cyclooctane with NaN <sub>3</sub> .....          | 31 |
| Screening cycloheptanone with TMS-N <sub>3</sub> .....     | 32 |
| Reaction Scope.....                                        | 34 |
| Application.....                                           | 53 |
| NMRs.....                                                  | 54 |
| Supporting information References.....                     | 98 |

## General Information

All reagents were purchased from commercially available sources without further purification. All reactions were carried out in an oven dried vial with a magnetic stirring bar under N<sub>2</sub> atmosphere.

<sup>1</sup>H-NMR and <sup>13</sup>C{<sup>1</sup>H}-NMR spectra were performed on a Bruker DRX-600 spectrometer operating at 600 MHz for proton nuclei and 151 MHz for carbon were calibrated using residual undeuterated solvent as an internal reference (CDCl<sub>3</sub>: 7.26 ppm <sup>1</sup>H-NMR and 77.20 ppm <sup>13</sup>C{<sup>1</sup>H}-NMR).

For reporting NMR peak multiplicities, the following abbreviations were used: s = singlet, d = doublet, t = triplet, q = quartet, quin = quintet, hept = heptet, m = multiplet, br = broad.

**CAUTION: Azides are potentially explosive compounds; Extreme caution is necessary and proper safety measures should be taken.**

Organic azides with (NC + NO)/NN ratio more than 3 are normally stable and can be isolated and stored in pure form. Azides with (NC + NO)/NN less than 3 but more than 1 can be isolated but should be stored in fridge at no more than 1 M concentration and at a maximum of 5 grams of material. Azides with (NC + NO)/NN < 1 should never be isolated, as they are very unstable and potentially explosive.

## Mn Catalyst Screening for the Azidation of Cyclooctane

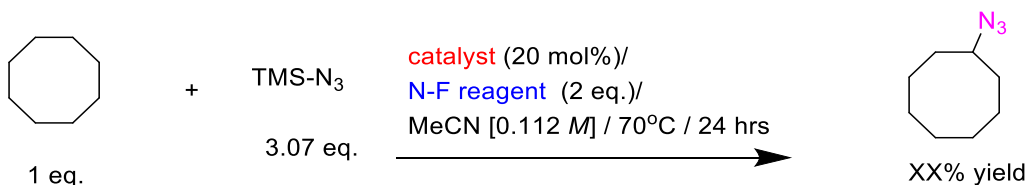

| N-F reagent | Mn catalyst                            | Yield of azidocyclooctane                 |
|-------------|----------------------------------------|-------------------------------------------|
| Selectfluor | Mn(OAc) <sub>3</sub> 2H <sub>2</sub> O | 38%                                       |
| NFSI        | Mn(OAc) <sub>3</sub> 2H <sub>2</sub> O | 5%                                        |
| Selectfluor | [Mn(TPP)Cl]                            | 3%                                        |
| NFSI        | [Mn(TPP)Cl]                            | trace                                     |
| Selectfluor | (S,S)-Jacobsen's catalyst              | 29%                                       |
| NFSI        | (S,S)-Jacobsen's catalyst              | 1%                                        |
| Selectfluor | MnF <sub>3</sub>                       | 39%                                       |
| NFSI        | MnF <sub>3</sub>                       | 8% (and 2% yield of fluorocyclooctane)    |
| Selectfluor | Mn(OAc) <sub>2</sub> 4H <sub>2</sub> O | 34%                                       |
| NFSI        | Mn(OAc) <sub>2</sub> 4H <sub>2</sub> O | trace (and 2% yield of fluorocyclooctane) |
| Selectfluor | MnBr <sub>2</sub>                      | 33% (and 16% yield of bromocyclooctane)   |
| NFSI        | MnBr <sub>2</sub>                      | none (and 20% yield of bromocyclooctane)  |
| Selectfluor | Mn(acac) <sub>3</sub>                  | 26%                                       |
| NFSI        | Mn(acac) <sub>3</sub>                  | 7% (and 17% yield of fluorocyclooctane)   |
| Selectfluor | Mn(acac) <sub>2</sub>                  | 37%                                       |
| NFSI        | Mn(acac) <sub>2</sub>                  | none                                      |
| Selectfluor | Mn(OTf) <sub>2</sub>                   | 35%                                       |
| NFSI        | Mn(OTf) <sub>2</sub>                   | 5% (and 30% yield of fluorocyclooctane)   |

[Mn(TPP)Cl] is (5,10,15,20-tetraphenylporphyrinato)manganese(III) chloride which is also known as 5,10,15,20-tetraphenyl-21*H*,23*H*-porphine manganese(III) chloride or Mn(III) *meso*-tetraphenylporphine chloride. (S,S)-Jacobsen's catalyst is (S,S)-(+)-*N,N'*-bis(3,5-di-*tert*-butylsalicylidene)-1,2-cyclohexanediaminomanganese(III) chloride.

**General procedure:** Cyclooctane (1 eq., 0.000446 mol = 0.446 mmol, 0.06 mL) was added to a vial with a stir bar followed by 4 mL MeCN. Next the catalyst (20 mol%, 0.0000892 mol = 0.0892 mmol) was added to the vial. Then, the TMS-N<sub>3</sub> (3.07 eq., 0.00137 mol = 1.37 mmol, 0.18 mL) was added to the vial and lastly the N-F reagent (2 eq., 0.000892 mol = 0.892 mmol) was added to the vial. The vial was sealed tightly and placed on to a pre-heated 70°C sand bath. The reaction was stirred vigorously for 24 hours. Then, the reaction was diluted with DCM and ran over a short silica pad, which was washed multiple times with DCM, and then concentrated on the rotary evaporator. The NMR yields were determined by using 1,3,5-trimethoxybenzene as an internal standard.

Azidocyclooctane (also known as cyclooctyl azide) has previously been characterized.<sup>[1,2]</sup> <sup>1</sup>H-NMR (600 MHz, CDCl<sub>3</sub>) δ 3.55 (tt, *J* = 8.5, 4.0 Hz, 1H), 1.89 – 1.84 (m, 2H), 1.74 – 1.66 (m, 4H), 1.57 – 1.46 (m, 8H).

Fluorocyclooctane has previously been characterized.<sup>[3]</sup> <sup>1</sup>H-NMR (600 MHz, CDCl<sub>3</sub>) δ 4.69 (dm, *J* = 48 Hz, 1H), 1.93 – 1.86 (m, 4H), 1.74 – 1.69 (m, 2H), 1.59 – 1.44 (m, 8H).

Bromocyclooctane (also known as cyclooctyl bromide) has previously been characterized.<sup>[4]</sup> <sup>1</sup>H-NMR (600 MHz, CDCl<sub>3</sub>) δ 4.44 – 4.39 (m, 1H), 2.25 – 2.19 (m 2H), 2.16 – 2.10 (m 2H), 1.78 – 1.70 (m, 2H), 1.61 – 1.45 (m, 8H).

## Fe Catalyst Screening for the Azidation of Cyclooctane

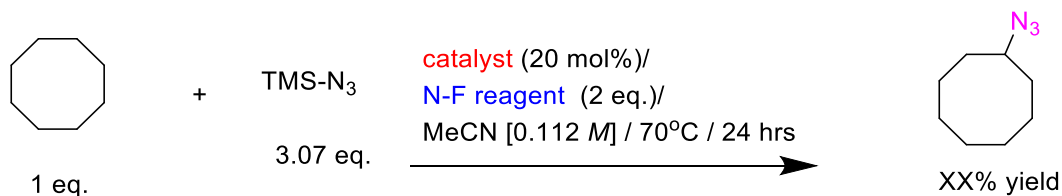

| N-F reagent        | Fe catalyst                                                       | Yield of azidocyclooctane                  |
|--------------------|-------------------------------------------------------------------|--------------------------------------------|
| Selectfluor        | FeCl <sub>3</sub> (anhydrous)                                     | 58% (and 13% yield of cyclooctyl chloride) |
| NFSI               | FeCl <sub>3</sub> (anhydrous)                                     | 34% (and 11% yield of cyclooctyl chloride) |
| Selectfluor        | FeCl <sub>3</sub> 6H <sub>2</sub> O                               | 52% (and 16% yield of cyclooctyl chloride) |
| NFSI               | FeCl <sub>3</sub> 6H <sub>2</sub> O                               | 43% (and 9% yield of cyclooctyl chloride)  |
| <b>Selectfluor</b> | <b>Fe(NO<sub>3</sub>)<sub>3</sub> 9H<sub>2</sub>O</b>             | <b>69%</b>                                 |
| NFSI               | Fe(NO <sub>3</sub> ) <sub>3</sub> 9H <sub>2</sub> O               | 37%                                        |
| Selectfluor        | Fe <sub>2</sub> (SO <sub>4</sub> ) <sub>3</sub> 5H <sub>2</sub> O | 4%                                         |
| NFSI               | Fe <sub>2</sub> (SO <sub>4</sub> ) <sub>3</sub> 5H <sub>2</sub> O | none                                       |
| Selectfluor        | Fe(III) oxalate 6H <sub>2</sub> O                                 | 15%                                        |
| NFSI               | Fe(III) oxalate 6H <sub>2</sub> O                                 | 43%                                        |
| <b>Selectfluor</b> | <b>Fe(OTf)<sub>3</sub></b>                                        | <b>69%</b>                                 |
| NFSI               | Fe(OTf) <sub>3</sub>                                              | 12%                                        |
| Selectfluor        | FeF <sub>3</sub>                                                  | 43%                                        |
| NFSI               | FeF <sub>3</sub>                                                  | 49%                                        |
| Selectfluor        | Fe(OAc) <sub>2</sub>                                              | 10%                                        |
| NFSI               | Fe(OAc) <sub>2</sub>                                              | 43%                                        |
| Selectfluor        | Fe(OTf) <sub>2</sub>                                              | 33%                                        |
| NFSI               | Fe(OTf) <sub>2</sub>                                              | trace                                      |
| Selectfluor        | FeCl <sub>2</sub>                                                 | 26% (and 5% yield of cyclooctyl chloride)  |
| NFSI               | FeCl <sub>2</sub>                                                 | 46% (and 10% yield of cyclooctyl chloride) |
| Selectfluor        | FeBr <sub>3</sub>                                                 | 26% (and 16% yield of bromocyclooctane)    |
| NFSI               | FeBr <sub>3</sub>                                                 | none (and 9% yield of bromocyclooctane)    |
| Selectfluor        | FeF <sub>2</sub>                                                  | 20%                                        |
| NFSI               | FeF <sub>2</sub>                                                  | 16%                                        |
| Selectfluor        | Fe <sub>2</sub> O <sub>3</sub>                                    | 3%                                         |
| NFSI               | Fe <sub>2</sub> O <sub>3</sub>                                    | none                                       |
| Selectfluor        | Fe(acac) <sub>2</sub>                                             | 12%                                        |
| NFSI               | Fe(acac) <sub>2</sub>                                             | none                                       |
| Selectfluor        | Fe(acac) <sub>3</sub>                                             | 8%                                         |
| NFSI               | Fe(acac) <sub>3</sub>                                             | none                                       |



General procedure:

Cyclooctane (1 eq., 0.000446 mol = 0.446 mmol, 0.06 mL) was added to a vial with a stir bar followed by 4 mL MeCN. Next the catalyst (20 mol%, 0.0000892 mol = 0.0892 mmol) was added to the vial. Then, the TMS-N<sub>3</sub> (3.07 eq., 0.00137 mol = 1.37 mmol, 0.18 mL) was added to the vial and lastly the N-F reagent (2 eq., 0.000892 mol = 0.892 mmol) was added to the vial. The vial was sealed tightly and placed on to a pre-heated 70°C sand bath. The reaction was stirred vigorously for 24 hours. Then, the reaction was diluted with DCM and ran over a short silica pad, which was washed multiple times with DCM, and then concentrated on the rotary evaporator. The NMR yields were determined by using 1,3,5-trimethoxybenzene as an internal standard.

Azidocyclooctane (also known as cyclooctyl azide) has previously been characterized.<sup>[1,2]</sup> <sup>1</sup>H-NMR (600 MHz, CDCl<sub>3</sub>) δ 3.55 (tt, *J* = 8.5, 4.0 Hz, 1H), 1.89 – 1.84 (m, 2H), 1.74 – 1.66 (m, 4H), 1.57 – 1.46 (m, 8H).

Cyclooctyl chloride (also known as chlorocyclooctane) has previously been characterized.<sup>[5]</sup> <sup>1</sup>H NMR (600 MHz, CDCl<sub>3</sub>) δ 4.27 – 4.20 (m, 1H), 2.15 – 2.08 (m, 2H), 2.02 – 1.95 (m, 2H), 1.80 – 1.71 (m, 2H), 1.64 – 1.45 (m, 8H).

Bromocyclooctane (also known as cyclooctyl bromide) has previously been characterized.<sup>[4]</sup> <sup>1</sup>H-NMR (600 MHz, CDCl<sub>3</sub>) δ 4.44 – 4.39 (m, 1H), 2.25 – 2.19 (m 2H), 2.16 – 2.10 (m 2H), 1.78 – 1.70 (m, 2H), 1.61 – 1.45 (m, 8H).

## Screening Fe(NO<sub>3</sub>)<sub>3</sub> 9H<sub>2</sub>O with a Variety of Temperature or Light Conditions for the Azidation of Cyclooctane at 0.112 M in MeCN

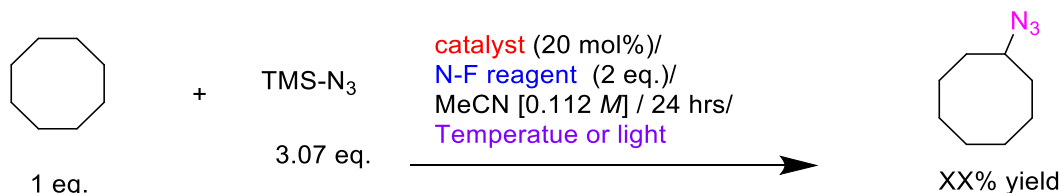

| Catalyst                                              | N-F reagent        | Temperature or light                             | Yield of azidocyclooctane |
|-------------------------------------------------------|--------------------|--------------------------------------------------|---------------------------|
| Fe(NO <sub>3</sub> ) <sub>3</sub> 9H <sub>2</sub> O   | Selectfluor        | RT                                               | 40%                       |
| <b>Fe(NO<sub>3</sub>)<sub>3</sub> 9H<sub>2</sub>O</b> | <b>Selectfluor</b> | <b>70°C</b>                                      | <b>69%</b>                |
| Fe(NO <sub>3</sub> ) <sub>3</sub> 9H <sub>2</sub> O   | Selectfluor        | RT, 40 W blue LEDs (390 nm, 1 cm, 25% intensity) | 57%                       |
| Fe(NO <sub>3</sub> ) <sub>3</sub> 9H <sub>2</sub> O   | NFSI               | RT                                               | Trace                     |
| Fe(NO <sub>3</sub> ) <sub>3</sub> 9H <sub>2</sub> O   | NFSI               | 70°C                                             | 37%                       |

### General procedure:

Cyclooctane (1 eq., 0.000446 mol = 0.446 mmol, 0.06 mL) was added to a vial with a stir bar followed by 4 mL MeCN. Next the catalyst (20 mol%, 0.0000892 mol = 0.0892 mmol) was added to the vial. Then, the TMS-N<sub>3</sub> (3.07 eq., 0.00137 mol = 1.37 mmol, 0.18 mL) was added to the vial and lastly the N-F reagent (2 eq., 0.000892 mol = 0.892 mmol) was added to the vial. The vial was sealed tightly and placed on/into the correct conditions regarding the temperature or light. The reaction was stirred vigorously for 24 hours. Then, the reaction was diluted with DCM and ran over a short silica pad, which was washed multiple times with DCM, and then concentrated on the rotary evaporator. The NMR yields were determined by using 1,3,5-trimethoxybenzene as an internal standard.

Azidocyclooctane (also known as cyclooctyl azide) has previously been characterized.<sup>[1,2]</sup> <sup>1</sup>H-NMR (600 MHz, CDCl<sub>3</sub>) δ 3.55 (tt, *J* = 8.5, 4.0 Hz, 1H), 1.89 – 1.84 (m, 2H), 1.74 – 1.66 (m, 4H), 1.57 – 1.46 (m, 8H).

## Screening Fe(OTf)<sub>3</sub> with a Variety of Temperature or Light Conditions for the Azidation of Cyclooctane at 0.112 M in MeCN

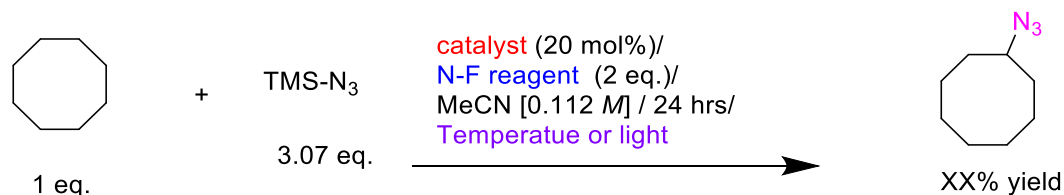

| Catalyst                   | N-F reagent        | Temperature or light | Yield of azidocyclooctane |
|----------------------------|--------------------|----------------------|---------------------------|
| Fe(OTf) <sub>3</sub>       | Selectfluor        | RT                   | 54%                       |
| <b>Fe(OTf)<sub>3</sub></b> | <b>Selectfluor</b> | <b>70°C</b>          | <b>69%</b>                |
| Fe(OTf) <sub>3</sub>       | NFSI               | RT                   | 4%                        |
| Fe(OTf) <sub>3</sub>       | NFSI               | 70°C                 | 12%                       |

### General procedure:

Cyclooctane (1 eq., 0.000446 mol = 0.446 mmol, 0.06 mL) was added to a vial with a stir bar followed by 4 mL MeCN. Next the catalyst (20 mol%, 0.0000892 mol = 0.0892 mmol) was added to the vial. Then, the TMS-N<sub>3</sub> (3.07 eq., 0.00137 mol = 1.37 mmol, 0.18 mL) was added to the vial and lastly the N-F reagent (2 eq., 0.000892 mol = 0.892 mmol) was added to the vial. The vial was sealed tightly and placed on/into the correct conditions regarding the temperature or light. The reaction was stirred vigorously for 24 hours. Then, the reaction was diluted with DCM and ran over a short silica pad, which was washed multiple times with DCM, and then concentrated on the rotary evaporator. The NMR yields were determined by using 1,3,5-trimethoxybenzene as an internal standard.

Azidocyclooctane (also known as cyclooctyl azide) has previously been characterized.<sup>[1,2]</sup> <sup>1</sup>H-NMR (600 MHz, CDCl<sub>3</sub>) δ 3.55 (tt, *J* = 8.5, 4.0 Hz, 1H), 1.89 – 1.84 (m, 2H), 1.74 – 1.66 (m, 4H), 1.57 – 1.46 (m, 8H).

## Screening Fe(NO<sub>3</sub>)<sub>3</sub> 9H<sub>2</sub>O with a Variety of Temperature or Light Conditions for the Azidation of Cyclooctane at 0.223 M in MeCN

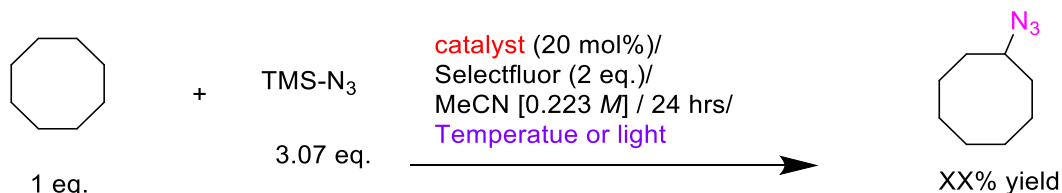

| Catalyst                                              | Temperature or light                                    | Yield of azidocyclooctane |
|-------------------------------------------------------|---------------------------------------------------------|---------------------------|
| Fe(NO <sub>3</sub> ) <sub>3</sub> 9H <sub>2</sub> O   | RT                                                      | 28%                       |
| <b>Fe(NO<sub>3</sub>)<sub>3</sub> 9H<sub>2</sub>O</b> | <b>RT, 40 W blue LEDs (390 nm, 1 cm, 25% intensity)</b> | <b>66%</b>                |
| Fe(NO <sub>3</sub> ) <sub>3</sub> 9H <sub>2</sub> O   | RT, 40 W blue LEDs (427 nm, 1 cm, 25% intensity)        | 41%                       |
| <b>Fe(NO<sub>3</sub>)<sub>3</sub> 9H<sub>2</sub>O</b> | <b>70°C</b>                                             | <b>71%</b>                |

### General procedure:

Cyclooctane (1 eq., 0.000446 mol = 0.446 mmol, 0.06 mL) was added to a vial with a stir bar followed by 4 mL MeCN. Next the catalyst (20 mol%, 0.0000892 mol = 0.0892 mmol) was added to the vial. Then, the TMS-N<sub>3</sub> (3.07 eq., 0.00137 mol = 1.37 mmol, 0.18 mL) was added to the vial and lastly the Selectfluor (2 eq., 0.000892 mol = 0.892 mmol, 316 mg) was added to the vial. The vial was sealed tightly and placed into the correct conditions regarding the temperature or light. The reaction was stirred vigorously for 24 hours. Then, the reaction was diluted with DCM and ran over a short silica pad, which was washed multiple times with DCM, and then concentrated on the rotary evaporator. The NMR yields were determined by using 1,3,5-trimethoxybenzene as an internal standard.

Azidocyclooctane (also known as cyclooctyl azide) has previously been characterized.<sup>[1,2]</sup> <sup>1</sup>H-NMR (600 MHz, CDCl<sub>3</sub>) δ 3.55 (tt, *J* = 8.5, 4.0 Hz, 1H), 1.89 – 1.84 (m, 2H), 1.74 – 1.66 (m, 4H), 1.57 – 1.46 (m, 8H).

## Screening Fe(OTf)<sub>3</sub> with a Variety of Temperature or Light Conditions for the Azidation of Cyclooctane at 0.223 M in MeCN

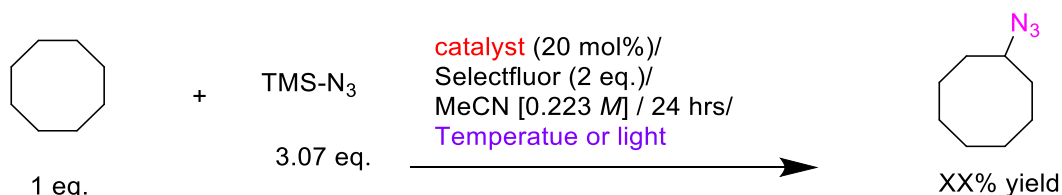

| Catalyst             | Temperature or light                             | Yield of azidocyclooctane |
|----------------------|--------------------------------------------------|---------------------------|
| Fe(OTf) <sub>3</sub> | RT                                               | 52%                       |
| Fe(OTf) <sub>3</sub> | RT, 40 W blue LEDs (390 nm, 1 cm, 25% intensity) | 51%                       |
| Fe(OTf) <sub>3</sub> | RT, 40 W blue LEDs (427 nm, 1 cm, 25% intensity) | 48%                       |
| Fe(OTf) <sub>3</sub> | 70°C                                             | 69%                       |

### General procedure:

Cyclooctane (1 eq., 0.000446 mol = 0.446 mmol, 0.06 mL) was added to a vial with a stir bar followed by 4 mL MeCN. Next the catalyst (20 mol%, 0.0000892 mol = 0.0892 mmol) was added to the vial. Then, the TMS-N<sub>3</sub> (3.07 eq., 0.00137 mol = 1.37 mmol, 0.18 mL) was added to the vial and lastly the Selectfluor (2 eq., 0.000892 mol = 0.892 mmol, 316 mg) was added to the vial. The vial was sealed tightly and placed into the correct conditions regarding the temperature or light. The reaction was stirred vigorously for 24 hours. Then, the reaction was diluted with DCM and ran over a short silica pad, which was washed multiple times with DCM, and then concentrated on the rotary evaporator. The NMR yields were determined by using 1,3,5-trimethoxybenzene as an internal standard.

Azidocyclooctane (also known as cyclooctyl azide) has previously been characterized.<sup>[1,2]</sup> <sup>1</sup>H-NMR (600 MHz, CDCl<sub>3</sub>) δ 3.55 (tt, *J* = 8.5, 4.0 Hz, 1H), 1.89 – 1.84 (m, 2H), 1.74 – 1.66 (m, 4H), 1.57 – 1.46 (m, 8H).

## Screening the amount of $\text{Fe}(\text{NO}_3)_3 \cdot 9\text{H}_2\text{O}$ for the Azidation of Cyclooctane

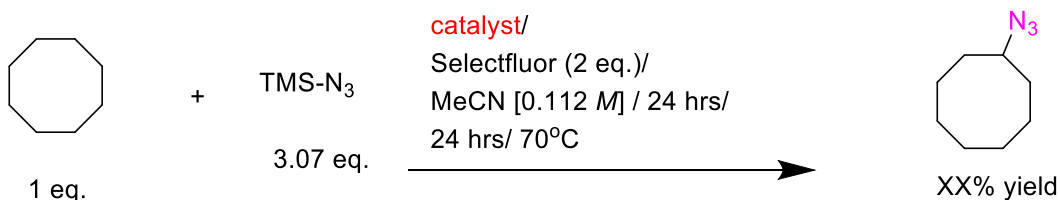

| Catalyst                                             | Amount of catalyst | Yield of azidocyclooctane |
|------------------------------------------------------|--------------------|---------------------------|
| $\text{Fe}(\text{NO}_3)_3 \cdot 9\text{H}_2\text{O}$ | 10 mol%            | 50%                       |
| $\text{Fe}(\text{NO}_3)_3 \cdot 9\text{H}_2\text{O}$ | 20 mol%            | 69%                       |
| $\text{Fe}(\text{NO}_3)_3 \cdot 9\text{H}_2\text{O}$ | 30 mol%            | 73%                       |

### General procedure:

Cyclooctane (1 eq., 0.000446 mol = 0.446 mmol, 0.06 mL) was added to a vial with a stir bar followed by 4 mL MeCN. Next the catalyst was added to the vial. Then, the TMS-N<sub>3</sub> (3.07 eq., 0.00137 mol = 1.37 mmol, 0.18 mL) was added to the vial and lastly the Selectfluor (2 eq., 0.000892 mol = 0.892 mmol, 316 mg) was added to the vial. The vial was sealed tightly and placed on to a pre-heated 70°C sand-bath. The reaction was stirred vigorously for 24 hours. Then, the reaction was diluted with DCM and ran over a short silica pad, which was washed multiple times with DCM, and then concentrated on the rotary evaporator. The NMR yields were determined by using 1,3,5-trimethoxybenzene as an internal standard.

Azidocyclooctane (also known as cyclooctyl azide) has previously been characterized.<sup>[1,2]</sup> <sup>1</sup>H-NMR (600 MHz, CDCl<sub>3</sub>)  $\delta$  3.55 (tt,  $J$  = 8.5, 4.0 Hz, 1H), 1.89 – 1.84 (m, 2H), 1.74 – 1.66 (m, 4H), 1.57 – 1.46 (m, 8H).

## Screening the amount of Fe(OTf)<sub>3</sub> for the Azidation of Cyclooctane

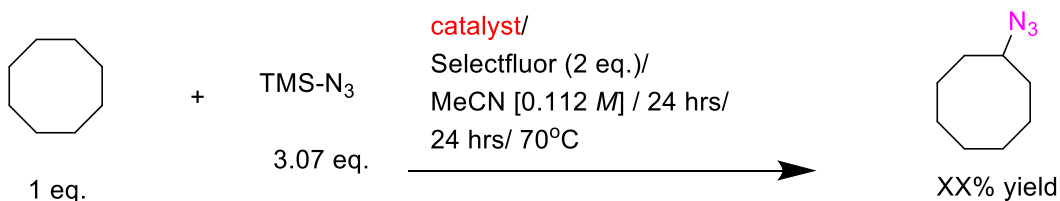

| Catalyst                   | Amount of catalyst | Yield of azidocyclooctane |
|----------------------------|--------------------|---------------------------|
| Fe(OTf) <sub>3</sub>       | 10 mol%            | 54%                       |
| <b>Fe(OTf)<sub>3</sub></b> | <b>20 mol%</b>     | <b>69%</b>                |
| <b>Fe(OTf)<sub>3</sub></b> | <b>30 mol%</b>     | <b>72%</b>                |

### General procedure:

Cyclooctane (1 eq., 0.000446 mol = 0.446 mmol, 0.06 mL) was added to a vial with a stir bar followed by 4 mL MeCN. Next the catalyst was added to the vial. Then, the TMS-N<sub>3</sub> (3.07 eq., 0.00137 mol = 1.37 mmol, 0.18 mL) was added to the vial and lastly the Selectfluor (2 eq., 0.000892 mol = 0.892 mmol, 316 mg) was added to the vial. The vial was sealed tightly and placed on to a pre-heated 70°C sand-bath. The reaction was stirred vigorously for 24 hours. Then, the reaction was diluted with DCM and ran over a short silica pad, which was washed multiple times with DCM, and then concentrated on the rotary evaporator. The NMR yields were determined by using 1,3,5-trimethoxybenzene as an internal standard.

Azidocyclooctane (also known as cyclooctyl azide) has previously been characterized.<sup>[1,2]</sup> <sup>1</sup>H-NMR (600 MHz, CDCl<sub>3</sub>) δ 3.55 (tt, *J* = 8.5, 4.0 Hz, 1H), 1.89 – 1.84 (m, 2H), 1.74 – 1.66 (m, 4H), 1.57 – 1.46 (m, 8H).

## Screening 20 mol% Fe(NO<sub>3</sub>)<sub>3</sub> 9H<sub>2</sub>O at 70°C with Selectfluor for the Azidation of Cyclooctane

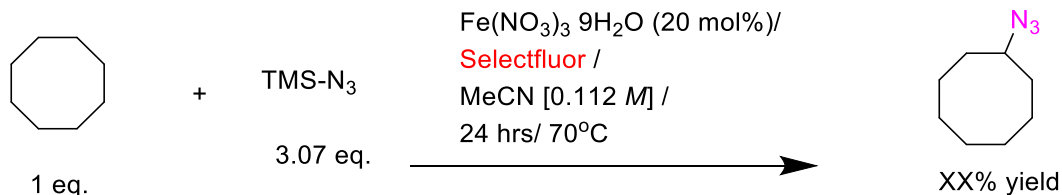

| Amount of Selectfluor | Yield of azidocyclooctane |
|-----------------------|---------------------------|
| (none)                | 17%                       |
| 1 eq.                 | 42%                       |
| 2 eq.                 | 69%                       |
| 3 eq.                 | 92%                       |

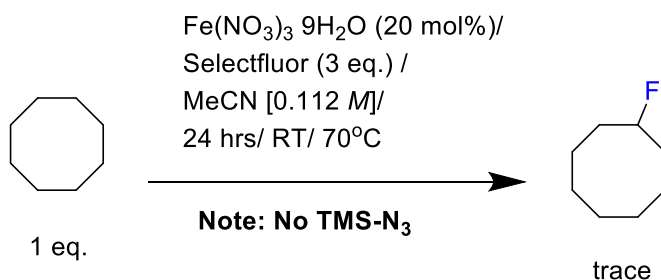

### General procedure:

Cyclooctane (1 eq., 0.000446 mol = 0.446 mmol, 0.06 mL) was added to a vial with a stir bar followed by 4 mL MeCN. Next the Fe(NO<sub>3</sub>)<sub>3</sub> 9H<sub>2</sub>O (20 mol%, 0.0000892 mol = 0.0892 mmol, 36 mg) was added to the vial. Then, **(if applicable)** the TMS-N<sub>3</sub> (3.07 eq., 0.00137 mol = 1.37 mmol, 0.18 mL) was added to the vial and lastly the Selectfluor was added to the vial. The vial was sealed tightly and placed on to a pre-heated 70°C sand-bath. The reaction was stirred vigorously for 24 hours. Then, the reaction was diluted with DCM and ran over a short silica pad, which was washed multiple times with DCM, and then concentrated on the rotary evaporator. The NMR yields were determined by using 1,3,5-trimethoxybenzene as an internal standard.

Azidocyclooctane (also known as cyclooctyl azide) has previously been characterized.<sup>[1,2]</sup> <sup>1</sup>H-NMR (600 MHz, CDCl<sub>3</sub>) δ 3.55 (tt, *J* = 8.5, 4.0 Hz, 1H), 1.89 – 1.84 (m, 2H), 1.74 – 1.66 (m, 4H), 1.57 – 1.46 (m, 8H).

Fluorocyclooctane has previously been characterized.<sup>[3]</sup> <sup>1</sup>H-NMR (600 MHz, CDCl<sub>3</sub>) δ 4.69 (dm, *J* = 48 Hz, 1H), 1.93 – 1.86 (m, 4H), 1.74 – 1.69 (m, 2H), 1.59 – 1.44 (m, 8H).



## Screening 20 mol% Fe(OTf)<sub>3</sub> at 70°C with Selectfluor for the Azidation of Cyclooctane

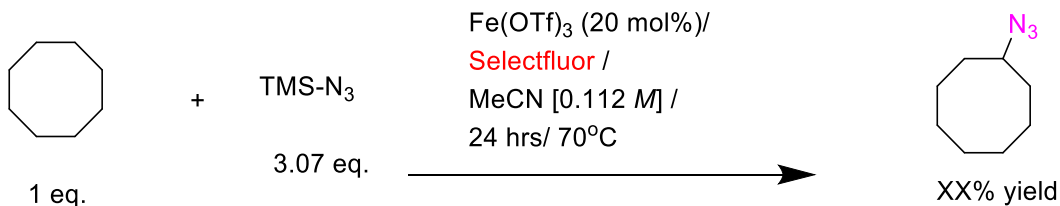

| Amount of Selectfluor | Yield of azidocyclooctane   |
|-----------------------|-----------------------------|
| (none)                | 6%                          |
| 1 eq.                 | 45%                         |
| 2 eq.                 | 69%                         |
| 3 eq.                 | 82%                         |
| 4 eq.                 | 74% (and 12% cyclooctanone) |

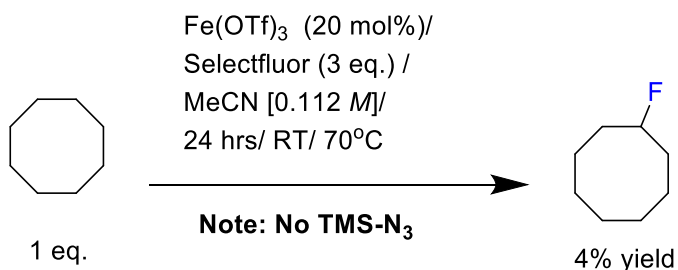

General procedure: Cyclooctane (1 eq., 0.000446 mol = 0.446 mmol, 0.06 mL) was added to a vial with a stir bar followed by 4 mL MeCN. Next the Fe(OTf)<sub>3</sub> (20 mol%, 0.0000892 mol = 0.0892 mmol, 44.9 mg) was added to the vial. Then, (**if applicable**) the TMS-N<sub>3</sub> (3.07 eq., 0.00137 mol = 1.37 mmol, 0.18 mL) was added to the vial and lastly the Selectfluor was added to the vial. The vial was sealed tightly and placed on to a pre-heated 70°C sand-bath. The reaction was stirred vigorously for 24 hours. Then, the reaction was diluted with DCM and ran over a short silica pad, which was washed multiple times with DCM, and then concentrated on the rotary evaporator. The NMR yields were determined by using 1,3,5-trimethoxybenzene as an internal standard.

Azidocyclooctane (also known as cyclooctyl azide) has previously been characterized.<sup>[1,2]</sup> <sup>1</sup>H-NMR (600 MHz, CDCl<sub>3</sub>) δ 3.55 (tt, *J* = 8.5, 4.0 Hz, 1H), 1.89 – 1.84 (m, 2H), 1.74 – 1.66 (m, 4H), 1.57 – 1.46 (m, 8H).

Fluorocyclooctane has previously been characterized.<sup>[3]</sup> <sup>1</sup>H-NMR (600 MHz, CDCl<sub>3</sub>) δ 4.69 (dm, *J* = 48 Hz, 1H), 1.93 – 1.86 (m, 4H), 1.74 – 1.69 (m, 2H), 1.59 – 1.44 (m, 8H).

Cyclooctanone has previously been characterized.<sup>[6]</sup> <sup>1</sup>H-NMR (600 MHz, CDCl<sub>3</sub>) δ 2.43 – 2.40 (m, 1H), 1.90 – 1.86 (m, 1H), 1.57 – 1.53 (m, 1H), 1.40 – 1.35 (m, 1H).

## Screening 20 mol% $\text{Fe}(\text{NO}_3)_3 \cdot 9\text{H}_2\text{O}$ under 390 nm LEDs with Selectfluor for the Azidation of Cyclooctane

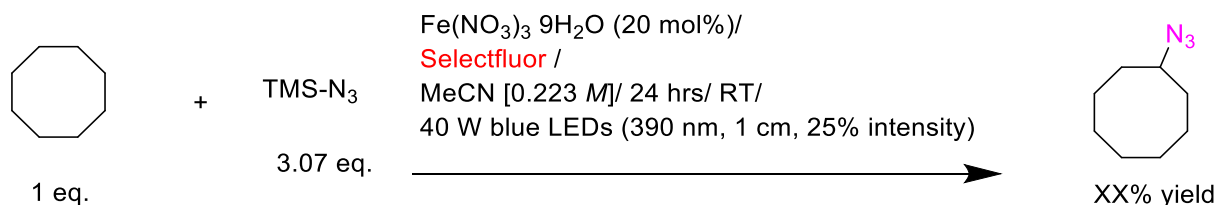

| Amount of Selectfluor | Yield of azidocyclooctane   |
|-----------------------|-----------------------------|
| (none)                | 31%                         |
| 1 eq.                 | 58%                         |
| 2 eq.                 | 66%                         |
| 3 eq.                 | 68% (and 18% cyclooctanone) |

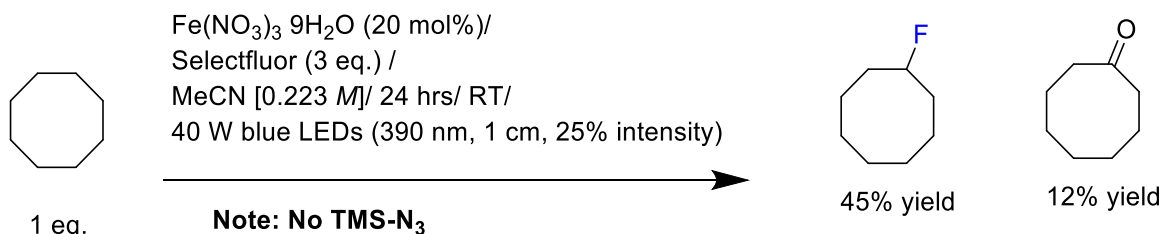

### General procedure:

Cyclooctane (1 eq., 0.000446 mol = 0.446 mmol, 0.06 mL) was added to a vial with a stir bar followed by 2 mL MeCN. Next the  $\text{Fe}(\text{NO}_3)_3 \cdot 9\text{H}_2\text{O}$  (20 mol%, 0.0000892 mol = 0.0892 mmol, 36 mg) was added to the vial. Then, **(if applicable)** the TMS- $\text{N}_3$  (3.07 eq., 0.00137 mol = 1.37 mmol, 0.18 mL) was added to the vial and lastly the Selectfluor was added to the vial. The vial was sealed tightly and placed 1 cm from 40 W Blue LEDs (390 nm, 25% intensity). The reaction was stirred vigorously for 24 hours. Then, the reaction was diluted with DCM and ran over a short silica pad, which was washed multiple times with DCM, and then concentrated on the rotary evaporator. The NMR yields were determined by using 1,3,5-trimethoxybenzene as an internal standard.

Azidocyclooctane (also known as cyclooctyl azide) has previously been characterized.<sup>[1,2]</sup>  $^1\text{H}$ -NMR (600 MHz,  $\text{CDCl}_3$ )  $\delta$  3.55 (tt,  $J$  = 8.5, 4.0 Hz, 1H), 1.89 – 1.84 (m, 2H), 1.74 – 1.66 (m, 4H), 1.57 – 1.46 (m, 8H).

Fluorocyclooctane has previously been characterized.<sup>[3]</sup>  $^1\text{H}$ -NMR (600 MHz,  $\text{CDCl}_3$ )  $\delta$  4.69 (dm,  $J$  = 48 Hz, 1H), 1.93 – 1.86 (m, 4H), 1.74 – 1.69 (m, 2H), 1.59 – 1.44 (m, 8H).

Cyclooctanone has previously been characterized.<sup>[6]</sup>  $^1\text{H}$ -NMR (600 MHz,  $\text{CDCl}_3$ )  $\delta$  2.43 – 2.40 (m, 1H), 1.90 – 1.86 (m, 1H), 1.57 – 1.53 (m, 1H), 1.40 – 1.35 (m, 1H).

### Screening a Variety of Catalysts and 3 eq. Selectfluor for the Azidation of Cyclooctane

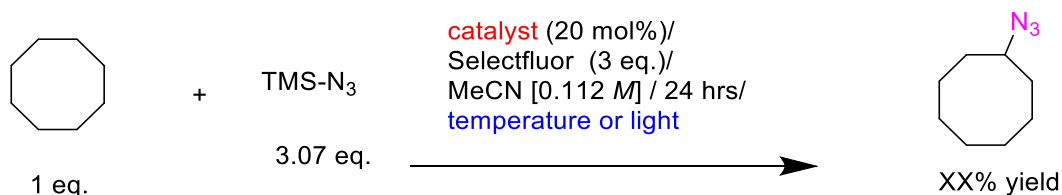

| Catalyst<br>(20 mol%)                                                                      | Temperature or light                                     | Yield of azidocyclooctane                         |
|--------------------------------------------------------------------------------------------|----------------------------------------------------------|---------------------------------------------------|
| <b>Fe(NO<sub>3</sub>)<sub>3</sub> 9H<sub>2</sub>O</b>                                      | <b>70°C</b>                                              | <b>92%</b>                                        |
| <b>Fe(NO<sub>3</sub>)<sub>3</sub> 9H<sub>2</sub>O*</b>                                     | <b>RT, 40 W blue LEDs (390 nm, 1 cm, 25% intensity)*</b> | <b>68%*</b>                                       |
| <b>Fe(OTf)<sub>3</sub></b>                                                                 | <b>70°C</b>                                              | <b>82%</b>                                        |
| <b>FeF<sub>3</sub></b>                                                                     | <b>70°C</b>                                              | <b>65%</b>                                        |
| FeBr <sub>3</sub>                                                                          | 70°C                                                     | 40% (and 20% yield of bromocyclooctane)           |
| FeF <sub>2</sub>                                                                           | 70°C                                                     | 36%                                               |
| <b>Fe(acac)<sub>2</sub></b>                                                                | <b>70°C</b>                                              | <b>64%</b>                                        |
| <b>FeCl<sub>2</sub></b>                                                                    | <b>70°C</b>                                              | <b>76% (and 12% yield of cyclooctyl chloride)</b> |
| <b>Fe(OAc)<sub>2</sub></b>                                                                 | <b>70°C</b>                                              | <b>67%</b>                                        |
| <b>Fe(OTf)<sub>2</sub></b>                                                                 | <b>70°C</b>                                              | <b>62%</b>                                        |
| MnBr <sub>2</sub>                                                                          | 70°C                                                     | 44% (and 16% yield of bromocyclooctane)           |
| <b>Mn(OAc)<sub>2</sub> 4H<sub>2</sub>O</b>                                                 | <b>70°C</b>                                              | <b>67%</b>                                        |
| Mn(OAc) <sub>3</sub> 2H <sub>2</sub> O                                                     | 70°C                                                     | 53%                                               |
| <b>MnF<sub>3</sub></b>                                                                     | <b>70°C</b>                                              | <b>61%</b>                                        |
| Mn(OTf) <sub>2</sub>                                                                       | 70°C                                                     | 50%                                               |
| (none)                                                                                     | 70°C                                                     | 28%                                               |
| (none)*                                                                                    | RT, 40 W blue LEDs (390 nm, 1 cm, 25% intensity)*        | 22%*                                              |
| Mn(OAc) <sub>3</sub> 4H <sub>2</sub> O<br>(5 mol%) and<br>BPhen (5 mol%)                   | 70°C                                                     | 37%                                               |
| Mn(OAc) <sub>3</sub> 4H <sub>2</sub> O<br>(20 mol%) and<br>4,4'-dimethyl-bipy<br>(20 mol%) | 70°C                                                     | 56%                                               |

\*concentration is 0.223 M (with 2 mL MeCN) instead of 0.112 M

General procedure: Cyclooctane (1 eq., 0.000446 mol = 0.446 mmol, 0.06 mL) was added to a vial with a stir bar followed by 4 mL MeCN (for 0.112 M). Next the catalyst (20 mol%, 0.0000892 mol = 0.0892 mmol) was added to the vial. Then, the TMS-N<sub>3</sub> (3.07 eq., 0.00137 mol = 1.37 mmol, 0.18 mL) was added to the vial and lastly the Selectfluor (3 eq., 0.001338 mol = 1.338 mmol, 474 mg) was added to the vial. The vial was sealed tightly and placed on to a pre-heated 70°C sand bath. The reaction was stirred vigorously for 24 hours. Then, the reaction was diluted with DCM and ran over a short silica pad, which was washed multiple times with DCM, and then concentrated on the rotary evaporator. The NMR yields were determined by using 1,3,5-trimethoxybenzene as an internal standard.

Azidocyclooctane (also known as cyclooctyl azide) has previously been characterized.<sup>[1,2]</sup> <sup>1</sup>H-NMR (600 MHz, CDCl<sub>3</sub>) δ 3.55 (tt, *J* = 8.5, 4.0 Hz, 1H), 1.89 – 1.84 (m, 2H), 1.74 – 1.66 (m, 4H), 1.57 – 1.46 (m, 8H).

Cyclooctyl chloride (also known as chlorocyclooctane) has previously been characterized.<sup>[5]</sup> <sup>1</sup>H NMR (600 MHz, CDCl<sub>3</sub>) δ 4.27 – 4.20 (m, 1H), 2.15 – 2.08 (m, 2H), 2.02 – 1.95 (m, 2H), 1.80 – 1.71 (m, 2H), 1.64 – 1.45 (m, 8H).

Bromocyclooctane (also known as cyclooctyl bromide) has previously been characterized.<sup>[4]</sup> <sup>1</sup>H-NMR (600 MHz, CDCl<sub>3</sub>) δ 4.44 – 4.39 (m, 1H), 2.25 – 2.19 (m 2H), 2.16 – 2.10 (m 2H), 1.78 – 1.70 (m, 2H), 1.61 – 1.45 (m, 8H).

## Screening Catalysts in the Presence of Selectfluor for the Azidation of *n*-Octane

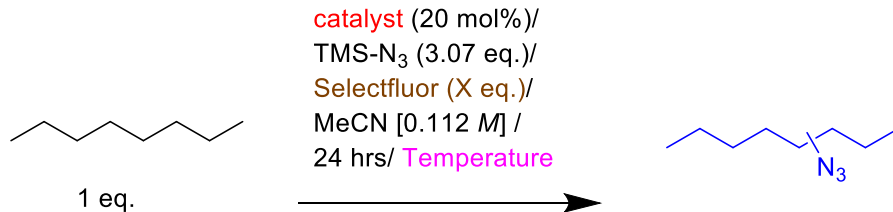

| Temp.       | Eq. of Selectfluor | catalyst                                             | Yield of azidation products: 2-azidooctane, 3-azidooctane, and 4-azidooctane |
|-------------|--------------------|------------------------------------------------------|------------------------------------------------------------------------------|
| RT          | 3                  | Fe(NO <sub>3</sub> ) <sub>3</sub> 9H <sub>2</sub> O  | 7%                                                                           |
| 70°C        | 3                  | Fe(NO <sub>3</sub> ) <sub>3</sub> 9H <sub>2</sub> O  | 31%                                                                          |
| RT          | 3                  | Fe(OTf) <sub>3</sub>                                 | 16%                                                                          |
| 70°C        | 3                  | <b>Fe(OTf)<sub>3</sub></b>                           | <b>35%</b>                                                                   |
| RT, 390 nm* | 3*                 | Fe(NO <sub>3</sub> ) <sub>3</sub> 9H <sub>2</sub> O* | 22%*                                                                         |
| RT, 390 nm* | 2*                 | Fe(NO <sub>3</sub> ) <sub>3</sub> 9H <sub>2</sub> O* | 22%*                                                                         |
| RT          | 3                  | Fe(OAc) <sub>2</sub>                                 | 5%                                                                           |
| 70°C        | 3                  | Fe(OAc) <sub>2</sub>                                 | 20%                                                                          |
| RT          | 3                  | Mn(OAc) <sub>2</sub> 4H <sub>2</sub> O               | 22%                                                                          |
| 70°C        | 3                  | <b>Mn(OAc)<sub>2</sub> 4H<sub>2</sub>O</b>           | <b>36%</b>                                                                   |
| RT          | 3                  | Mn(OAc) <sub>3</sub> 2H <sub>2</sub> O               | 28%                                                                          |
| 70°C        | 3                  | Mn(OAc) <sub>3</sub> 2H <sub>2</sub> O               | 30%                                                                          |
| RT          | 3                  | Fe(OTf) <sub>2</sub>                                 | 4%                                                                           |
| 70°C        | 3                  | <b>Fe(OTf)<sub>2</sub></b>                           | <b>35%</b>                                                                   |
| RT          | 3                  | (none)                                               | 5%                                                                           |
| 70°C        | 3                  | (none)                                               | 28%                                                                          |
| RT          | 3                  | ( <i>S,S</i> )-Jacobsen's catalyst                   | 19%                                                                          |
| 70°C        | 3                  | ( <i>S,S</i> )-Jacobsen's catalyst                   | 21%                                                                          |
| RT          | 3                  | MnF <sub>3</sub>                                     | 14%                                                                          |
| 70°C        | 3                  | MnF <sub>3</sub>                                     | 27%                                                                          |
| RT          | 3                  | FeF <sub>3</sub>                                     | 13%                                                                          |
| 70°C        | 3                  | FeF <sub>3</sub>                                     | 25%                                                                          |
| RT          | 3                  | Mn(OTf) <sub>2</sub>                                 | 20%                                                                          |
| 70°C        | 3                  | Mn(OTf) <sub>2</sub>                                 | 30%                                                                          |

\*concentration is 0.223 M (with 2 mL MeCN) instead of 0.112 M; 390 nm (40 W blue LEDs, 1 cm, 25% intensity)

General procedure:

*n*-Octane (1 eq., 0.000446 mol = 0.446 mmol, 0.051 g) was added to a vial with a stir bar followed by 4 mL MeCN. Next the catalyst (20 mol%, 0.0000892 mol = 0.0892 mmol) was added to the vial. Then, the TMS-N<sub>3</sub> (3.07 eq., 0.00137 mol = 1.37 mmol, 0.18 mL) was added to the vial and lastly Selectfluor (3 eq., 0.001338 mol = 1.338 mmol, 0.474 g) was added to the vial. The vial was sealed tightly and placed on/into the correct conditions regarding the temperature or light. The reaction was stirred vigorously for 24 hours. Then, the reaction was diluted with DCM and ran over a short silica pad, which was washed multiple times with DCM, and then concentrated on the rotary evaporator. The NMR yields were determined by using 1,3,5-trimethoxybenzene as an internal standard.

2-azidooctane, 3-azidooctane, and 4-azidooctane have all previously been characterized.<sup>[1,8]</sup> They are characterized here as an inseperable mixture. <sup>1</sup>H-NMR (600 MHz, CDCl<sub>3</sub>) δ 3.47 – 3.36 (m, 0.33H), 3.23 (m, 0.33H), 3.17 (m, 0.33H), 1.61 – 1.42 (m, 5H), 1.34 – 1.25 (m, 5H), 1.00 – 0.86 (m, 6H).

### Screening Conditions with Fe(OTf)<sub>2</sub> for the Azidation of *n*-Octane

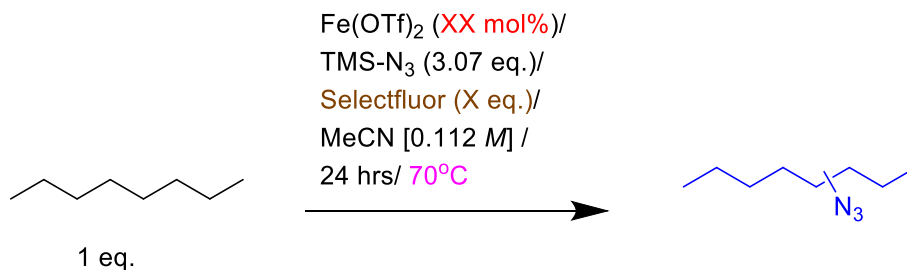

| Temp. | Eq. of Selectfluor | Amount of Fe(OTf) <sub>2</sub> | Yield of azidation products: 2-azidooctane, 3-azidooctane, and 4-azidooctane |
|-------|--------------------|--------------------------------|------------------------------------------------------------------------------|
| 70°C  | 3                  | 5 mol %                        | 36%                                                                          |
| 70°C  | 3                  | 10 mol %                       | 36%                                                                          |
| 70°C  | 3                  | 20 mol %                       | 35%                                                                          |
| 70°C  | 2                  | 20 mol %                       | 19%                                                                          |
| 70°C* | 4*                 | 20 mol %*                      | 33%*                                                                         |
| 70°C  | 3                  | 30 mol %                       | 35%                                                                          |

\*other changes besides 4 eq. Selectfluor are the concentration is 0.074 M (with 6 mL MecN) instead of 0.112 M and using 4.26 eq TMS-N<sub>3</sub> (with 0.0019 mol TMS-N<sub>3</sub>, 0.25 mL TMS-N<sub>3</sub>) instead of 3 eq. TMS-N<sub>3</sub>.

### Screening Conditions with Mn(OAc)<sub>2</sub> 4H<sub>2</sub>O for the Azidation of *n*-Octane

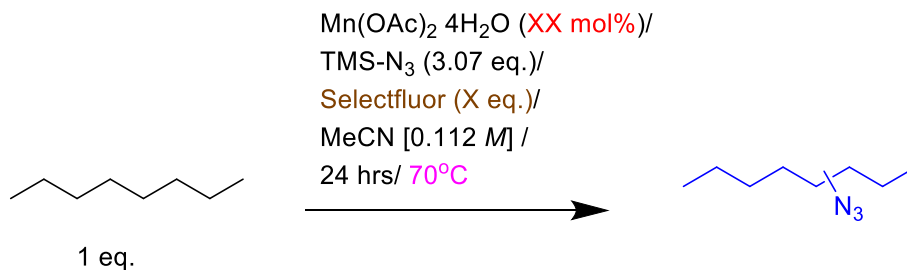

| Temp. | Eq. of Selectfluor | Amount of Mn(OAc) <sub>2</sub> 4H <sub>2</sub> O | Yield of azidation products: 2-azidooctane, 3-azidooctane, and 4-azidooctane |
|-------|--------------------|--------------------------------------------------|------------------------------------------------------------------------------|
| 70°C  | 3                  | 5 mol %                                          | 11%                                                                          |
| 70°C  | 3                  | 10 mol %                                         | 19%                                                                          |
| 70°C  | 3                  | 20 mol %                                         | 36%                                                                          |
| 70°C  | 2                  | 20 mol %                                         | 14%                                                                          |
| 70°C* | 4*                 | 20 mol %*                                        | 36%*                                                                         |
| 70°C  | 3                  | 30 mol %                                         | 30%                                                                          |

\*other changes besides 4 eq. Selectfluor are the concentration is 0.074 M (with 6 mL MecN) instead of 0.112 M and using 4.26 eq TMS-N<sub>3</sub> (with 0.0019 mol TMS-N<sub>3</sub>, 0.25 mL TMS-N<sub>3</sub>) instead of 3 eq. TMS-N<sub>3</sub>.

## Screening Conditions with Fe(OTf)<sub>3</sub> for the Azidation of *n*-Octane

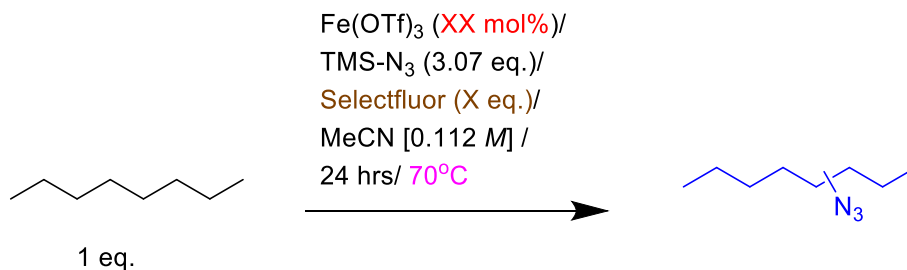

| Temp.       | Eq. of Selectfluor | Amount of Fe(OTf) <sub>3</sub> | Yield of azidation products: 2-azidooctane, 3-azidooctane, and 4-azidooctane |
|-------------|--------------------|--------------------------------|------------------------------------------------------------------------------|
| 70°C        | 3                  | 5 mol %                        | 35%                                                                          |
| 70°C        | 3                  | 10 mol %                       | 38%                                                                          |
| 70°C        | 3                  | 20 mol%                        | 35%                                                                          |
| <b>70°C</b> | <b>2</b>           | <b>20 mol%</b>                 | <b>42%</b>                                                                   |
| 70°C*       | 4*                 | 20 mol%*                       | 32%*                                                                         |
| <b>70°C</b> | <b>3</b>           | <b>30 mol%</b>                 | <b>43%</b>                                                                   |

\*other changes besides 4 eq. Selectfluor are the concentration is 0.074 M (with 6 mL MecN) instead of 0.112 M and using 4.26 eq TMS-N<sub>3</sub> (with 0.0019 mol TMS-N<sub>3</sub>, 0.25 mL TMS-N<sub>3</sub>) instead of 3 eq. TMS-N<sub>3</sub>.

2-azidooctane, 3-azidooctane, and 4-azidooctane have all previously been characterized.<sup>[1,8]</sup> They are characterized here as an inseperable mixture. <sup>1</sup>H-NMR (600 MHz, CDCl<sub>3</sub>) δ 3.47 – 3.36 (m, 0.33H), 3.23 (m, 0.33H), 3.17 (m, 0.33H), 1.61 – 1.42 (m, 5H), 1.34 – 1.25 (m, 5H), 1.00 – 0.86 (m, 6H).



## Screening Catalysts in the Presence of Selectfluor for the Azidation of 1-Chloroadamantane

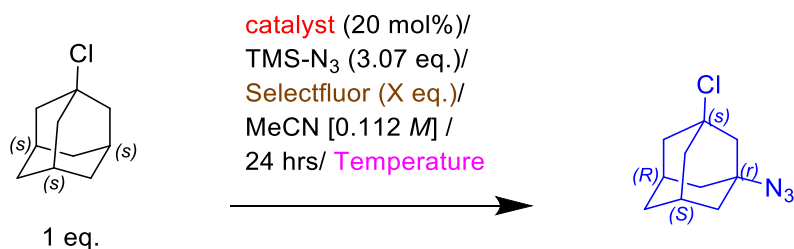

| Temp.<br>or light | Eq. of<br>Selectfluor | catalyst                                             | Yield of (1 <i>r</i> ,3 <i>s</i> ,5 <i>R</i> ,7 <i>S</i> )-1-azido-3-chloroadamantane |
|-------------------|-----------------------|------------------------------------------------------|---------------------------------------------------------------------------------------|
| RT                | 3                     | Fe(NO <sub>3</sub> ) <sub>3</sub> 9H <sub>2</sub> O  | 32%                                                                                   |
| 70°C              | 3                     | Fe(NO <sub>3</sub> ) <sub>3</sub> 9H <sub>2</sub> O  | 25%                                                                                   |
| RT                | 3                     | Fe(OTf) <sub>3</sub>                                 | 17%                                                                                   |
| 70°C              | 3                     | Fe(OTf) <sub>3</sub>                                 | 15%                                                                                   |
| RT, 390 nm*       | 3*                    | Fe(NO <sub>3</sub> ) <sub>3</sub> 9H <sub>2</sub> O* | 24%*                                                                                  |
| RT, 390 nm*       | 2*                    | Fe(NO <sub>3</sub> ) <sub>3</sub> 9H <sub>2</sub> O* | 24%*                                                                                  |
| RT                | 3                     | Fe(OAc) <sub>2</sub>                                 | 13%                                                                                   |
| 70°C              | 3                     | Fe(OAc) <sub>2</sub>                                 | 26%                                                                                   |
| RT                | 3                     | Mn(OAc) <sub>2</sub> 4H <sub>2</sub> O               | 50%                                                                                   |
| 70°C              | 3                     | Mn(OAc) <sub>2</sub> 4H <sub>2</sub> O               | 50%                                                                                   |
| RT                | 3                     | Mn(OAc) <sub>3</sub> 2H <sub>2</sub> O               | 50%                                                                                   |
| 70°C              | 3                     | Mn(OAc) <sub>3</sub> 2H <sub>2</sub> O               | 50%                                                                                   |
| RT                | 3                     | Fe(OTf) <sub>2</sub>                                 | 8%                                                                                    |
| 70°C              | 3                     | Fe(OTf) <sub>2</sub>                                 | 14%                                                                                   |
| RT                | 3                     | (none)                                               | 16%                                                                                   |
| 70°C              | 3                     | (none)                                               | 20%                                                                                   |
| RT                | 3                     | ( <i>S,S</i> )-Jacobsen's catalyst                   | 40%                                                                                   |
| 70°C              | 3                     | ( <i>S,S</i> )-Jacobsen's catalyst                   | 28%                                                                                   |
| RT                | 3                     | MnF <sub>3</sub>                                     | 38%                                                                                   |
| 70°C              | 3                     | MnF <sub>3</sub>                                     | 47%                                                                                   |
| RT                | 3                     | FeF <sub>3</sub>                                     | 40%                                                                                   |
| 70°C              | 3                     | FeF <sub>3</sub>                                     | 42%                                                                                   |
| RT                | 3                     | Mn(OTf) <sub>2</sub>                                 | 36%                                                                                   |
| 70°C              | 3                     | Mn(OTf) <sub>2</sub>                                 | 44%                                                                                   |
| RT                | 3 NFSI**              | Fe(OAc) <sub>2</sub>                                 | 5%                                                                                    |
| 70°C              | 3 NFSI**              | Fe(OAc) <sub>2</sub>                                 | 22%                                                                                   |

\*concentration is 0.223 M (with 2 mL MeCN) instead of 0.112 M; 390 nm (40 W blue LEDs, 1 cm, 25% intensity)

\*\*NFSI instead of Selectfluor

#### General procedure:

1-chloroadamantane (1 eq., 0.000446 mol = 0.446 mmol, 0.076 g) was added to a vial with a stir bar followed by 4 mL MeCN. Next the catalyst (20 mol%, 0.0000892 mol = 0.0892 mmol) was added to the vial. Then, the TMS-N<sub>3</sub> (3.07 eq., 0.00137 mol = 1.37 mmol, 0.18 mL) was added to the vial and lastly Selectfluor (3 eq., 0.001338 mol = 1.338 mmol, 0.474 g) was added to the vial. The vial was sealed tightly and placed on/into the correct conditions regarding the temperature or light. The reaction was stirred vigorously for 24 hours. Then, the reaction was diluted with DCM and ran over a short silica pad, which was washed multiple times with DCM, and then concentrated on the rotary evaporator. The NMR yields were determined by using 1,3,5-trimethoxybenzene as an internal standard.

(1*r*,3*s*,5*R*,7*S*)-1-azido-3-chloroadamantane has previously been characterized.<sup>[2]</sup> <sup>1</sup>H-NMR (600 MHz, CDCl<sub>3</sub>) δ 2.27 (s, 2H), 2.09 (s, 2H), 1.99 (q, *J* = 12.3 Hz, 4H), 1.70 (s, 3H), 1.53 (q, *J* = 12.0 Hz, 2H) 1.18 (s, br, 1H). <sup>13</sup>C{<sup>1</sup>H}-NMR (151 MHz, CDCl<sub>3</sub>) δ 66.5, 60.4, 51.1, 46.0, 39.8, 34.0, 31.8.

Screening Ligands (20 mol%) with Mn(OAc)<sub>2</sub> 4H<sub>2</sub>O (20 mol%) for the Azidation of 1-Chloroadamantane

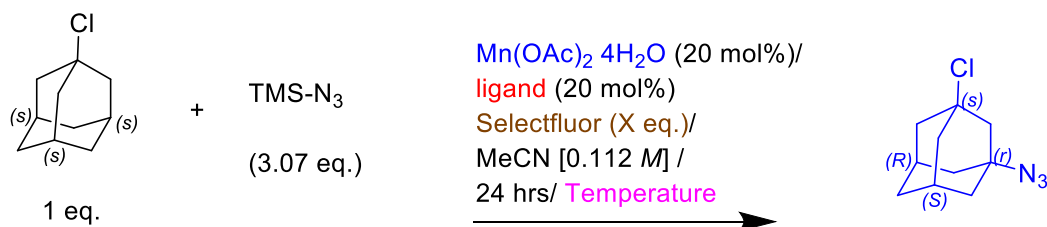

| Temperature | Equivalents of Selectfluor | Ligand (20 mol%) used with Mn(OAc) <sub>2</sub> 4H <sub>2</sub> O (20 mol%) | Yield of (1 <i>r</i> ,3 <i>s</i> ,5 <i>R</i> ,7 <i>S</i> )-1-azido-3-chloroadamantane |
|-------------|----------------------------|-----------------------------------------------------------------------------|---------------------------------------------------------------------------------------|
| RT          | 3                          | ethyl-salen                                                                 | 17%                                                                                   |
| 70°C        | 3                          | ethyl-salen                                                                 | 21%                                                                                   |
| RT          | 3                          | propyl-salen                                                                | 12%                                                                                   |
| 70°C        | 3                          | propyl-salen                                                                | 25%                                                                                   |
| RT          | 3                          | salphen                                                                     | 12%                                                                                   |
| 70°C        | 3                          | salphen                                                                     | 18%                                                                                   |
| RT          | 3                          | ( <i>S,S</i> )-Jacobsen's ligand                                            | 42%                                                                                   |
| 70°C        | 3                          | ( <i>S,S</i> )-Jacobsen's ligand                                            | 17%                                                                                   |
| RT          | 3                          | 2,2'-bipy                                                                   | 21%                                                                                   |
| <b>70°C</b> | <b>3</b>                   | <b>2,2'-bipy</b>                                                            | <b>60%</b>                                                                            |
| RT          | 3                          | 1,10-phen                                                                   | 13%                                                                                   |
| <b>70°C</b> | <b>3</b>                   | <b>1,10-phen</b>                                                            | <b>57%</b>                                                                            |
| RT          | 3                          | Sigman's ligand                                                             | 44%                                                                                   |
| 70°C        | 3                          | Sigman's ligand                                                             | 48%                                                                                   |
| RT          | 3                          | pybox                                                                       | 41%                                                                                   |
| <b>70°C</b> | <b>3</b>                   | <b>pybox</b>                                                                | <b>55%</b>                                                                            |
| RT          | 3                          | 4,4'-dimethyl-2,2'-bipy                                                     | 21%                                                                                   |
| <b>70°C</b> | <b>3</b>                   | <b>4,4'-dimethyl-2,2'-bipy</b>                                              | <b>52%</b>                                                                            |
| RT          | 3                          | 4,4'-dimethoxy-2,2'-bipy                                                    | 28%                                                                                   |
| <b>70°C</b> | <b>3</b>                   | <b>4,4'-dimethoxy-2,2'-bipy</b>                                             | <b>56%</b>                                                                            |
| RT          | 3                          | 4,4'-di- <i>tert</i> -butyl-2,2'-bipy                                       | 20%                                                                                   |
| <b>70°C</b> | <b>3</b>                   | <b>4,4'-di-<i>tert</i>-butyl-2,2'-bipy</b>                                  | <b>57%</b>                                                                            |
| RT          | 3                          | 5,5'-dimethyl-2,2'-bipy                                                     | 20%                                                                                   |
| <b>70°C</b> | <b>3</b>                   | <b>5,5'-dimethyl-2,2'-bipy</b>                                              | <b>58%</b>                                                                            |
| RT          | 3                          | 6,6'-dimethyl-2,2'-bipy                                                     | 52%                                                                                   |
| 70°C        | 3                          | 6,6'-dimethyl-2,2'-bipy                                                     | 46%                                                                                   |
| RT          | 3                          | BPhen                                                                       | 23%                                                                                   |
| <b>70°C</b> | <b>3</b>                   | <b>BPhen</b>                                                                | <b>55%</b>                                                                            |
| RT          | 3                          | neocuproine                                                                 | 44%                                                                                   |
| 70°C        | 3                          | neocuproine                                                                 | 47%                                                                                   |
| <b>RT</b>   | <b>3</b>                   | <b>bathocuproine</b>                                                        | <b>53%</b>                                                                            |
| 70°C        | 3                          | bathocuproine                                                               | 50%                                                                                   |
| RT          | 3                          | 2,2':6',2''-terpy                                                           | 33%                                                                                   |
| 70°C        | 3                          | 2,2':6',2''-terpy                                                           | 48%                                                                                   |
| RT          | 3                          | pymox                                                                       | 41%                                                                                   |

|      |   |                                                    |     |
|------|---|----------------------------------------------------|-----|
| 70°C | 3 | pymox                                              | 56% |
| RT   | 3 | 4,4',4''-tri- <i>tert</i> -butyl-2,2':6',2''-terpy | 11% |
| 70°C | 3 | 4,4',4''-tri- <i>tert</i> -butyl-2,2':6',2''-terpy | 50% |
| RT   | 3 | 2-ampy                                             | 22% |
| 70°C | 3 | 2-ampy                                             | 50% |
| RT   | 3 | di-(2-picoly)amine                                 | 15% |
| 70°C | 3 | di-(2-picoly)amine                                 | 46% |
| RT   | 3 | 4,4'-bis(CF <sub>3</sub> )-2,2'-bipy               | 35% |
| 70°C | 3 | 4,4'-bis(CF <sub>3</sub> )-2,2'-bipy               | 56% |
| RT   | 3 | 2,2'-bpz                                           | 50% |
| 70°C | 3 | 2,2'-bpz                                           | 50% |
| RT   | 3 | 2,2'-bpm                                           | 23% |
| 70°C | 3 | 2,2'-bpm                                           | 50% |

Ethyl-salen is *N,N'*-bis(salicylidene)ethylenediamine. Propyl-salen is *N,N'*-bis(salicylidene)-1,3-propanediamine. Salphen is *N,N'*-bis(salicylidene)-*o*-phenylenediamine which is also known as *N,N'*-bis(salicylidene)-*ortho*-phenylenediamine or *N,N'*-bis(salicylidene)-1,2-phenylenediamine. (S,S)-Jacobsen's ligand is (S,S)-(+)-*N,N'*-bis(3,5-di-*tert*-butylsalicylidene)-1,2-cyclohexanediamine. 2,2'-bipy is 2,2'-bipyridine. 1,10-phen is 1,10-phenanthroline. Sigman's ligand is 2-(2-quinolyl)oxazoline which is also known as 2-(4,5-dihydro-2-oxazolyl)quinoline. Pybox is 2,6-bis(4,5-dihydrooxazol-2-yl)pyridine which is also known as 2,6-di(2-oxazolyl)pyridine. 4,4'-dimethyl-2,2'-bipy is 4,4'-dimethyl-2,2'-bipyridine. 4,4'-dimethoxy-2,2'-bipy is 4,4'-dimethoxy-2,2'-bipyridine. 4,4'-di-*tert*-butyl-2,2'-bipy is 4,4'-di-*tert*-butyl-2,2'-bipyridine. 5,5'-dimethyl-2,2'-bipy is 5,5'-dimethyl-2,2'-bipyridine. 6,6'-dimethyl-2,2'-bipy is 6,6'-dimethyl-2,2'-bipyridine. BPhen is bathophenanthroline which is also known as 4,7-diphenyl-1,10-phenanthroline. Neocuproine is 2,9-dimethyl-1,10-phenanthroline. Bathocuproine is 2,9-dimethyl-4,7-diphenyl-1,10-phenanthroline. 2,2':6',2''-terpy is 2,2':6',2''-terpyridine which is also known as either 2,6-bis(2-pyridyl)pyridine or 1<sup>2</sup>,2<sup>2</sup>:2<sup>6</sup>,3<sup>2</sup>-terpyridine. Pymox is 2-pyrid-2-ylmonooxazoline which is also known as 2-(pyridin-2-yl)-4,5-dihydrooxazole or 2-(2-pyridyl)-4,5-dihydrooxazole or 2-pyrid-2-yloxazoline. 4,4',4''-tri-*tert*-butyl-2,2':6',2''-terpy is 4,4',4''-tri-*tert*-butyl-2,2':6',2''-terpyridine which is also known as 1<sup>4</sup>,2<sup>4</sup>,3<sup>4</sup>-tri-*tert*-butyl-1<sup>2</sup>,2<sup>2</sup>:2<sup>6</sup>,3<sup>2</sup>-terpyridine. 2-ampy is 2-aminomethylpyridine which is also known as (pyridin-2-yl)methanamine or 2-picolyamine. Di-(2-picoly)amine is also known as 2-(2-pyridylmethyl)aminomethylpyridine or bis(2-pyridylmethyl)amine or bis(pyridin-2-ylmethyl)amine. 4,4'-bis(CF<sub>3</sub>)-2,2'-bipy is 4,4'-bis(trifluoromethyl)-2,2'-bipyridine. 2,2'-bpz is 2,2'-bipyrazine. 2,2'-bpm is 2,2'-bipyrimidine.

#### General procedure:

The ligand (20 mol%, 0.0000892 mol = 0.0892 mmol) was placed into a vial with a stir bar followed by 4 mL MeCN. Next, Mn(OAc)<sub>2</sub> 4H<sub>2</sub>O (20 mol%, 0.0000892 mol = 0.0892 mmol) was added to the vial and the vial was sealed and allowed to stir vigorously for 5 min at RT. Then, the 1-chloroadamantane (1 eq., 0.000446 mol = 0.446 mmol, 0.076 g) was added to the vial and then the TMS-N<sub>3</sub> (3.07 eq., 0.00137 mol = 1.37 mmol, 0.18 mL) was added to the vial. Lastly, the Selectfluor (3 eq., 0.001338 mol = 1.338 mmol, 0.474 g) was added to the vial. The vial was sealed tightly and placed on/into the correct conditions regarding the temperature. The reaction was stirred vigorously for 24 hours. Then, the reaction was diluted with DCM and ran over a short silica pad, which was washed multiple times with DCM, and then concentrated on the rotary evaporator. The NMR yields were determined by using 1,3,5-trimethoxybenzene as an internal standard.

(1*r*,3*s*,5*R*,7*S*)-1-azido-3-chloroadamantane has previously been characterized.<sup>[2]</sup> <sup>1</sup>H-NMR (600 MHz, CDCl<sub>3</sub>) δ 2.27 (s, 2H), 2.09 (s, 2H), 1.99 (q, *J* = 12.3 Hz, 4H), 1.70 (s, 3H), 1.53 (q, *J* = 12.0 Hz, 2H) 1.18 (s, br, 1H). <sup>13</sup>C{<sup>1</sup>H}-NMR (151 MHz, CDCl<sub>3</sub>) δ 66.5, 60.4, 51.1, 46.0, 39.8, 34.0, 31.8.

Screening Ligands (20 mol%) with Mn(OAc)<sub>3</sub> 2H<sub>2</sub>O (20 mol%) for the Azidation of 1-Chloroadamantane

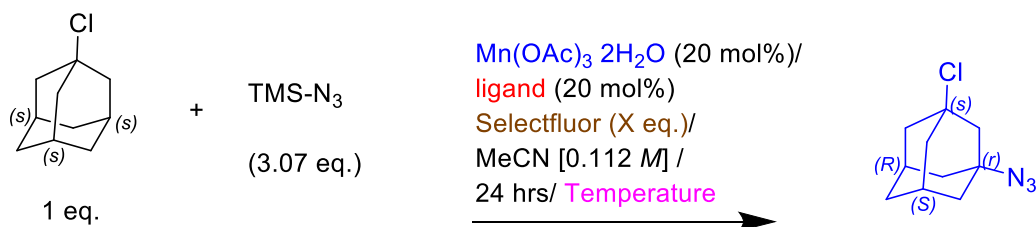

| Temperature | Equivalents of Selectfluor | Ligand (20 mol%) used with Mn(OAc) <sub>3</sub> 2H <sub>2</sub> O (20 mol%) | Yield of (1 <i>r</i> ,3 <i>s</i> ,5 <i>R</i> ,7 <i>S</i> )-1-azido-3-chloroadamantane |
|-------------|----------------------------|-----------------------------------------------------------------------------|---------------------------------------------------------------------------------------|
| RT          | 3                          | ethyl-salen                                                                 | 6%                                                                                    |
| 70°C        | 3                          | ethyl-salen                                                                 | 17%                                                                                   |
| RT          | 3                          | propyl-salen                                                                | 8%                                                                                    |
| 70°C        | 3                          | propyl-salen                                                                | 15%                                                                                   |
| RT          | 3                          | salphen                                                                     | 7%                                                                                    |
| 70°C        | 3                          | salphen                                                                     | 14%                                                                                   |
| RT          | 3                          | ( <i>S,S</i> )-Jacobsen's ligand                                            | 36%                                                                                   |
| 70°C        | 3                          | ( <i>S,S</i> )-Jacobsen's ligand                                            | 23%                                                                                   |
| RT          | 3                          | 2,2'-bipy                                                                   | 28%                                                                                   |
| 70°C        | 3                          | <b>2,2'-bipy</b>                                                            | <b>59%</b>                                                                            |
| RT          | 3                          | 1,10-phen                                                                   | 22%                                                                                   |
| 70°C        | 3                          | <b>1,10-phen</b>                                                            | <b>57%</b>                                                                            |
| RT          | 3                          | Sigman's ligand                                                             | 37%                                                                                   |
| 70°C        | 3                          | <b>Sigman's ligand</b>                                                      | <b>54%</b>                                                                            |
| RT          | 3                          | pybox                                                                       | 49%                                                                                   |
| 70°C        | 3                          | pybox                                                                       | 50%                                                                                   |
| RT          | 3                          | 4,4'-dimethyl-2,2'-bipy                                                     | 22%                                                                                   |
| 70°C        | 3                          | <b>4,4'-dimethyl-2,2'-bipy</b>                                              | <b>64%</b>                                                                            |
| RT          | 3                          | 4,4'-dimethoxy-2,2'-bipy                                                    | 30%                                                                                   |
| 70°C        | 3                          | <b>4,4'-dimethoxy-2,2'-bipy</b>                                             | <b>53%</b>                                                                            |
| RT          | 3                          | 4,4'-di- <i>tert</i> -butyl-2,2'-bipy                                       | 23%                                                                                   |
| 70°C        | 3                          | <b>4,4'-di-<i>tert</i>-butyl-2,2'-bipy</b>                                  | <b>55%</b>                                                                            |
| RT          | 3                          | 5,5'-dimethyl-2,2'-bipy                                                     | 13%                                                                                   |
| 70°C        | 3                          | <b>5,5'-dimethyl-2,2'-bipy</b>                                              | <b>58%</b>                                                                            |
| RT          | 3                          | <b>6,6'-dimethyl-2,2'-bipy</b>                                              | <b>52%</b>                                                                            |
| 70°C        | 3                          | <b>6,6'-dimethyl-2,2'-bipy</b>                                              | <b>52%</b>                                                                            |
| RT          | 3                          | BPhen                                                                       | 29%                                                                                   |
| 70°C        | 3                          | <b>BPhen</b>                                                                | <b>58%</b>                                                                            |
| RT          | 3                          | neocuproine                                                                 | 47%                                                                                   |
| 70°C        | 3                          | <b>neocuproine</b>                                                          | <b>56%</b>                                                                            |
| RT          | 3                          | <b>bathocuproine</b>                                                        | <b>56%</b>                                                                            |
| 70°C        | 3                          | bathocuproine                                                               | 50%                                                                                   |
| RT          | 3                          | 2,2':6',2''-terpy                                                           | 35%                                                                                   |
| 70°C        | 3                          | 2,2':6',2''-terpy                                                           | 50%                                                                                   |
| RT          | 3                          | pymox                                                                       | 45%                                                                                   |

|      |   |                                                    |     |
|------|---|----------------------------------------------------|-----|
| 70°C | 3 | pymox                                              | 56% |
| RT   | 3 | 4,4',4''-tri- <i>tert</i> -butyl-2,2':6',2''-terpy | 21% |
| 70°C | 3 | 4,4',4''-tri- <i>tert</i> -butyl-2,2':6',2''-terpy | 50% |
| RT   | 3 | 2-ampy                                             | 30% |
| 70°C | 3 | 2-ampy                                             | 55% |
| RT   | 3 | di-(2-picoly)amine                                 | 25% |
| 70°C | 3 | di-(2-picoly)amine                                 | 41% |
| RT   | 3 | 4,4'-bis(CF <sub>3</sub> )-2,2'-bipy               | 37% |
| 70°C | 3 | 4,4'-bis(CF <sub>3</sub> )-2,2'-bipy               | 56% |
| RT   | 3 | 2,2'-bpz                                           | 50% |
| 70°C | 3 | 2,2'-bpz                                           | 50% |
| RT   | 3 | 2,2'-bpm                                           | 33% |
| 70°C | 3 | 2,2'-bpm                                           | 50% |

Ethyl-salen is *N,N'*-bis(salicylidene)ethylenediamine. Propyl-salen is *N,N'*-bis(salicylidene)-1,3-propanediamine. Salphen is *N,N'*-bis(salicylidene)-*o*-phenylenediamine which is also known as *N,N'*-bis(salicylidene)-*ortho*-phenylenediamine or *N,N'*-bis(salicylidene)-1,2-phenylenediamine. (S,S)-Jacobsen's ligand is (S,S)-(+)-*N,N'*-bis(3,5-di-*tert*-butylsalicylidene)-1,2-cyclohexanediamine. 2,2'-bipy is 2,2'-bipyridine. 1,10-phen is 1,10-phenanthroline. Sigman's ligand is 2-(2-quinolinyl)oxazoline which is also known as 2-(4,5-dihydro-2-oxazolyl)quinoline. Pybox is 2,6-bis(4,5-dihydrooxazol-2-yl)pyridine which is also known as 2,6-di(2-oxazolyl)pyridine. 4,4'-dimethyl-2,2'-bipy is 4,4'-dimethyl-2,2'-bipyridine. 4,4'-dimethoxy-2,2'-bipy is 4,4'-dimethoxy-2,2'-bipyridine. 4,4'-di-*tert*-butyl-2,2'-bipy is 4,4'-di-*tert*-butyl-2,2'-bipyridine. 5,5'-dimethyl-2,2'-bipy is 5,5'-dimethyl-2,2'-bipyridine. 6,6'-dimethyl-2,2'-bipy is 6,6'-dimethyl-2,2'-bipyridine. BPhen is bathophenanthroline which is also known as 4,7-diphenyl-1,10-phenanthroline. Neocuproine is 2,9-dimethyl-1,10-phenanthroline. Bathocuproine is 2,9-dimethyl-4,7-diphenyl-1,10-phenanthroline. 2,2':6',2''-terpy is 2,2':6',2''-terpyridine which is also known as either 2,6-bis(2-pyridyl)pyridine or 1<sup>2</sup>,2<sup>2</sup>:2<sup>6</sup>,3<sup>2</sup>-terpyridine. Pymox is 2-pyrid-2-ylmonooxazoline which is also known as 2-(pyridin-2-yl)-4,5-dihydrooxazole or 2-(2-pyridyl)-4,5-dihydrooxazole or 2-pyrid-2-yloxazoline. 4,4',4''-tri-*tert*-butyl-2,2':6',2''-terpy is 4,4',4''-tri-*tert*-butyl-2,2':6',2''-terpyridine which is also known as 1<sup>4</sup>,2<sup>4</sup>,3<sup>4</sup>-tri-*tert*-butyl-1<sup>2</sup>,2<sup>2</sup>:2<sup>6</sup>,3<sup>2</sup>-terpyridine. 2-ampy is 2-aminomethylpyridine which is also known as (pyridin-2-yl)methanamine or 2-picolyamine. Di-(2-picoly)amine is also known as 2-(2-pyridylmethyl)aminomethylpyridine or bis(2-pyridylmethyl)amine or bis(pyridin-2-ylmethyl)amine. 4,4'-bis(CF<sub>3</sub>)-2,2'-bipy is 4,4'-bis(trifluoromethyl)-2,2'-bipyridine. 2,2'-bpz is 2,2'-bipyrazine. 2,2'-bpm is 2,2'-bipyrimidine.

#### General procedure:

The ligand (20 mol%, 0.0000892 mol = 0.0892 mmol) was placed into a vial with a stir bar followed by 4 mL MeCN. Next, Mn(OAc)<sub>3</sub> · 2H<sub>2</sub>O (20 mol%, 0.0000892 mol = 0.0892 mmol) was added to the vial and the vial was sealed and allowed to stir vigorously for 5 min at RT. Then, the 1-chloroadamantane (1 eq., 0.000446 mol = 0.446 mmol, 0.076 g) was added to the vial and then the TMS-N<sub>3</sub> (3.07 eq., 0.00137 mol = 1.37 mmol, 0.18 mL) was added to the vial. Lastly, the Selectfluor (3 eq., 0.001338 mol = 1.338 mmol, 0.474 g) was added to the vial. The vial was sealed tightly and placed on/into the correct conditions regarding the temperature. The reaction was stirred vigorously for 24 hours. Then, the reaction was diluted with DCM and ran over a short silica pad, which was washed multiple times with DCM, and then concentrated on the rotary evaporator. The NMR yields were determined by using 1,3,5-trimethoxybenzene as an internal standard.

(1*r*,3*s*,5*R*,7*S*)-1-azido-3-chloroadamantane has previously been characterized.<sup>[2]</sup> <sup>1</sup>H-NMR (600 MHz, CDCl<sub>3</sub>) δ 2.27 (s, 2H), 2.09 (s, 2H), 1.99 (q, *J* = 12.3 Hz, 4H), 1.70 (s, 3H), 1.53 (q, *J* = 12.0 Hz, 2H) 1.18 (s, br, 1H). <sup>13</sup>C{<sup>1</sup>H}-NMR (151 MHz, CDCl<sub>3</sub>) δ 66.5, 60.4, 51.1, 46.0, 39.8, 34.0, 31.8.

# Screening Ligands with Mn(OAc)<sub>2</sub> 4H<sub>2</sub>O for the Azidation of 1-Chloroadamantane

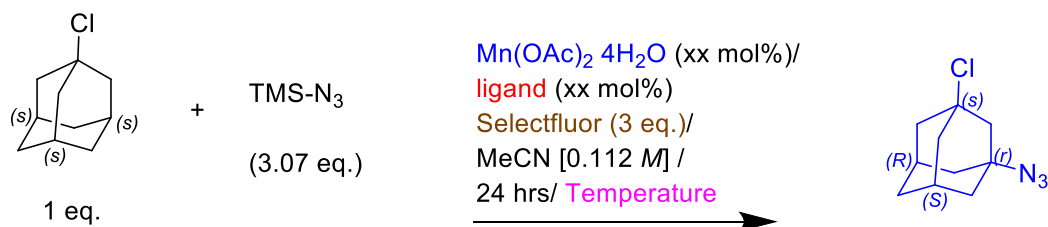

| Temperature          | Mn(OAc) <sub>2</sub> 4H <sub>2</sub> O | Ligand                                          | Yield of (1 <i>r</i> ,3 <i>s</i> ,5 <i>R</i> ,7 <i>S</i> )-1-azido-3-chloroadamantane |
|----------------------|----------------------------------------|-------------------------------------------------|---------------------------------------------------------------------------------------|
| RT                   | 5 mol%                                 | (none)                                          | 41%                                                                                   |
| 70°C                 | 5 mol%                                 | (none)                                          | 38%                                                                                   |
| RT                   | 10 mol%                                | (none)                                          | 50%                                                                                   |
| 70°C                 | 10 mol%                                | (none)                                          | 50%                                                                                   |
| RT                   | 30 mol%                                | (none)                                          | 55%                                                                                   |
| 70°C                 | 30 mol%                                | (none)                                          | 60%                                                                                   |
| 70°C                 | 5 mol%                                 | 2,2'-bipy (5 mol%)                              | 49%                                                                                   |
| RT, 390 nm Blue LEDS | 5 mol%                                 | 2,2'-bipy (5 mol%)                              | 11%                                                                                   |
| RT, 427 nm Blue LEDS | 5 mol%                                 | 2,2'-bipy (5 mol%)                              | 14%                                                                                   |
| 70°C                 | 5 mol%                                 | 2,2'-bipy (10 mol%)                             | 46%                                                                                   |
| <b>70°C</b>          | <b>10 mol%</b>                         | <b>2,2'-bipy (10 mol%)</b>                      | <b>57%</b>                                                                            |
| 70°C                 | 10 mol%                                | 2,2'-bipy (20 mol%)                             | 50%                                                                                   |
| 70°C                 | 20 mol%                                | 2,2'-bipy (30 mol%)                             | 58%                                                                                   |
| 70°C                 | 20 mol%                                | 2,2'-bipy (40 mol%)                             | 56%                                                                                   |
| 70°C                 | 30 mol%                                | 2,2'-bipy (30 mol%)                             | 60%                                                                                   |
| 70°C                 | 5 mol%                                 | 1,10-phen (5 mol%)                              | 44%                                                                                   |
| 70°C                 | 5 mol%                                 | 1,10-phen (10 mol%)                             | 41%                                                                                   |
| 70°C                 | 10 mol%                                | 1,10-phen (10 mol%)                             | 54%                                                                                   |
| 70°C                 | 10 mol%                                | 1,10-phen (20 mol%)                             | 56%                                                                                   |
| 70°C                 | 30 mol%                                | 1,10-phen (30 mol%)                             | 57%                                                                                   |
| 70°C                 | 5 mol%                                 | 4,4'-di- <i>tert</i> -butyl-2,2'-bipy (5 mol%)  | 48%                                                                                   |
| 70°C                 | 5 mol%                                 | 4,4'-di- <i>tert</i> -butyl-2,2'-bipy (10 mol%) | 52%                                                                                   |
| 70°C                 | 10 mol%                                | 4,4'-di- <i>tert</i> -butyl-2,2'-bipy (10 mol%) | 56%                                                                                   |
| 70°C                 | 10 mol%                                | 4,4'-di- <i>tert</i> -butyl-2,2'-bipy (20 mol%) | 54%                                                                                   |
| 70°C                 | 30 mol%                                | 4,4'-di- <i>tert</i> -butyl-2,2'-bipy (30 mol%) | 56%                                                                                   |
| 70°C                 | 5 mol%                                 | 5,5'-dimethyl-2,2'-bipy (5 mol%)                | 42%                                                                                   |
| 70°C                 | 5 mol%                                 | 5,5'-dimethyl-2,2'-bipy (10 mol%)               | 47%                                                                                   |
| 70°C                 | 10 mol%                                | 5,5'-dimethyl-2,2'-bipy (10 mol%)               | 51%                                                                                   |
| 70°C                 | 10 mol%                                | 5,5'-dimethyl-2,2'-bipy (20 mol%)               | 50%                                                                                   |
| 70°C                 | 30 mol%                                | 5,5'-dimethyl-2,2'-bipy (30 mol%)               | 55%                                                                                   |

#### General procedure:

The ligand was placed into a vial with a stir bar followed by 4 mL MeCN. Next,  $\text{Mn}(\text{OAc})_2 \cdot 4\text{H}_2\text{O}$  was added to the vial and the vial was sealed and allowed to stir vigorously for 5 min at RT. Then, the 1-chloroadamantane (1 eq., 0.000446 mol = 0.446 mmol, 0.076 g) was added to the vial and then the  $\text{TMS-N}_3$  (3.07 eq., 0.00137 mol = 1.37 mmol, 0.18 mL) was added to the vial. Lastly, the Selectfluor (3 eq., 0.001338 mol = 1.338 mmol, 0.474 g) was added to the vial. The vial was sealed tightly and placed on/into the correct conditions regarding the temperature. The reaction was stirred vigorously for 24 hours. Then, the reaction was diluted with DCM and ran over a short silica pad, which was washed multiple times with DCM, and then concentrated on the rotary evaporator. The NMR yields were determined by using 1,3,5-trimethoxybenzene as an internal standard.

(1*r*,3*s*,5*R*,7*S*)-1-azido-3-chloroadamantane has previously been characterized.<sup>[2]</sup>  $^1\text{H-NMR}$  (600 MHz,  $\text{CDCl}_3$ )  $\delta$  2.27 (s, 2H), 2.09 (s, 2H), 1.99 (q,  $J$  = 12.3 Hz, 4H), 1.70 (s, 3H), 1.53 (q,  $J$  = 12.0 Hz, 2H) 1.18 (s, br, 1H).  $^{13}\text{C}\{^1\text{H}\}\text{-NMR}$  (151 MHz,  $\text{CDCl}_3$ )  $\delta$  66.5, 60.4, 51.1, 46.0, 39.8, 34.0, 31.8.



# Screening Ligands with Mn(OAc)<sub>3</sub> 2H<sub>2</sub>O for the Azidation of 1-Chloroadamantane

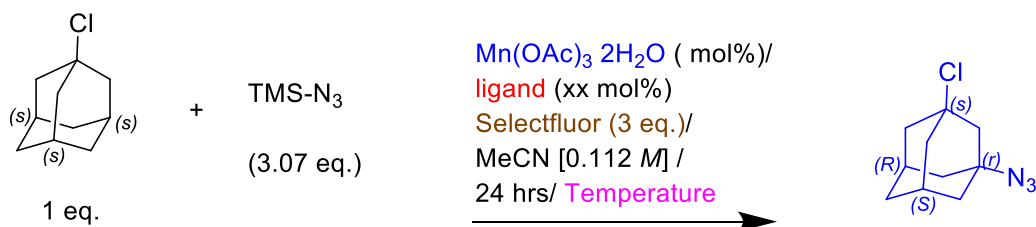

| Temperature          | Mn(OAc) <sub>3</sub> 2H <sub>2</sub> O | Ligand                                          | Yield of (1r,3s,5R,7S)-1-azido-3-chloroadamantane |
|----------------------|----------------------------------------|-------------------------------------------------|---------------------------------------------------|
| RT                   | 5 mol%                                 | (none)                                          | 34%                                               |
| 70°C                 | 5 mol%                                 | (none)                                          | 38%                                               |
| RT                   | 10 mol%                                | (none)                                          | 50%                                               |
| 70°C                 | 10 mol%                                | (none)                                          | 54%                                               |
| RT                   | 30 mol%                                | (none)                                          | 54%                                               |
| 70°C                 | 30 mol%                                | (none)                                          | 58%                                               |
| 70°C                 | 5 mol%                                 | 2,2'-bipy (5 mol%)                              | 45%                                               |
| RT, 390 nm Blue LEDS | 5 mol%                                 | 2,2'-bipy (5 mol%)                              | 15%                                               |
| RT, 427 nm Blue LEDS | 5 mol%                                 | 2,2'-bipy (5 mol%)                              | 17%                                               |
| 70°C                 | 5 mol%                                 | 2,2'-bipy (10 mol%)                             | 51%                                               |
| 70°C                 | 5 mol%                                 | 2,2'-bipy (15 mol%)                             | 50%                                               |
| <b>70°C</b>          | <b>10 mol%</b>                         | <b>2,2'-bipy (10 mol%)</b>                      | <b>58%</b>                                        |
| 70°C                 | 10 mol%                                | 2,2'-bipy (20 mol%)                             | 54%                                               |
| 70°C                 | 20 mol%                                | 2,2'-bipy (30 mol%)                             | 55%                                               |
| 70°C                 | 20 mol%                                | 2,2'-bipy (40 mol%)                             | 55%                                               |
| 70°C                 | 30 mol%                                | 2,2'-bipy (30 mol%)                             | 56%                                               |
| 70°C                 | 5 mol%                                 | 1,10-phen (5 mol%)                              | 49%                                               |
| 70°C                 | 5 mol%                                 | 1,10-phen (10 mol%)                             | 49%                                               |
| 70°C                 | 10 mol%                                | 1,10-phen (10 mol%)                             | 56%                                               |
| 70°C                 | 10 mol%                                | 1,10-phen (20 mol%)                             | 50%                                               |
| 70°C                 | 30 mol%                                | 1,10-phen (30 mol%)                             | 60%                                               |
| 70°C                 | 5 mol%                                 | 4,4'-dimethyl-2,2'-bipy (5 mol%)                | 52%                                               |
| 70°C                 | 5 mol%                                 | 4,4'-dimethyl-2,2'-bipy (10 mol%)               | 52%                                               |
| 70°C                 | 10 mol%                                | 4,4'-dimethyl-2,2'-bipy (10 mol%)               | 55%                                               |
| 70°C                 | 10 mol%                                | 4,4'-dimethyl-2,2'-bipy (20 mol%)               | 51%                                               |
| 70°C                 | none                                   | 4,4'-dimethyl-2,2'-bipy (20 mol%)               | 22%                                               |
| 70°C                 | 20 mol%                                | 4,4'-dimethyl-2,2'-bipy (30 mol%)               | 57%                                               |
| 70°C                 | 20 mol%                                | 4,4'-dimethyl-2,2'-bipy (40 mol%)               | 59%                                               |
| 70°C                 | 30 mol%                                | 4,4'-dimethyl-2,2'-bipy (30 mol%)               | 57%                                               |
| 70°C                 | 5 mol%                                 | 4,4'-di- <i>tert</i> -butyl-2,2'-bipy (5 mol%)  | 50%                                               |
| 70°C                 | 5 mol%                                 | 4,4'-di- <i>tert</i> -butyl-2,2'-bipy (10 mol%) | 53%                                               |
| 70°C                 | 10 mol%                                | 4,4'-di- <i>tert</i> -butyl-2,2'-bipy (10 mol%) | 55%                                               |
| 70°C                 | 10 mol%                                | 4,4'-di- <i>tert</i> -butyl-2,2'-bipy (20 mol%) | 50%                                               |
| 70°C                 | 30 mol%                                | 4,4'-di- <i>tert</i> -butyl-2,2'-bipy (30 mol%) | 56%                                               |
| 70°C                 | 5 mol%                                 | 5,5'-dimethyl-2,2'-bipy (5 mol%)                | 48%                                               |

|                      |               |                         |                 |            |
|----------------------|---------------|-------------------------|-----------------|------------|
| 70°C                 | 5 mol%        | 5,5'-dimethyl-2,2'-bipy | (10 mol%)       | 54%        |
| 70°C                 | 5 mol%        | 5,5'-dimethyl-2,2'-bipy | (15 mol%)       | 52%        |
| 70°C                 | 10 mol%       | 5,5'-dimethyl-2,2'-bipy | (10 mol%)       | 57%        |
| 70°C                 | 10 mol%       | 5,5'-dimethyl-2,2'-bipy | (20 mol%)       | 56%        |
| 70°C                 | 30 mol%       | 5,5'-dimethyl-2,2'-bipy | (30 mol%)       | 55%        |
| <b>70°C</b>          | <b>5 mol%</b> | <b>BPhen</b>            | <b>(5 mol%)</b> | <b>54%</b> |
| 70°C                 | none          | BPhen                   | (5 mol%)        | 18%        |
| RT                   | 5 mol%        | BPhen                   | (5 mol%)        | 32%        |
| RT, 390 nm Blue LEDS | 5 mol%        | BPhen                   | (5 mol%)        | 33%        |
| RT, 427 nm Blue LEDS | 5 mol%        | BPhen                   | (5 mol%)        | 30%        |
| 70°C                 | 5 mol%        | BPhen                   | (10 mol%)       | 54%        |
| 70°C                 | 10 mol%       | BPhen                   | (10 mol%)       | 50%        |
| 70°C                 | 10 mol%       | BPhen                   | (20 mol%)       | 47%        |
| 70°C                 | 30 mol%       | BPhen                   | (30 mol%)       | 58%        |

#### General procedure:

The ligand was placed into a vial with a stir bar followed by 4 mL MeCN. Next, Mn(OAc)<sub>3</sub> 2H<sub>2</sub>O was added to the vial and the vial was sealed and allowed to stir vigorously for 5 min at RT. Then, the 1-chloroadamantane (1 eq., 0.000446 mol = 0.446 mmol, 0.076 g) was added to the vial and then the TMS-N<sub>3</sub> (3.07 eq., 0.00137 mol = 1.37 mmol, 0.18 mL) was added to the vial. Lastly, the Selectfluor (3 eq., 0.001338 mol = 1.338 mmol, 0.474 g) was added to the vial. The vial was sealed tightly and placed on/into the correct conditions regarding the temperature. The reaction was stirred vigorously for 24 hours. Then, the reaction was diluted with DCM and ran over a short silica pad, which was washed multiple times with DCM, and then concentrated on the rotary evaporator. The NMR yields were determined by using 1,3,5-trimethoxybenzene as an internal standard.

(1*r*,3*s*,5*R*,7*S*)-1-azido-3-chloroadamantane has previously been characterized.<sup>[2]</sup> <sup>1</sup>H-NMR (600 MHz, CDCl<sub>3</sub>) δ 2.27 (s, 2H), 2.09 (s, 2H), 1.99 (q, *J* = 12.3 Hz, 4H), 1.70 (s, 3H), 1.53 (q, *J* = 12.0 Hz, 2H) 1.18 (s, br, 1H). <sup>13</sup>C{<sup>1</sup>H}-NMR (151 MHz, CDCl<sub>3</sub>) δ 66.5, 60.4, 51.1, 46.0, 39.8, 34.0, 31.8.

## Screening NaN<sub>3</sub> instead of TMS-N<sub>3</sub> for the Azidation of Cyclooctane

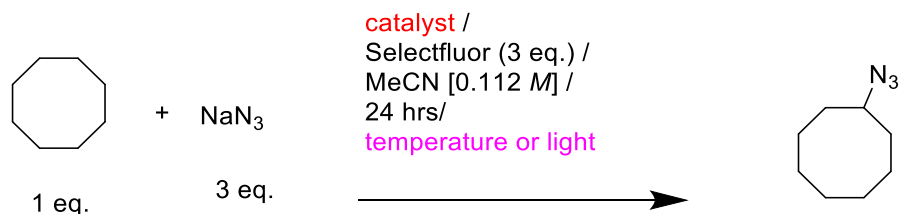

| Temp. or light                    | Catalyst                                                                         | Yield of azidocyclooctane                                                         |
|-----------------------------------|----------------------------------------------------------------------------------|-----------------------------------------------------------------------------------|
| 70°C                              | Fe(NO <sub>3</sub> ) <sub>3</sub> 9H <sub>2</sub> O (20 mol%)                    | 21%<br>(and 5% yield of fluorocyclooctane)                                        |
| 70°C                              | Fe(OTf) <sub>3</sub> (20 mol%)                                                   | 8%<br>(and 9% yield of fluorocyclooctane)<br>(and 4% yield of cyclooctanone)      |
| RT, 390 nm*<br>40 W,<br>Blue LEDs | Fe(NO <sub>3</sub> ) <sub>3</sub> 9H <sub>2</sub> O* (20 mol%)                   | 22%*<br>(and 13% yield of fluorocyclooctane)*<br>(and 4% yield of cyclooctanone)* |
| 70°C                              | Mn(OAc) <sub>3</sub> 2H <sub>2</sub> O (5 mol%) and BPhen (5 mol%)               | 8%<br>(and 4% yield of fluorocyclooctane)<br>(and 1% yield of cyclooctanone)      |
| 70°C                              | Mn(OAc) <sub>3</sub> 2H <sub>2</sub> O (20 mol%) and 1,4-dimethyl-bipy (20 mol%) | 12%<br>(and 4% yield of fluorocyclooctane)<br>(and 2% yield of cyclooctanone)     |

\*2 eq. Selectfluor and the concentration is 0.223 M (with 2 mL MeCN) instead of 0.112 M; 390 nm (40 W blue LEDs, 1 cm, 25% intensity)

Azidocyclooctane (also known as cyclooctyl azide) has previously been characterized.<sup>[1,2]</sup> <sup>1</sup>H-NMR (600 MHz, CDCl<sub>3</sub>) δ 3.55 (tt, *J* = 8.5, 4.0 Hz, 1H), 1.89 – 1.84 (m, 2H), 1.74 – 1.66 (m, 4H), 1.57 – 1.46 (m, 8H).

Fluorocyclooctane has previously been characterized.<sup>[3]</sup> <sup>1</sup>H-NMR (600 MHz, CDCl<sub>3</sub>) δ 4.69 (dm, *J* = 48 Hz, 1H), 1.93 – 1.86 (m, 4H), 1.74 – 1.69 (m, 2H), 1.59 – 1.44 (m, 8H).

Cyclooctanone has previously been characterized.<sup>[6]</sup> <sup>1</sup>H-NMR (600 MHz, CDCl<sub>3</sub>) δ 2.43 – 2.40 (m, 1H), 1.90 – 1.86 (m, 1H), 1.57 – 1.53 (m, 1H), 1.40 – 1.35 (m, 1H).

## Screening Conditions for the Azidation of Cycloheptanone with Selectfluor

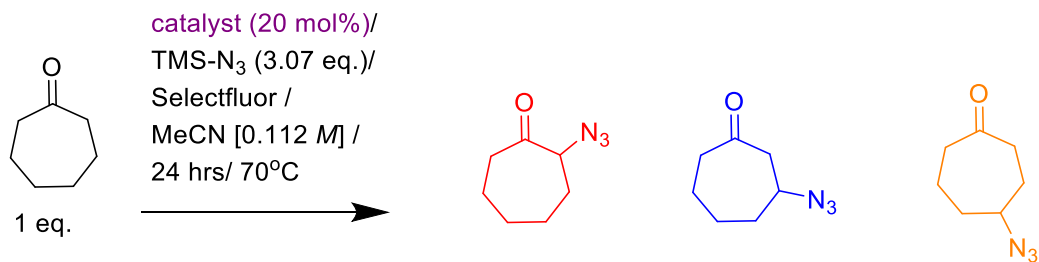

| Catalyst<br>(20 mol%)                                                                                                   | Selectfluor | 2-azidocycloheptanone | 3-azidocycloheptanone | 4-azidocycloheptanone |
|-------------------------------------------------------------------------------------------------------------------------|-------------|-----------------------|-----------------------|-----------------------|
| $\text{Fe}(\text{NO}_3)_3 \cdot 9\text{H}_2\text{O}$                                                                    | 2 eq.       | 17%                   | trace                 | trace                 |
| $\text{Fe}(\text{NO}_3)_3 \cdot 9\text{H}_2\text{O}$                                                                    | 3 eq.       | <b>53%</b>            | <b>16%</b>            | 16%                   |
| $\text{Fe}(\text{NO}_3)_3 \cdot 9\text{H}_2\text{O}$<br>with 1 eq. $\text{Na}_2\text{CO}_3$                             | 3 eq.       | 16%                   | 8%                    | 10%                   |
| $\text{Fe}(\text{OTf})_3$                                                                                               | 3 eq.       | 2%                    | 4%                    | <b>20%</b>            |
| (none)                                                                                                                  | 3 eq.       | 27%                   | 2%                    | 2%                    |
| (none)<br>with 1 eq. $\text{Na}_2\text{CO}_3$                                                                           | 3 eq.       | 10%                   | 1%                    | 1%                    |
| $\text{Fe}(\text{OAc})_2$                                                                                               | 3 eq.       | 29%                   | trace                 | trace                 |
| $\text{Fe}(\text{OTf})_2$                                                                                               | 3 eq.       | 7%                    | trace                 | trace                 |
| $\text{Fe}(\text{III})$ oxalate $6\text{H}_2\text{O}$                                                                   | 3 eq.       | 27%                   | trace                 | trace                 |
| $\text{Mn}(\text{OAc})_2 \cdot 4\text{H}_2\text{O}$                                                                     | 3 eq.       | 5%                    | trace                 | trace                 |
| $\text{MnF}_3$                                                                                                          | 3 eq.       | 18%                   | 4%                    | 4%                    |
| $\text{Mn}(\text{OAc})_3 \cdot 2\text{H}_2\text{O}$                                                                     | 3 eq.       | 16%                   | 3%                    | 3%                    |
| $\text{Mn}(\text{OTf})_2$                                                                                               | 3 eq.       | 18%                   | 5%                    | 7%                    |
| $\text{Mn}(\text{OAc})_3 \cdot 2\text{H}_2\text{O}$<br>(5 mol%),<br>BPhen (5 mol%)                                      | 3 eq.       | 21%                   | 4%                    | 4%                    |
| $\text{Mn}(\text{OAc})_3 \cdot 2\text{H}_2\text{O}$<br>(20 mol%),<br>4,4'-dimethyl-<br>bipy (20 mol%)                   | 3 eq.       | 24%                   | 4%                    | 4%                    |
| $\text{Fe}(\text{NO}_3)_3 \cdot 9\text{H}_2\text{O}$<br>with 1 eq. $\text{NaN}_3$ (as<br>well as the $\text{TMS-N}_3$ ) | 3 eq.       | 14%                   | 3%                    | 3%                    |
| $\text{Fe}(\text{NO}_3)_3 \cdot 9\text{H}_2\text{O}$ (1 eq.)                                                            | 0 eq.       | 14%                   | none                  | none                  |

#### General procedure:

Cycloheptanone (1 eq., 0.000446 mol = 0.446 mmol, 0.053 mL) was added to a vial with a stir bar followed by 4 mL MeCN (for 0.112 M). Next the catalyst (20 mol%, 0.0000892 mol = 0.0892 mmol) was added to the vial. Then, the TMS-N<sub>3</sub> (3.07 eq., 0.00137 mol = 1.37 mmol, 0.18 mL) was added to the vial and lastly the Selectfluor (3 eq., 0.001338 mol = 1.338 mmol, 474 mg) was added to the vial. The vial was sealed tightly and placed on to a pre-heated 70°C sand bath. The reaction was stirred vigorously for 24 hours. Then, the reaction was diluted with DCM and ran over a short silica pad, which was washed multiple times (with a mixture of ethyl acetate and hexanes in a 1:1 ratio), and then concentrated on the rotary evaporator. The NMR yields were determined by using 1,3,5-trimethoxybenzene as an internal standard.

2-azidocycloheptan-1-one (also known as 2-azidocycloheptanone or  $\alpha$ -azidocycloheptanone) has previously been characterized.<sup>[9]</sup>

<sup>1</sup>H-NMR (600 MHz, CDCl<sub>3</sub>)  $\delta$  4.08 (dd,  $J$  = 9.2, 3.7 Hz, 1H), 2.64 – 2.59 (m, 1H), 2.53 (ddd,  $J$  = 15.9, 10.1, 4.0 Hz, 1H), 1.86 – 1.60 (m, 6H), 1.48 – 1.43 (m, 1H).

<sup>13</sup>C{<sup>1</sup>H}-NMR (151 MHz, CDCl<sub>3</sub>)  $\delta$  208.6, 67.8, 41.4, 30.8, 28.9, 26.6, 23.6.

3-azidocycloheptan-1-one (also known as 3-azidocycloheptanone or  $\beta$ -azidocycloheptanone) has previously been characterized.<sup>[10]</sup>

4-azidocycloheptan-1-one (also known as 4-azidocycloheptanone or  $\gamma$ -azidocycloheptanone) has previously been characterized.<sup>[1]</sup>

#### **General procedure for Method A ([Fe] Conditions)**

The substrate (1 eq., 0.000446 mol = 0.446 mmol) was added to a vial with a stir bar followed by 4 mL MeCN (for 0.112 M). Next the  $\text{Fe}(\text{NO}_3)_3 \cdot 9\text{H}_2\text{O}$  (20 mol%, 0.0000892 mol = 0.0892 mmol, 36 mg) was added to the vial. Then, the  $\text{TMS-N}_3$  (3.07 eq., 0.00137 mol = 1.37 mmol, 0.18 mL) was added to the vial and lastly the Selectfluor (3 eq., 0.001338 mol = 1.338 mmol, 474 mg) was added to the vial. The vial was sealed tightly and placed on to a pre-heated 70°C sand bath. The reaction was stirred vigorously for 24 hours. Then, the reaction was diluted with DCM and ran over a short silica pad, which was washed multiple times and then concentrated on the rotary evaporator. The NMR yields were determined by using 1,3,5-trimethoxybenzene as an internal standard.

#### **General procedure for Method B (alternative [Mn] Conditions not presented in main text)**

BPhen (5 mol%, 0.0000223 mol = 0.0223 mmol, 7.4 mg) was placed into a vial with a stir bar followed by 4 mL MeCN. Next,  $\text{Mn}(\text{OAc})_3 \cdot 2\text{H}_2\text{O}$  (5 mol%, 0.0000223 mol = 0.0223 mmol, 5.98 mg) was added to the vial and the vial was sealed and allowed to stir vigorously for 5 min at RT. Next, the substrate (1 eq., 0.000446 mol = 0.446 mmol) was added to a vial. Then, the  $\text{TMS-N}_3$  (3.07 eq., 0.00137 mol = 1.37 mmol, 0.18 mL) was added to the vial and lastly the Selectfluor (3 eq., 0.001338 mol = 1.338 mmol, 474 mg) was added to the vial. The vial was sealed tightly and placed on to a pre-heated 70°C sand bath. The reaction was stirred vigorously for 24 hours. Then, the reaction was diluted with DCM and ran over a short silica pad, which was washed multiple times and then concentrated on the rotary evaporator. The NMR yields were determined by using 1,3,5-trimethoxybenzene as an internal standard.

#### **General procedure for Method C ([Mn] conditions)**

4,4'-dimethyl-2,2'-bipy (20 mol%, 0.0000892 mol = 0.0892 mmol, 16 mg) was placed into a vial with a stir bar followed by 4 mL MeCN. Next,  $\text{Mn}(\text{OAc})_3 \cdot 2\text{H}_2\text{O}$  (20 mol%, 0.0000892 mol = 0.0892 mmol, 23.9 mg) was added to the vial and the vial was sealed and allowed to stir vigorously for 5 min at RT. Next, the substrate (1 eq., 0.000446 mol = 0.446 mmol) was added to a vial. Then, the  $\text{TMS-N}_3$  (3.07 eq., 0.00137 mol = 1.37 mmol, 0.18 mL) was added to the vial and lastly the Selectfluor (3 eq., 0.001338 mol = 1.338 mmol, 474 mg) was added to the vial. The vial was sealed tightly and placed on to a pre-heated 70°C sand bath. The reaction was stirred vigorously for 24 hours. Then, the reaction was diluted with DCM and ran over a short silica pad, which was washed multiple times and then concentrated on the rotary evaporator. The NMR yields were determined by using 1,3,5-trimethoxybenzene as an internal standard.

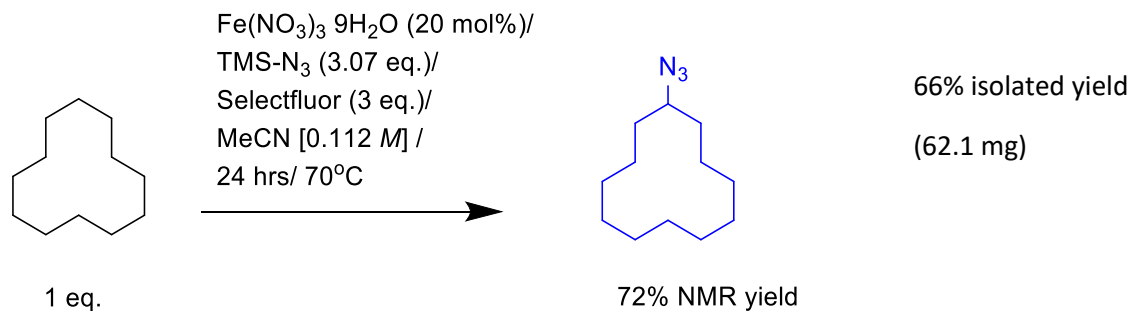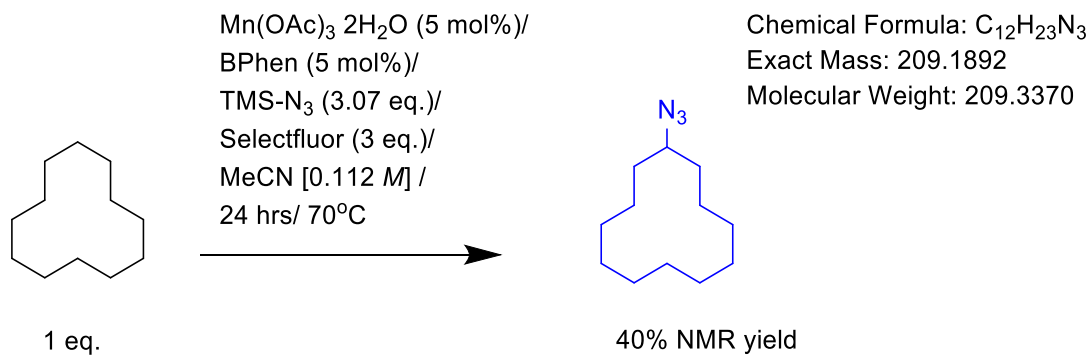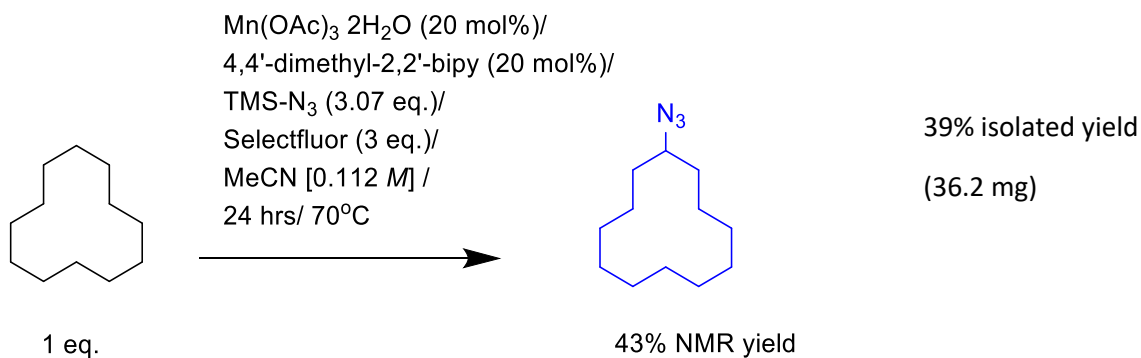

Azidocyclododecane (also known as cyclododecyl azide) has previously been characterized.<sup>[2,7]</sup>  $^1\text{H-NMR}$  (600 MHz,  $\text{CDCl}_3$ )  $\delta$  3.53 – 3.43 (m, 1H), 1.73 – 1.60 (m, 2H), 1.53 – 1.44 (m, 4H), 1.42 – 1.32 (m, 16H).

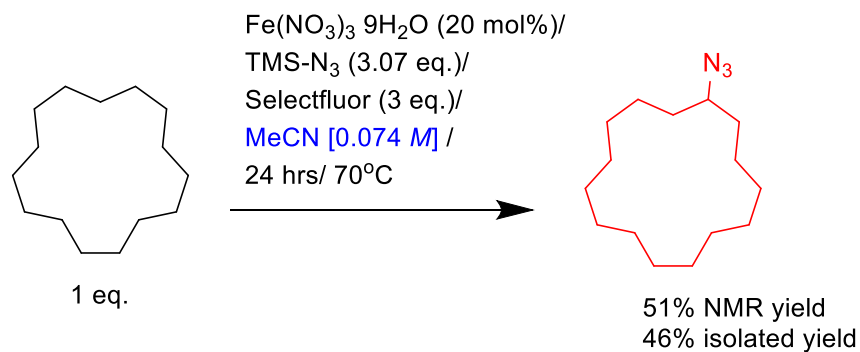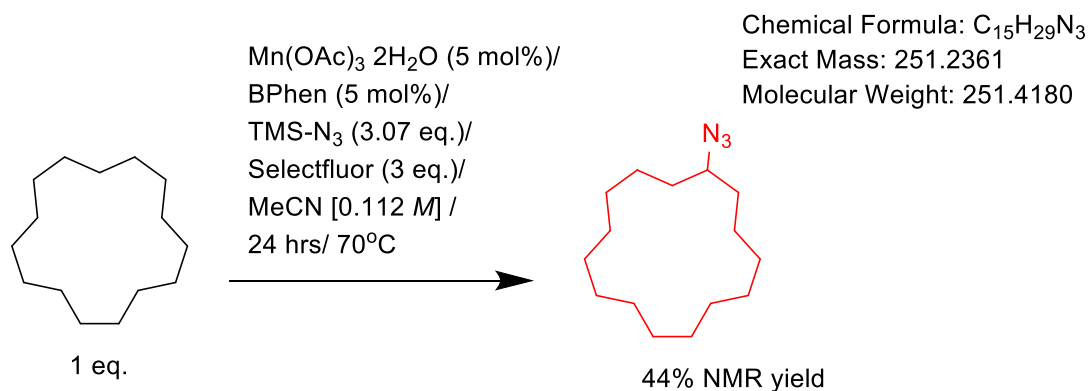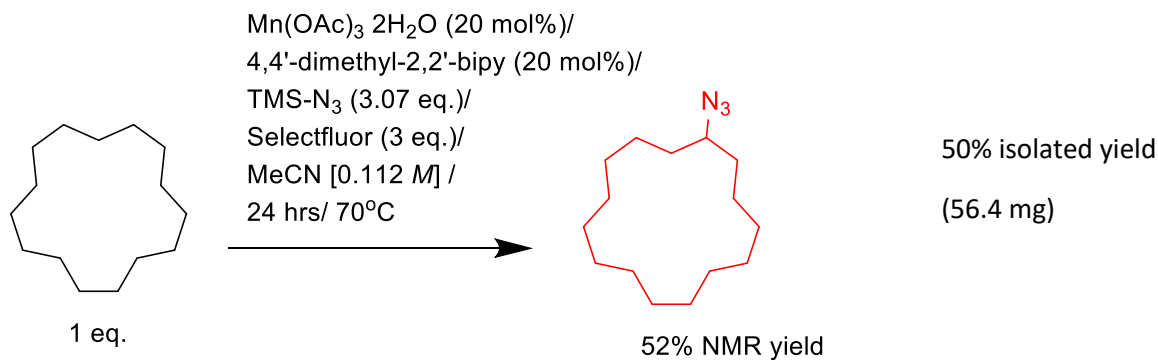

After purification with flash column chromatography on silica gel, the reaction produced a 46% isolated yield (51mg) of azidocyclopentadecane (also known as cyclopentadecyl azide) as a clear solid using conditions A and 50% isolated yield (56.4mg) using conditions C.

$^1H$ -NMR (600 MHz,  $CDCl_3$ )  $\delta$  3.35-3.29 (p,  $J$  = 6.15 Hz, 1H), 1.55-1.46 (m, 5H), 1.35-1.31 (s, br, 7H), 1.30-1.22 (s, br, 16H).  $^{13}C\{^1H\}$ -NMR (151 MHz,  $CDCl_3$ )  $\delta$  61.0, 31.7, 26.84, 26.77, 26.73, 26.68, 26.63, 23.6. HRAPCIMS  $m/z$  224.2368  $[M-N_2+H]^+$  (calcd for  $C_{15}H_{29}N_1+H^+$ , 224.2378).



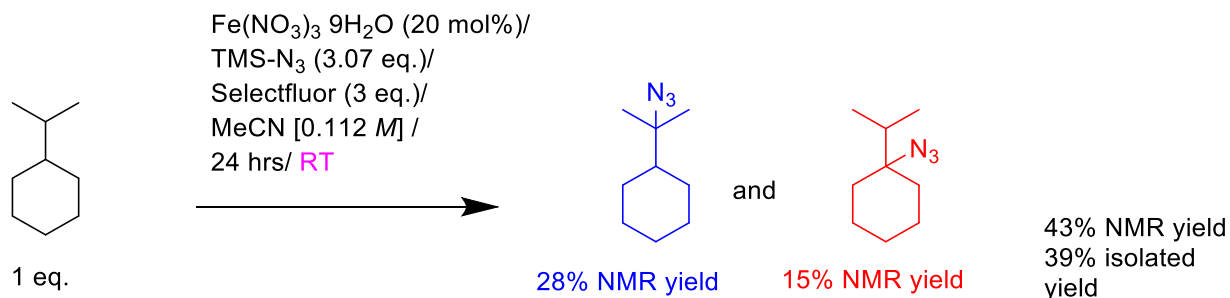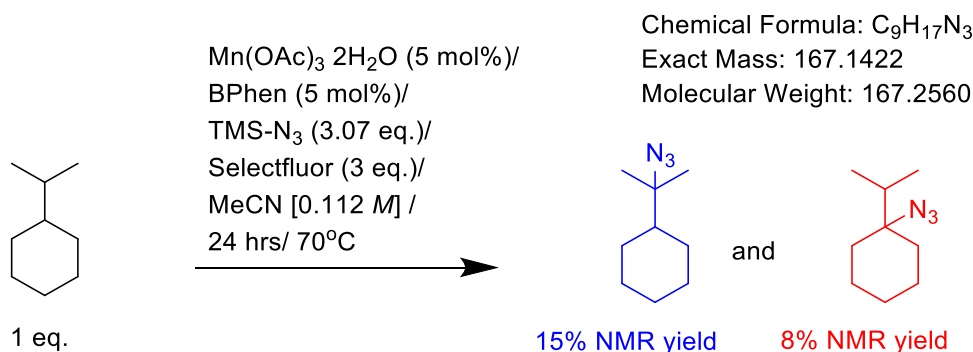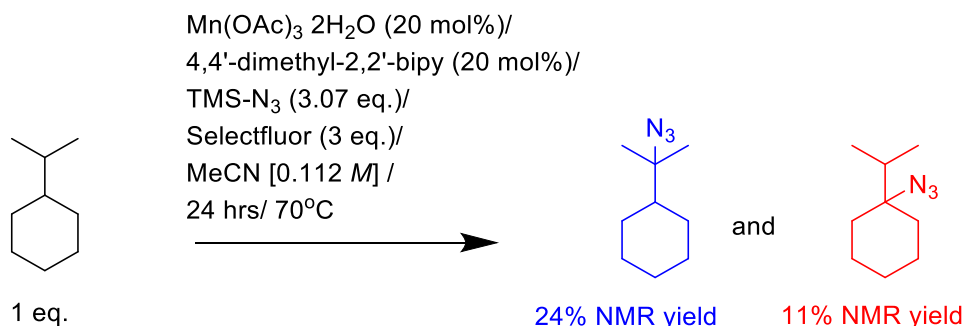

After purification with flash column chromatography on silica gel, the reaction produced a 39% isolated yield (29mg) of (2-azidopropan-2-yl)cyclohexane and 1-azido-1-isopropylcyclohexane as a clear liquid. Both (2-azidopropan-2-yl)cyclohexane and 1-azido-1-isopropylcyclohexane have previously been characterized together as a mixture of the two isomers.<sup>[2]</sup>

$^1\text{H}$ -NMR (600 MHz,  $\text{CDCl}_3$ )  $\delta$  1.82 – 1.76 (m, 3H), 1.70 – 1.64 (m, 2H), 1.61 – 1.53 (m, 1H), 1.42 – 1.27 (m, 2H), 1.22 (s, 4H), 1.15 – 1.09 (m, 1H), 1.04 – 0.91 (m, 2H), 0.96 (d,  $J$  = 6.8 Hz, 2H).

$^{13}\text{C}\{^1\text{H}\}$ -NMR (151 MHz,  $\text{CDCl}_3$ )  $\delta$  67.1, 64.7, 47.5, 37.2 (broad), 31.5, 27.7, 26.6, 26.4, 25.5, 23.5, 22.2, 17.2.

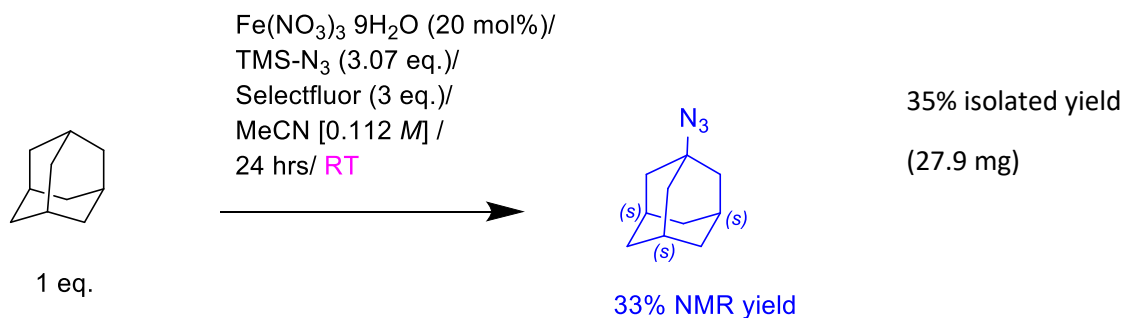

33% NMR yield

Chemical Formula:  $\text{C}_{10}\text{H}_{15}\text{N}_3$   
 Exact Mass: 177.1266  
 Molecular Weight: 177.2510

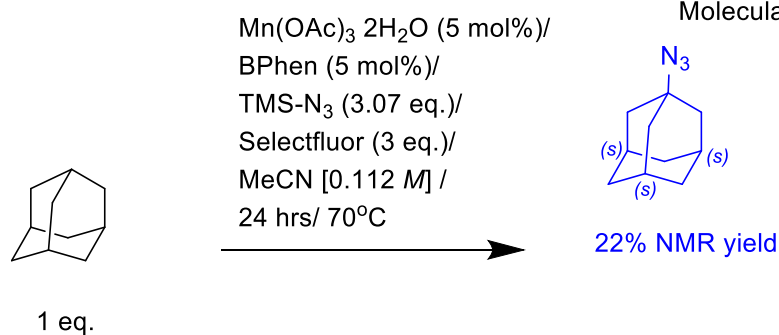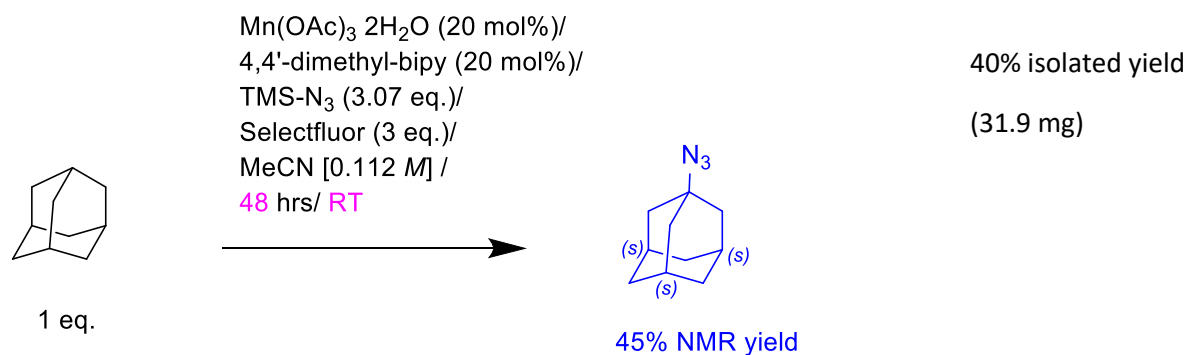

45% NMR yield

(3s,5s,7s)-1-azidoadamantane (also known as (3s,5s,7s)-1-adamantyl azide) has previously been characterized.<sup>[1, 16]</sup> The product was isolated as a white solid in 35% yield (27.9 mg) using conditions A [Fe] and 40% yield (31.9 mg) using conditions C [Mn]

$^1\text{H-NMR}$  (600 MHz,  $\text{CDCl}_3$ )  $\delta$  2.15 (s, 3H), 1.80 (d,  $J$  = 2.8 Hz, 6H), 1.71 – 1.61 (m, 6H).

$^{13}\text{C}\{^1\text{H}\}\text{-NMR}$  (151 MHz,  $\text{CDCl}_3$ )  $\delta$  59.0, 41.5, 35.9, 29.8.

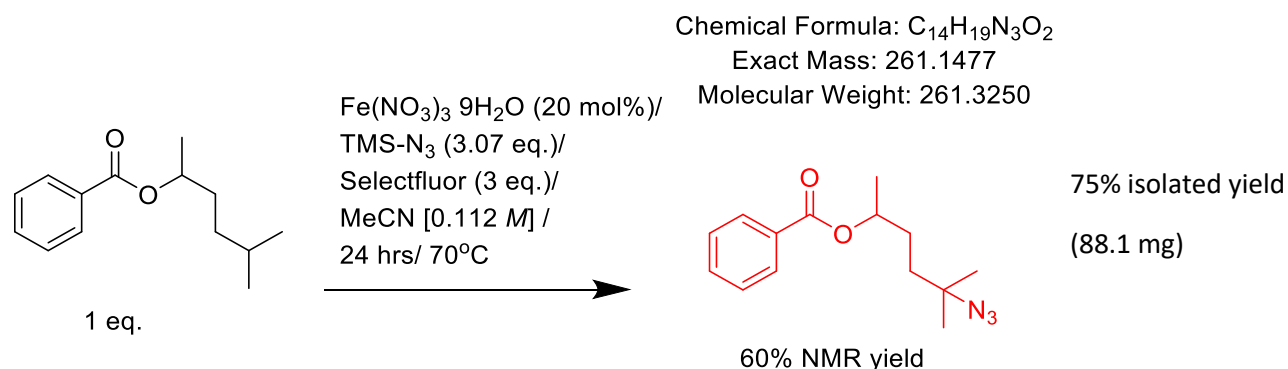

5-azido-5-methylhexan-2-yl benzoate (also known as 4-azido-1,4-dimethylpentyl benzoate) has previously been characterized.<sup>[1, 18]</sup> It was isolated as a colorless oil in 75% yield (88.1 mg) using conditions A [Fe] and 70% yield (82.2 mg) using conditions C [Mn].

$^1H$ -NMR (600 MHz,  $CDCl_3$ )  $\delta$  8.05 (d,  $J$  = 1.3 Hz, 2H), 7.54 (dd,  $J$  = 7.5, 1.6 Hz, 1H), 7.43 (t,  $J$  = 7.8 Hz, 2H), 5.18 – 5.10 (m, 1H), 1.82 – 1.77 (m, 1H), 1.71 (m, 1H), 1.62 (ddd,  $J$  = 13.6, 12.1, 4.5 Hz, 1H), 1.58 – 1.49 (m, 1H), 1.36 (d,  $J$  = 6.3 Hz, 3H), 1.27 (s, 6H).

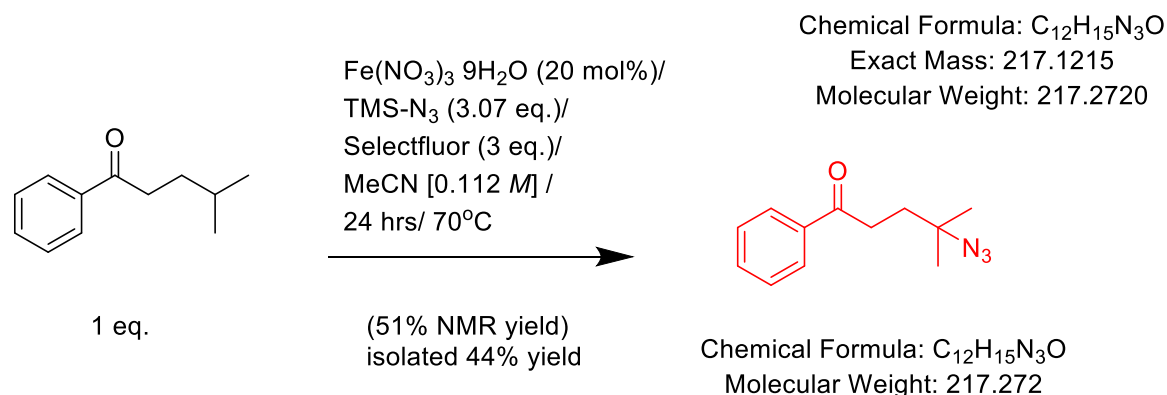

4-azido-4-methyl-1-phenylpentan-1-one (also known as 4-azido-4-methyl-1-phenyl-1-pentanone or 4-azido-4-methylvalerophenone) has previously been characterized.<sup>[18]</sup>

After purification with flash column chromatography on silica gel, the reaction produced a 44% isolated yield (42.6mg) of 4-azido-4-methyl-1-phenylpentan-1-one as a clear liquid. The reaction was also isolable in 41% yield (40.0 mg) using conditions C [Mn].

$^1H$ -NMR (600 MHz,  $CDCl_3$ )  $\delta$  7.93 – 7.89 (d,  $J$  = 8.4 Hz, 2H), 7.52 – 7.48 (t,  $J$  = 7.5 Hz, 1H), 7.40 (t,  $J$  = 7.7 Hz, 2H), 3.02 – 2.98 (m, 2H), 1.90 – 1.86 (m, 2H), 1.27 (s, 6H).

$^{13}\text{C}\{^1\text{H}\}$ -NMR (151 MHz,  $\text{CDCl}_3$ )  $\delta$  199.5, 136.8, 133.2, 128.7, 128.1, 61.1, 35.4, 33.6, 26.1.

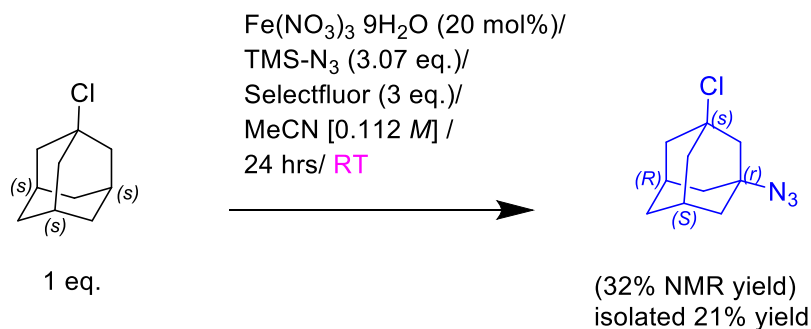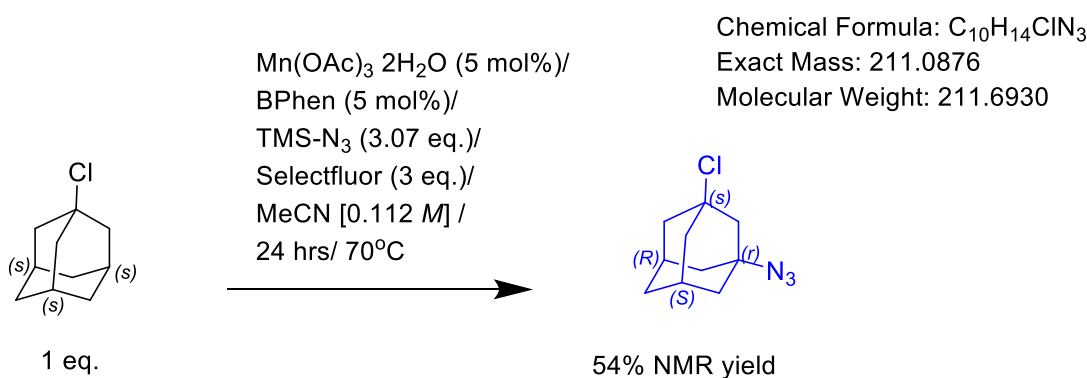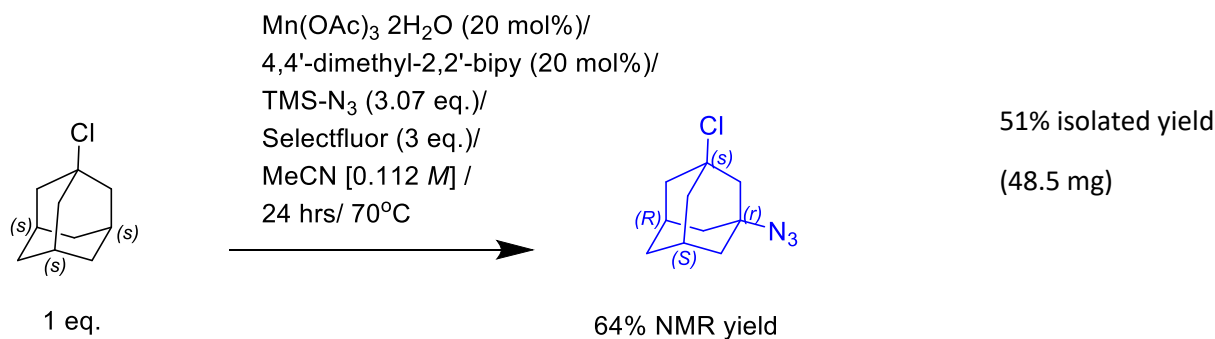

(1*r*,3*s*,5*R*,7*S*)-1-azido-3-chloroadamantane has previously been characterized.<sup>[2]</sup>

After purification with flash column chromatography on silica gel, the reaction produced a 21% isolated yield (19.8mg) of (1*r*,3*s*,5*R*,7*S*)-1-azido-3-chloroadamantane as a clear compound using Conditions A [Fe] and 51% yield (48.5 mg) using Conditions C [Mn].

$^1\text{H}$ -NMR (600 MHz,  $\text{CDCl}_3$ )  $\delta$  2.27 (s, 2H), 2.09 (s, 2H), 1.99 (q,  $J$  = 12.3 Hz, 4H), 1.70 (s, 3H), 1.53 (q,  $J$  = 12.0 Hz, 2H) 1.18 (s, br, 1H).  $^{13}\text{C}\{^1\text{H}\}$ -NMR (151 MHz,  $\text{CDCl}_3$ )  $\delta$  66.5, 60.4, 51.1, 46.0, 39.8, 34.0, 31.8.

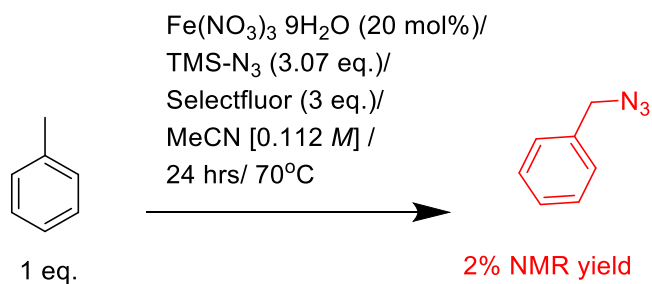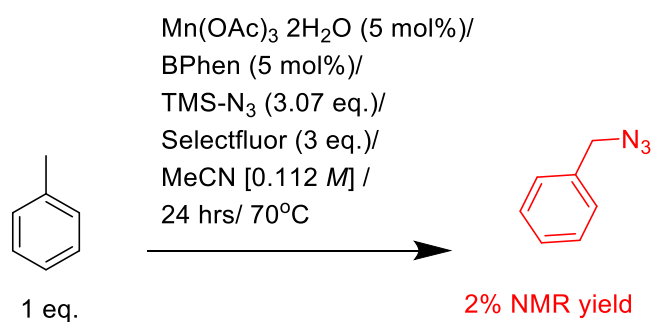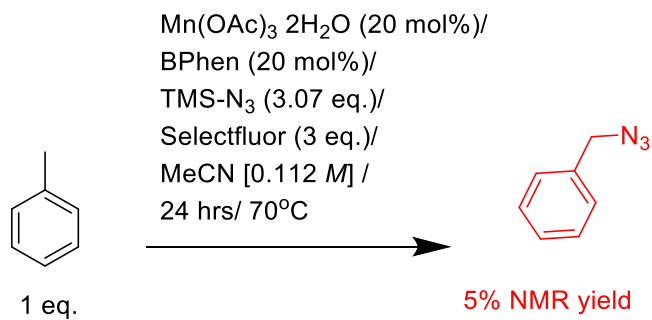

Benzyl azide (also known as either (azidomethyl)benzene or 1-(azidomethyl)benzene) has previously been characterized.<sup>[15, 17]</sup>

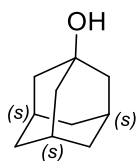

1 eq.

Fe(NO<sub>3</sub>)<sub>3</sub> 9H<sub>2</sub>O (20 mol%)/  
TMS-N<sub>3</sub> (3.07 eq.)/  
Selectfluor (3 eq.)/  
MeCN [0.112 M] /  
24 hrs/ RT

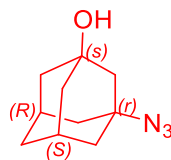

(20% NMR yield)  
isolated 17% yield

Chemical Formula: C<sub>10</sub>H<sub>15</sub>N<sub>3</sub>O  
Exact Mass: 193.1215  
Molecular Weight: 193.2500

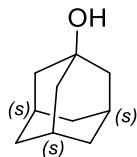

1 eq.

Mn(OAc)<sub>3</sub> 2H<sub>2</sub>O (5 mol%)/  
BPhen (5 mol%)/  
TMS-N<sub>3</sub> (3.07 eq.)/  
Selectfluor (3 eq.)/  
MeCN [0.112 M] /  
24 hrs/ 70°C

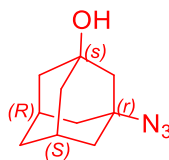

15% NMR yield

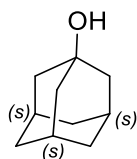

1 eq.

Mn(OAc)<sub>3</sub> 2H<sub>2</sub>O (20 mol%)/  
4,4'-dimethyl-2,2'-bipy (20 mol%)/  
TMS-N<sub>3</sub> (3.07 eq.)/  
Selectfluor (3 eq.)/  
MeCN [0.112 M] /  
24 hrs/ 70°C

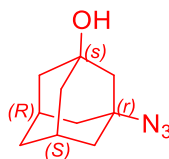

5% NMR yield

(1*s*,3*r*,5*R*,7*S*)-3-azidoadamantan-1-ol (also known as (1*r*,3*s*,5*R*,7*S*)-1-azidoadamantan-3-ol) has previously been characterized.<sup>[19]</sup>

After purification with flash column chromatography on silica gel, the reaction produced a 17% isolated yield (14.6mg) of (1*s*,3*r*,5*R*,7*S*)-3-azidoadamantan-1-ol as a white solid.

<sup>1</sup>H-NMR (600 MHz, CDCl<sub>3</sub>) δ 2.27 (s, br, 2H), 1.70 (s, 2H), 1.65 (s, br, 4H), 1.62 (s, br, 4H), 1.49 – 1.46 (s, br, 2H). <sup>13</sup>C{<sup>1</sup>H}-NMR (151 MHz, CDCl<sub>3</sub>) δ 69.6, 60.7, 49.1, 43.8, 40.2, 34.5, 30.3.

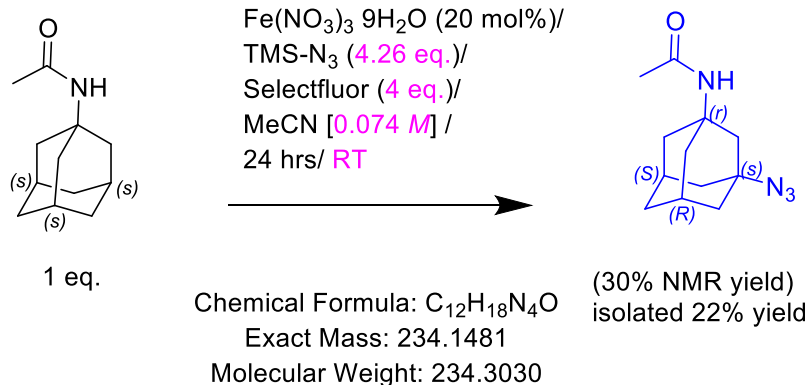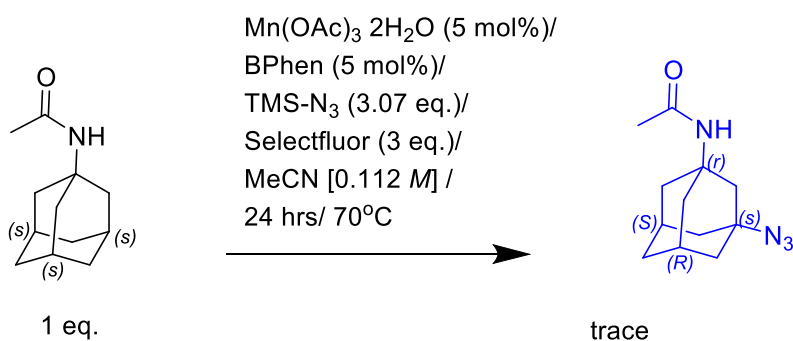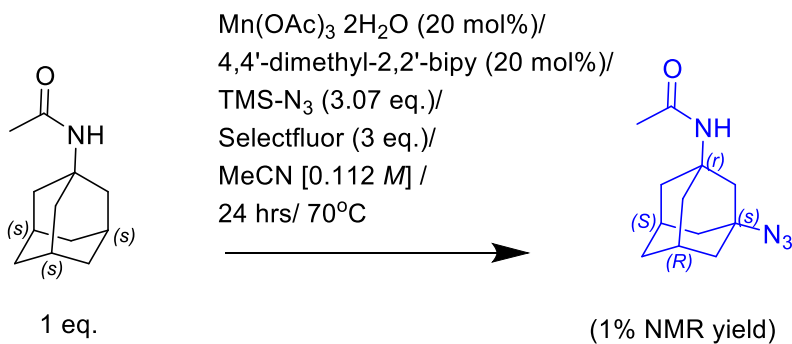

After purification with flash column chromatography on silica gel, the reaction produced a 22% isolated yield (23mg) of *N*-((1*r*,3*s*,5*R*,7*S*)-3-azidoadamantan-1-yl)acetamide as a white solid.

$^1\text{H-NMR}$  (600 MHz,  $\text{CDCl}_3$ )  $\delta$  2.22 (s, 2H), 2.01 (s, 2H), 1.91 (s, 3H), 1.86-1.81 (m, 4H), 1.71 (d,  $J$  = 11.9 Hz, 2H), 1.67 (d,  $J$  = 12.2 Hz, 2H), 1.56 (d,  $J$  = 13.2 Hz, 1H), 1.50 (d,  $J$  = 13.2 Hz, 1H).

$^{13}\text{C}\{^1\text{H}\}\text{-NMR}$  (151 MHz,  $\text{CDCl}_3$ )  $\delta$  169.5, 59.6, 53.4, 45.1, 41.6, 40.5, 40.2, 36.3, 34.8, 30.0, 29.4, 24.6.

HRAPCIMS  $m/z$  207.1492 [ $\text{M-N}_2+\text{H}$ ] $^+$  (calcd for  $\text{C}_{12}\text{H}_{18}\text{N}_2\text{O}_1+\text{H}^+$ , 207.1497).

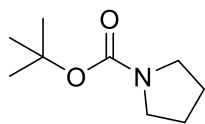

1 eq.

Fe(NO<sub>3</sub>)<sub>3</sub>·9H<sub>2</sub>O (20 mol%)/  
TMS-N<sub>3</sub> (3.07 eq.)/  
Selectfluor (3 eq.)/  
MeCN [0.112 M] /  
48 hrs/ ice bath to RT

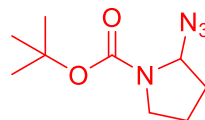

(54% NMR yield)

Chemical Formula: C<sub>9</sub>H<sub>16</sub>N<sub>4</sub>O<sub>2</sub>

Exact Mass: 212.1273

Molecular Weight: 212.2530

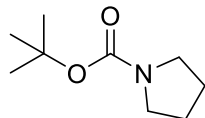

1 eq.

Mn(OAc)<sub>3</sub>·2H<sub>2</sub>O (5 mol%)/  
BPhen (5 mol%)/  
TMS-N<sub>3</sub> (3.07 eq.)/  
Selectfluor (3 eq.)/  
MeCN [0.112 M] /  
24 hrs/ 70°C

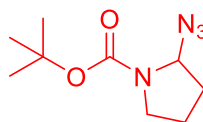

(17% NMR yield)

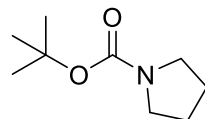

1 eq.

Mn(OAc)<sub>3</sub>·2H<sub>2</sub>O (5 mol%)/  
BPhen (5 mol%)/  
TMS-N<sub>3</sub> (3.07 eq.)/  
Selectfluor (3 eq.)/  
MeCN [0.112 M] /  
24 hrs/ RT

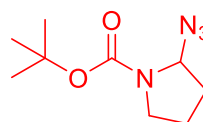

(43% NMR yield)

*Tert*-butyl 2-azidopyrrolidine-1-carboxylate (also known as 1-Boc-2-azidopyrrolidine, 1-Boc- $\alpha$ -azidopyrrolidine, or 1-Boc-pyrrolidin-2-yl azide) has previously been characterized.<sup>[11]</sup>

<sup>1</sup>H-NMR (600 MHz, CDCl<sub>3</sub>)  $\delta$  5.53 – 5.38 (m, 1H), 3.60 – 3.46 (m, 1H), 3.34 – 3.25 (m, 1H), 2.25 – 2.11 (m, 1H), 1.95 – 1.80 (m, 3H), 1.52 – 1.48\* (m, 9H). \*multiple rotamers present at RT in CDCl<sub>3</sub>



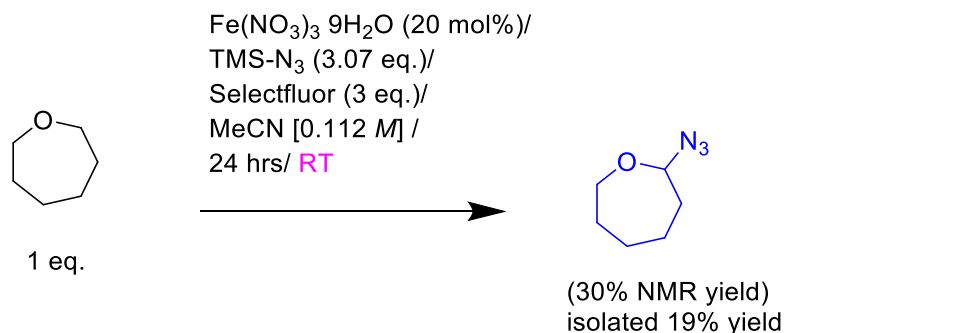

Chemical Formula:  $C_6H_{11}N_3O$   
 Exact Mass: 141.0902  
 Molecular Weight: 141.1740

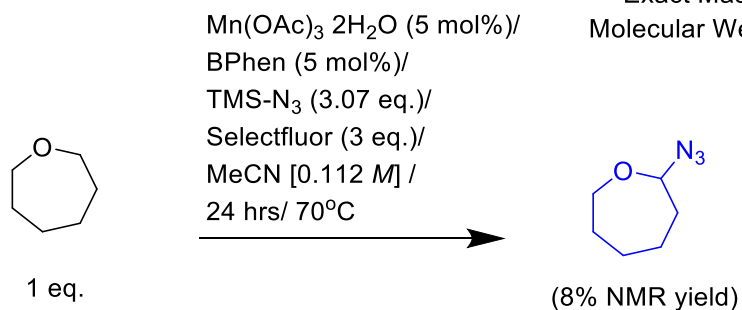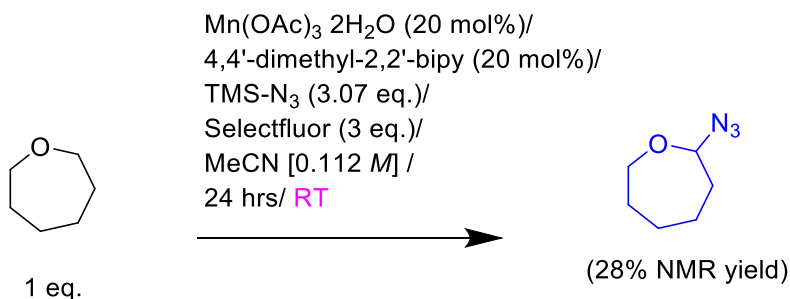

After purification with flash column chromatography on silica gel, the reaction produced a 19% isolated yield (12mg) of 2-azidooxepane (also known as 2-oxepanyl azide, 2-azidohexamethylene oxide,  $\alpha$ -azidooxepane, or  $\alpha$ -azidohexamethylene oxide).

$^1H$ -NMR (600 MHz,  $CDCl_3$ )  $\delta$  5.17 (apparent dd,  $J$  = 9.6, 5.2 Hz, 1H), 3.85 (ddd,  $J$  = 12.6, 10.6, 1.9 Hz, 1H), 3.73 (dddd,  $J$  = 12.7, 4.5, 3.3, 1.3 Hz, 1H), 2.02 (dddq,  $J$  = 14.6, 7.9, 5.2, 1.5 Hz, 1H), 1.84 – 1.80 (m, 1H), 1.77 – 1.69 (m, 2H), 1.67 – 1.57 (m, 2H), 1.45 (dt,  $J$  = 13.1, 11.0, 1.7 Hz, 1H), 1.36 (dtdd,  $J$  = 14.2, 11.7, 4.5, 2.6 Hz, 1H).  $^{13}C\{^1H\}$ -NMR (151 MHz,  $CDCl_3$ )  $\delta$  91.7, 64.2, 34.7, 30.6, 28.9, 23.0.  
 HRAPCIMS  $m/z$  114.0916 [ $M-N_2+H$ ] $^+$  (calcd for  $C_6H_{11}N_1O_1+H^+$ , 114.0919).

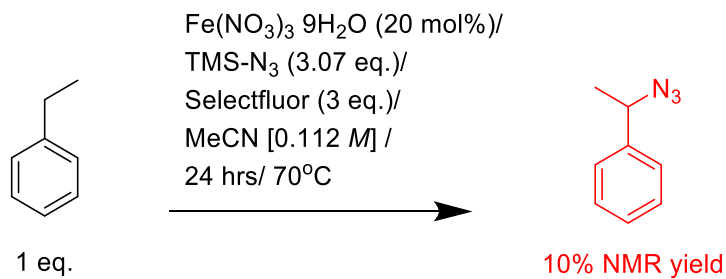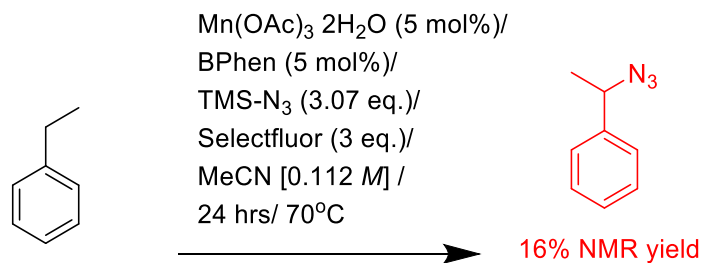

Chemical Formula:  $\text{C}_8\text{H}_9\text{N}_3$   
 Exact Mass: 147.0796  
 Molecular Weight: 147.1810

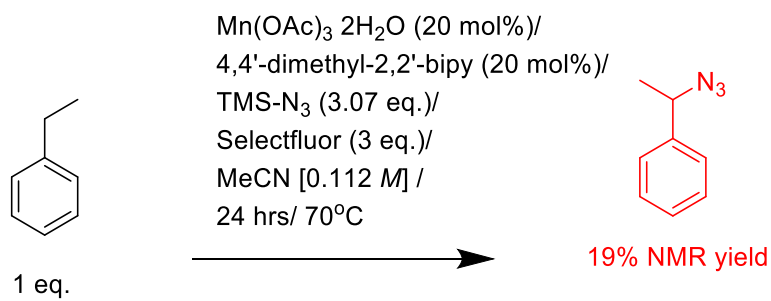

1-azidoethylbenzene (also known as 1-phenylethyl azide,  $\alpha$ -methylbenzyl azide, or 1-azido-1-phenylethane) has previously been characterized.<sup>[12]</sup>

$^1\text{H}$ -NMR (600 MHz,  $\text{CDCl}_3$ )  $\delta$  7.30 (m, 2H), 7.25 (m, 3H), 4.58 (q,  $J$  = 6.8 Hz, 1H) 1.45 (d,  $J$  = 6.8 Hz, 3H).

$^{13}\text{C}\{^1\text{H}\}$ -NMR (151 MHz,  $\text{CDCl}_3$ )  $\delta$  140.8, 128.8, 128.1, 126.4, 61.1, 21.6.

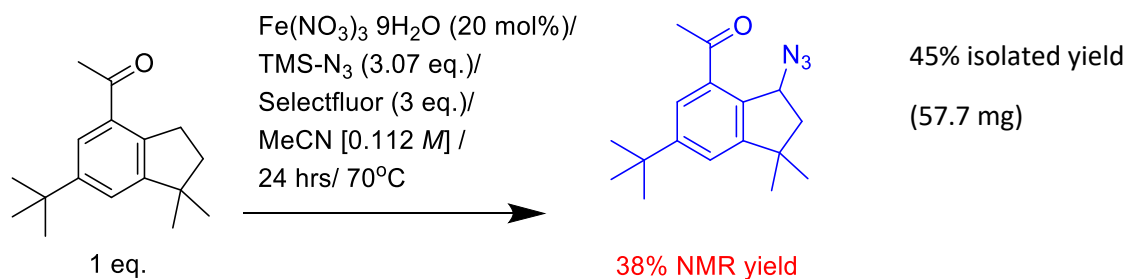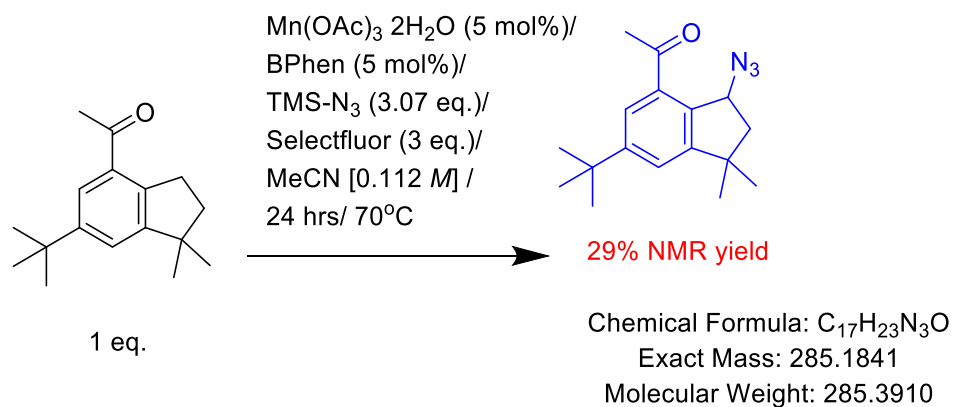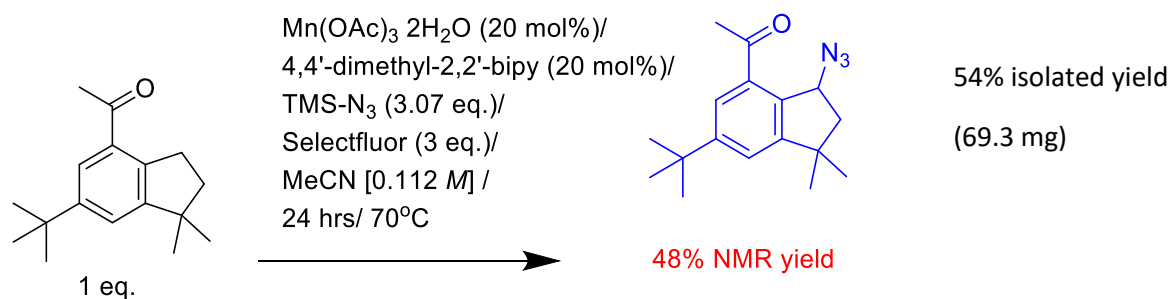

3-azido-celestolide (also known as 1-(3-azido-6-(*tert*-butyl)-1,1-dimethyl-2,3-dihydro-1*H*-inden-4-yl)ethan-1-one or 4-acetyl-3-azido-6-*tert*-butyl-1,1-dimethylindan) has previously been characterized.<sup>[13]</sup> It was isolated as a colorless oil in 45% yield (57.7 mg) using Conditions A [Fe] and 54% yield (69.3 mg) using conditions C [Mn]

<sup>1</sup>H-NMR (600 MHz, CDCl<sub>3</sub>) δ 7.66 (d, *J* = 1.7 Hz, 1H), 7.31 (d, *J* = 1.7 Hz, 1H), 5.46 (dd, *J* = 7.4, 1.7 Hz, 1H), 2.53 (s, 3H), 2.05 (dd, *J* = 13.7, 7.4 Hz, 1H), 1.95 (dd, *J* = 13.6, 1.7 Hz, 1H) 1.36 (s, 9H), 1.31 (d, *J* = 9.0 Hz, 6H)

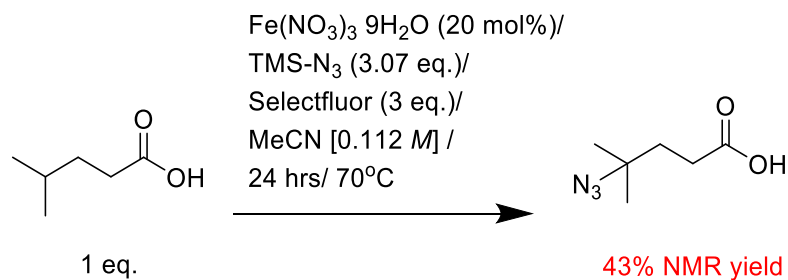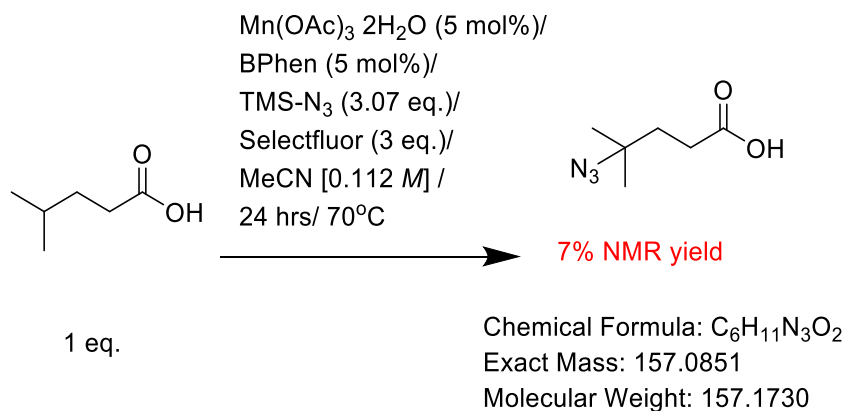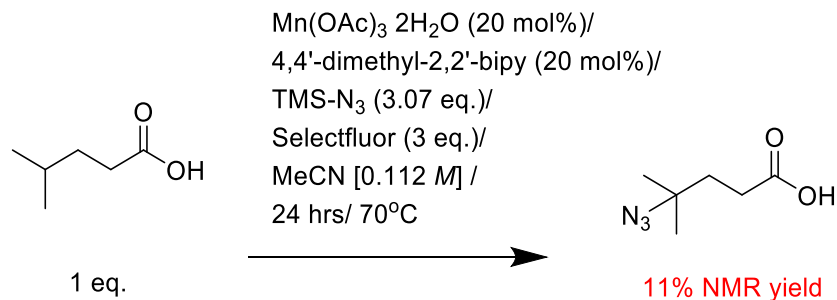

4-azido-4-methylpentanoic acid (also known as 4-azido-4-methylvaleric acid or 4-azidoisocaproic acid) has previously been characterized.<sup>[18, 20]</sup>

<sup>1</sup>H-NMR (600 MHz, CDCl<sub>3</sub>) δ 2.55 (t, *J* = 8.1 Hz, 2H), 1.98 (t, *J* = 8.0 Hz, 2H), 1.36 (s, 6H).

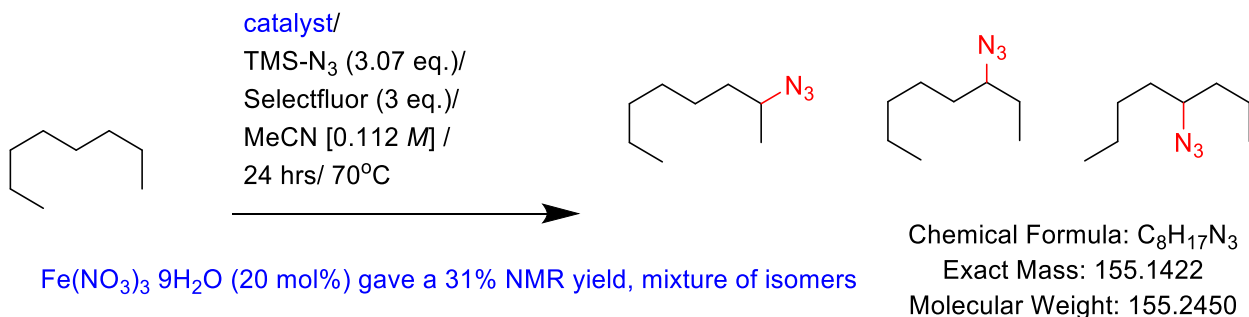

Fe(NO<sub>3</sub>)<sub>3</sub> 9H<sub>2</sub>O (20 mol%) gave a 31% NMR yield, mixture of isomers

Fe(OTf)<sub>3</sub> (30 mol%) gave a 43% NMR yield, mixture of isomers

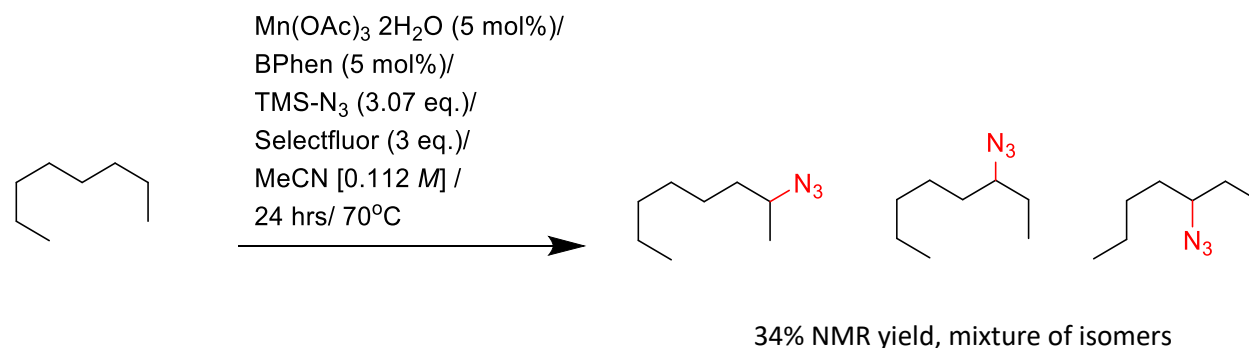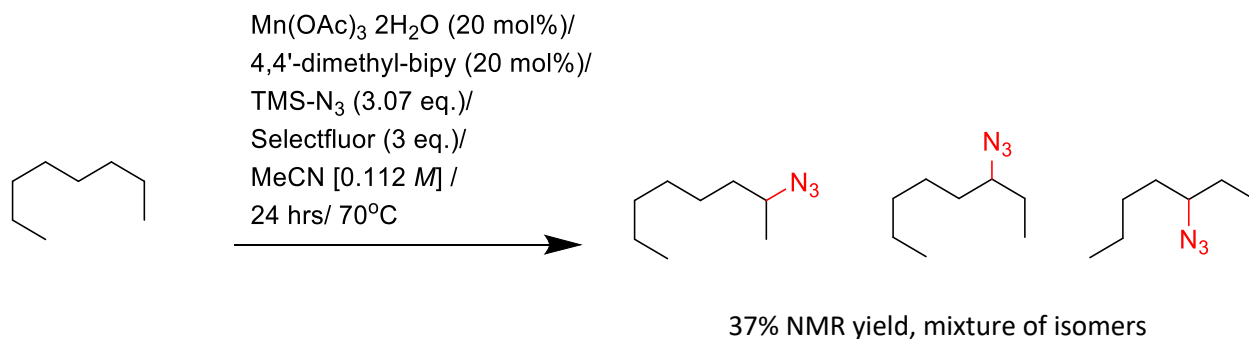

After purification with flash column chromatography on silica gel, the reaction produced a mixture of the following isomers: 2-azidooctane, 3-azidooctane, and 4-azidooctane. 2-azidooctane, 3-azidooctane, and 4-azidooctane have all previously been characterized.<sup>[1,8]</sup> They are characterized here as an inseparable mixture. <sup>1</sup>H-NMR (600 MHz, CDCl<sub>3</sub>) δ 3.47 – 3.36 (m, 0.33H), 3.23 (m, 0.33H), 3.17 (m, 0.33H), 1.61 – 1.42 (m, 5H), 1.34 – 1.25 (m, 5H), 1.00 – 0.86 (m, 6H).

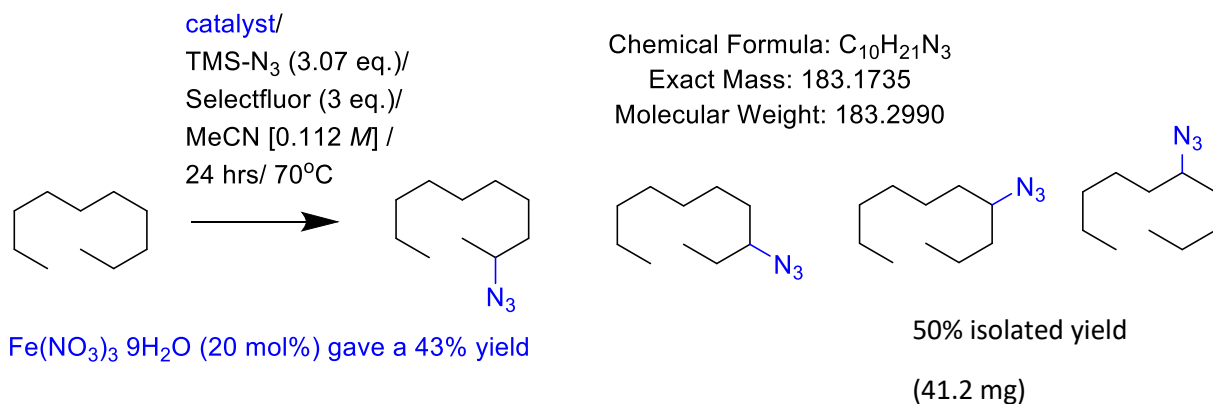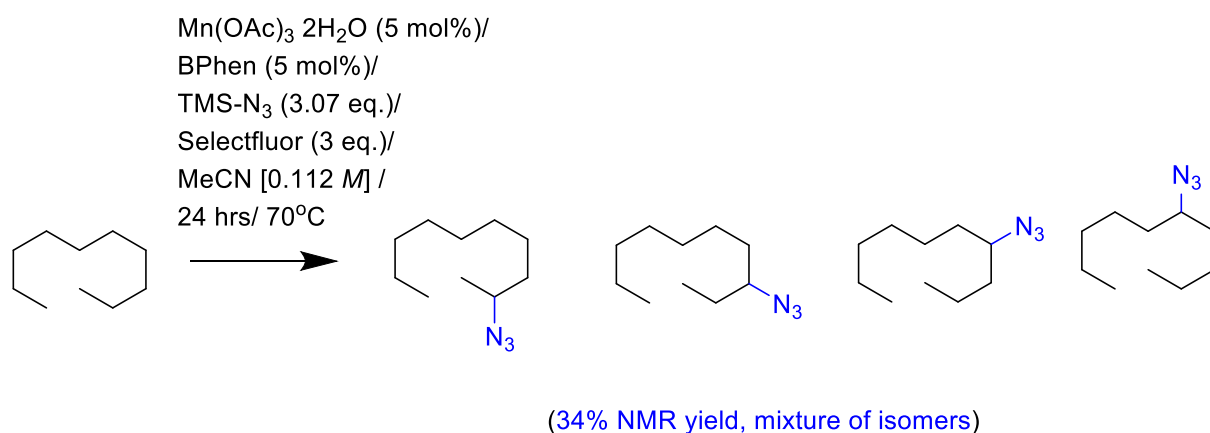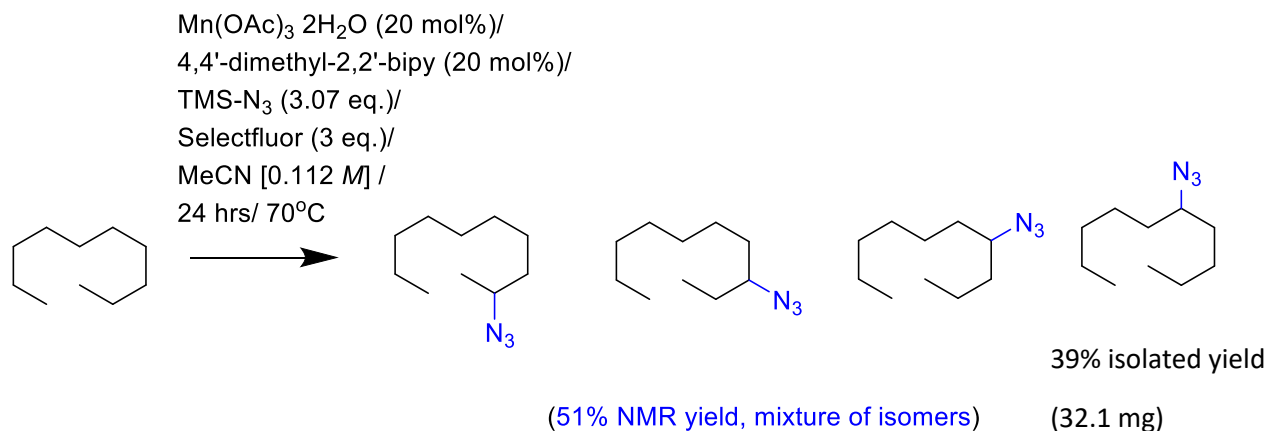

After purification with flash column chromatography on silica gel, the reaction produced the following isomers: 2-azidodecane, 3-azidodecane, 4-azidodecane, and 5-azidodecane. The HRAPCIMS for the mixture of 2-azidodecane, 3-azidodecane, 4-azidodecane, and 5-azidodecane has previously been reported.<sup>[1]</sup> They are characterized here as an inseparable mixture and were isolated as a colorless oil in 50% yield (41.2 mg) using conditions A [Fe] replacing 20%  $\text{Fe}(\text{NO}_3)_3 \cdot 9\text{H}_2\text{O}$  with 30%  $\text{Fe}(\text{OTf})_3$  and 40% yield (31.9 mg) using Conditions C [Mn].  $^1\text{H-NMR}$  (600 MHz,  $\text{CDCl}_3$ )  $\delta$  3.41 (h,  $J$  = 6.6 Hz, 0.1H), 3.29 – 3.15 (m, 0.9H), 1.68 – 1.22 (m, 14.5H), 1.04 – 0.85 (m, 5.5H).  $^{13}\text{C}\{^1\text{H}\}$ -NMR (151 MHz,  $\text{CDCl}_3$ )  $\delta$  64.6, 63.2, 62.9, 58.1, 36.6, 36.20 34.42, 34.38, 34.1, 34.0, 31.9, 31.8, 31.74, 31.65, 29.5, 29.43, 29.40, 29.24,

29.20, 29.1, 28.3, 27.4, 26.2, 26.1, 25.8, 22.67, 22.65, 22.59, 22.56, 22.55, 19.5, 19.4, 14.10, 14.09, 14.06, 14.01, 13.99, 13.89, 10.5.

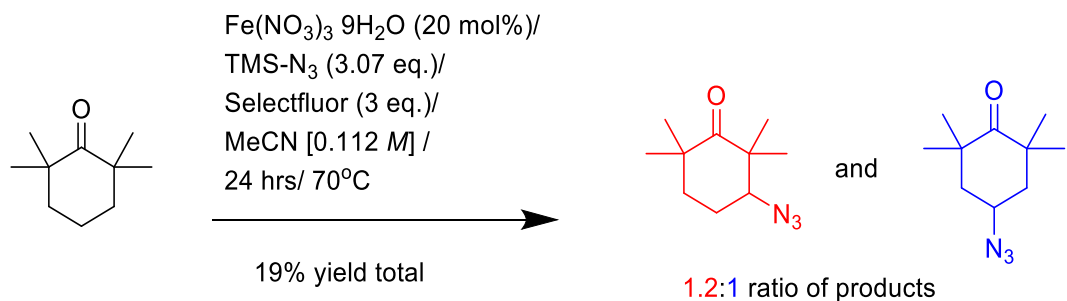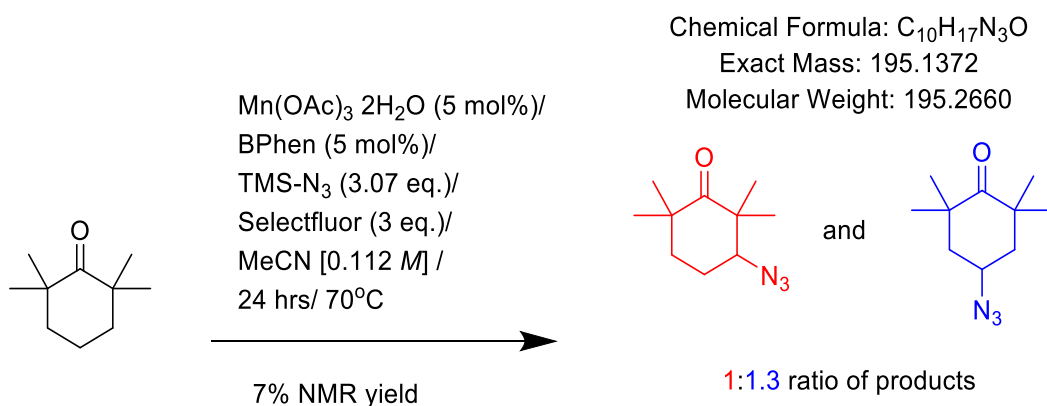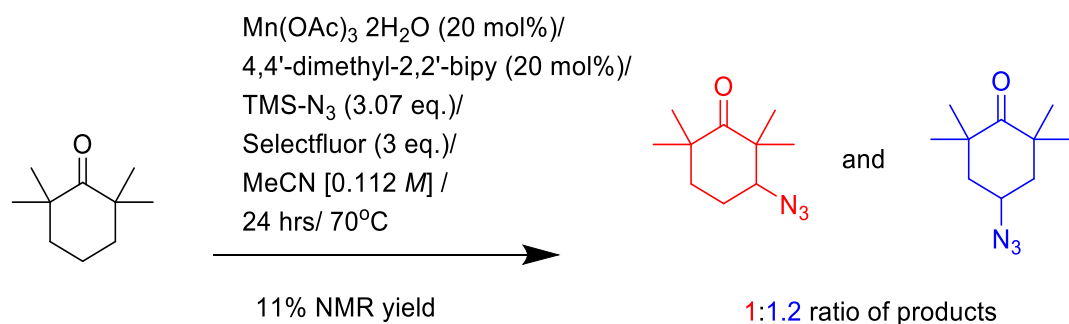

After purification with flash column chromatography on silica gel, the reaction produced a mixture of 3-azido-2,2,6,6-tetramethylcyclohexan-1-one (also known as 3-azido-2,2,6,6-tetramethylcyclohexanone) and 4-azido-2,2,6,6-tetramethylcyclohexan-1-one (also known as 4-azido-2,2,6,6-tetramethylcyclohexanone).  $^1\text{H}$ -NMR (600 MHz,  $\text{C}_6\text{D}_6$ )  $\delta$  3.37 (tt,  $J = 11.7, 4.1$  Hz, 0.45H), 2.83 (dd,  $J = 8.9, 4.6$  Hz, 0.55H), 1.58 – 1.53 (m, 1H), 1.47 – 1.41 (m, 1H), 1.39 – 1.25 (m, 5H), 1.04 (s, 1.5H), 0.97 (s, 1.5H), 0.95 (s, 1.5H), 0.92 (s, 1.5H), 0.86 (s, 1.5H), 0.77 (s, 1.5H).  $^{13}\text{C}\{^1\text{H}\}$ -NMR (151 MHz,  $\text{C}_6\text{D}_6$ )  $\delta$  215.4, 215.0, 68.5, 52.6, 49.3, 44.1, 43.3, 43.0, 34.6, 29.9, 27.5, 27.4, 27.3, 26.9, 24.7, 22.6, 21.8. HRAPCIMS  $m/z$  168.138  $[\text{M}-\text{N}_2+\text{H}]^+$  (calcd for  $\text{C}_{10}\text{H}_{18}\text{N}_1\text{O}_1$ , 168.1388).

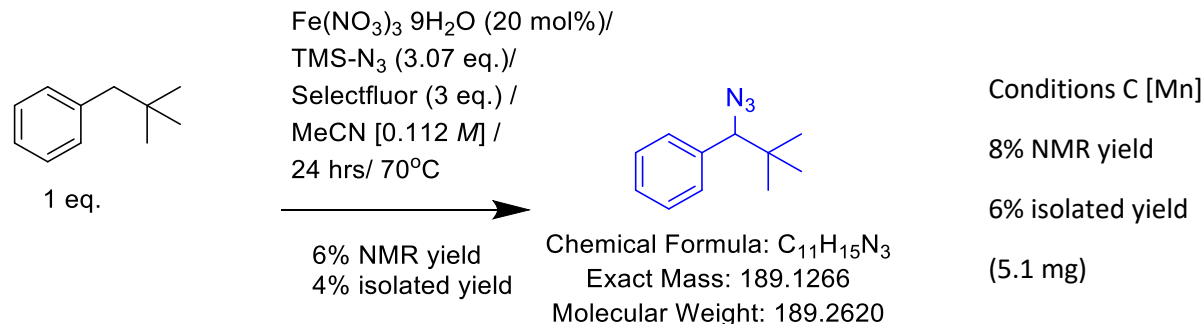

After purification with flash column chromatography on silica gel, the reaction produced a 4% isolated yield (3.4 mg) of (1-azido-2,2-dimethylpropyl)benzene (which is also known as 1-azido-1-phenyl-2,2-dimethylpropane) using conditions A [Fe] and 6% isolated yield (5.1 mg) using Conditions C [Mn]. This compound has previously been characterized.<sup>[14]</sup>

<sup>1</sup>H-NMR (600 MHz, CDCl<sub>3</sub>) δ 7.36 – 7.33 (m, 2H), 7.32 – 7.30 (m, 1H), 7.27 – 7.24 (m, 2H), 4.28 (s, 1H), 0.91 (s, 9H). <sup>13</sup>C{<sup>1</sup>H}-NMR (151 MHz, CDCl<sub>3</sub>) δ 137.6, 128.5, 127.9, 127.8, 74.4, 35.8, 26.4.

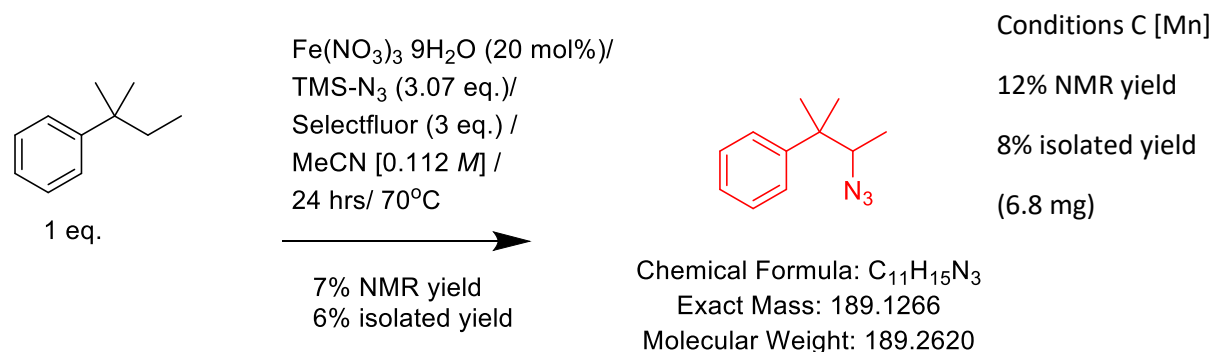

After purification with flash column chromatography on silica gel, the reaction produced a 6% isolated yield (5mg) of (3-azido-2-methylbutan-2-yl)benzene (also known as either (2-methyl-2-phenyl-butan-3-yl)azide or 3-azido-2-phenyl-2-methylbutane) using Conditions A [Fe] and 8% isolated yield (6.8 mg) using conditions C [Mn].

<sup>1</sup>H-NMR (600 MHz, CDCl<sub>3</sub>) δ 7.29 – 7.24 (m, 4H), 7.18 – 7.14 (m, 1H), 3.61 (q, *J* = 6.7 Hz, 1H), 1.29 (s, 3H), 1.26 (s, 3H), 1.00 (d, *J* = 6.7 Hz, 3H).

<sup>13</sup>C{<sup>1</sup>H}-NMR (151 MHz, CDCl<sub>3</sub>) δ 146.3, 128.2, 126.4, 126.3, 67.2, 42.3, 25.9, 23.1, 14.7.

HRAPCIMS *m/z* 162.1277 [M-N<sub>2</sub>+H]<sup>+</sup> (calcd for C<sub>11</sub>H<sub>15</sub>N<sub>1</sub>+H<sup>+</sup>, 162.1283).



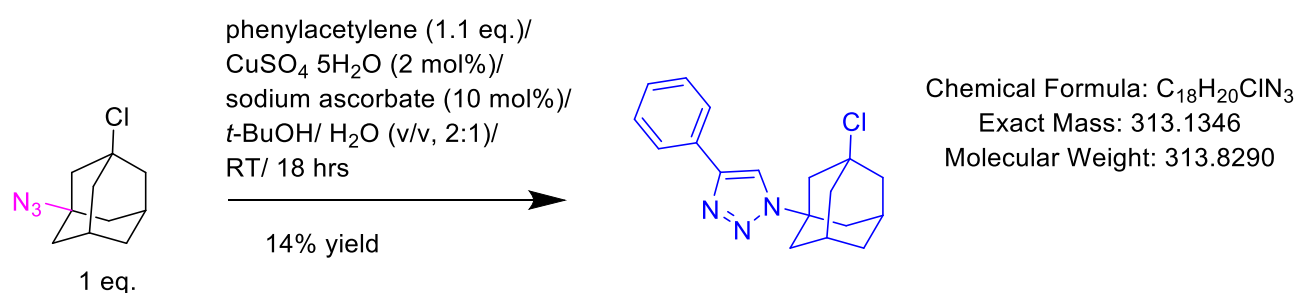

Applying the previously published literature,<sup>[21]</sup> 1 eq. of (1*r*,3*s*,5*R*,7*S*)-1-azido-3-chloroadamantane (95 mg, 0.000449 mol = 0.449 mmol) was dissolved in 1.33 mL *tert*-butanol and 0.66 mL water. Then, 1.1 eq of phenylacetylene (0.000494 mol = 0.494 mmol, 0.054 mL) was added to the vial. Next 10 mol% sodium ascorbate (0.0000449 mol = 0.0449 mol, 8.89 mg) was added to the vial. Finally, 2 mol% CuSO<sub>4</sub> 5H<sub>2</sub>O (0.0000089 mol = 0.0089 mmol, 2.2 mg) was added to the vial. The vial was stirred vigorously for 18 hours at RT. Then the mixture was extracted with DCM and water three times. The DCM layers were combined and dried over anhydrous Na<sub>2</sub>SO<sub>4</sub>. Then the Na<sub>2</sub>SO<sub>4</sub> was filtered off, and the organic layer was concentrated on the Rotary Evaporator. Finally, the crude compound was purified by flash column chromatography on silica gel to give a 14% yield (20 mg) of 1-((1*r*,3*s*,5*R*,7*S*)-3-chloroadamantan-1-yl)-4-phenyl-1*H*-1,2,3-triazole as a white solid.

<sup>1</sup>H-NMR (600 MHz, CDCl<sub>3</sub>) δ 7.84 – 7.83 (m, 1H), 7.83 – 7.82 (m, 1H), 7.82 (s, 1H), 7.44 – 7.40 (m, 2H), 7.34 – 7.31 (m, 1H), 2.65 (s, 2H), 2.50-2.46 (m, 2H), 2.27 (s, br, 4H), 2.21 (d, *J* = 3.1 Hz, 4H), 1.75 (d, br, *J* = 3.2 Hz, 2H). <sup>13</sup>C{<sup>1</sup>H}-NMR (151 MHz, CDCl<sub>3</sub>) δ 147.1, 130.8, 128.8, 128.1, 125.7, 116.0, 65.8, 61.3, 52.1, 46.1, 41.3, 34.0, 31.5.

# Crude $^1\text{H}$ -NMR of azidocyclooctane

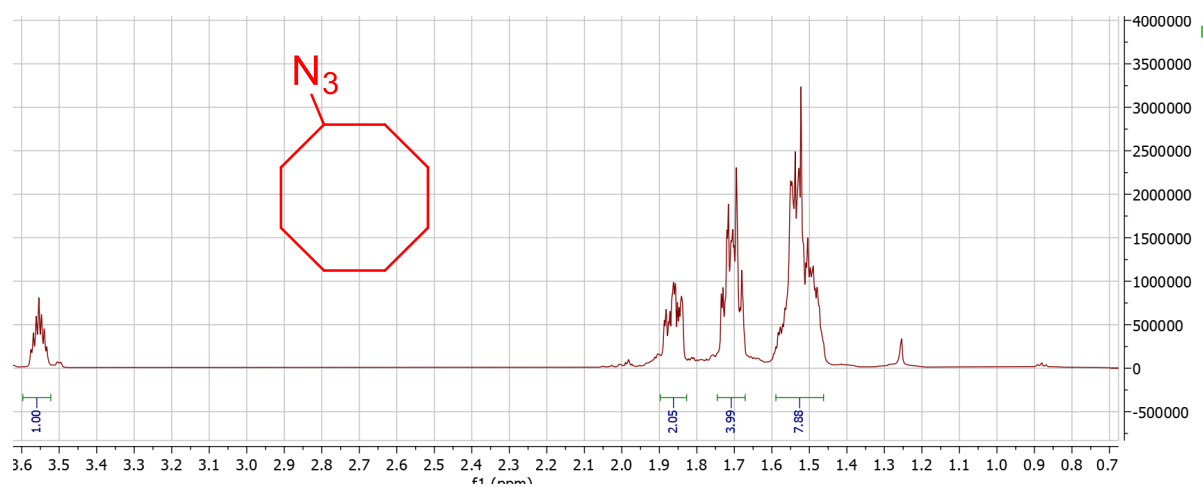

# Crude $^1\text{H}$ -NMR of bromocyclooctane

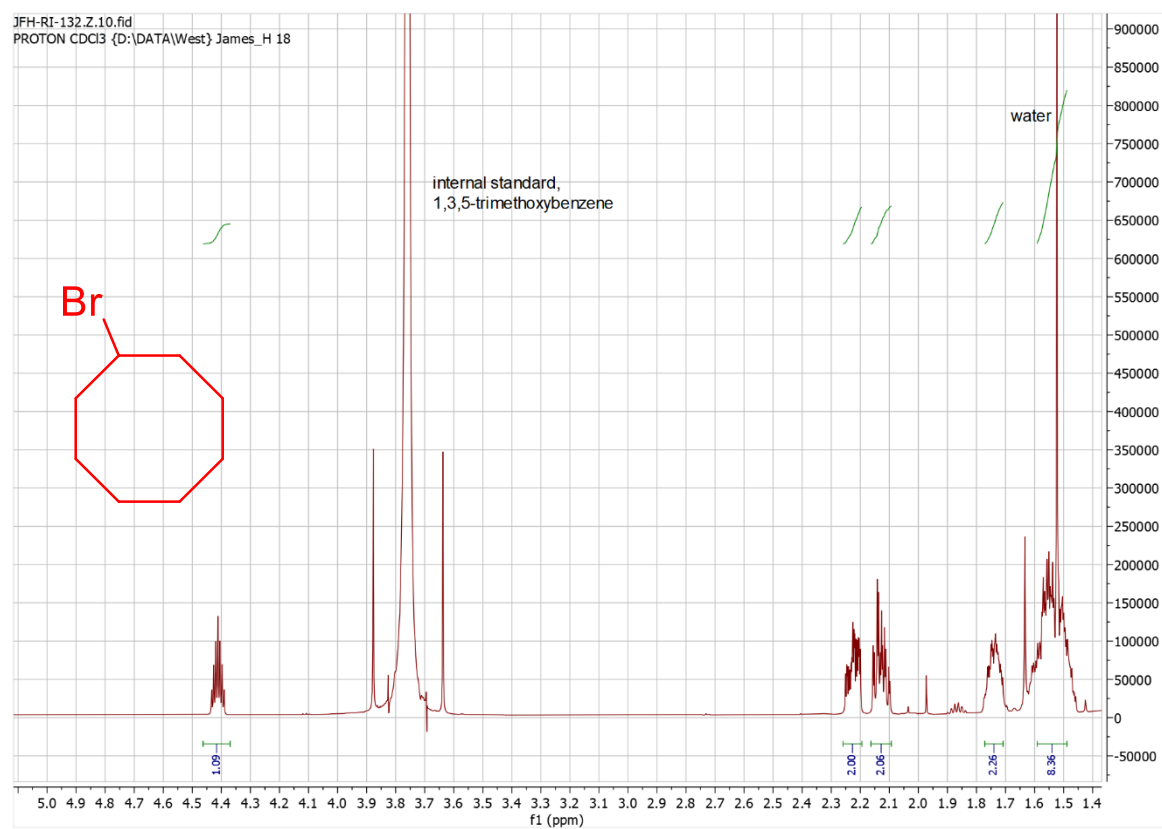

## Crude $^1\text{H}$ -NMR of chlorocyclooctane

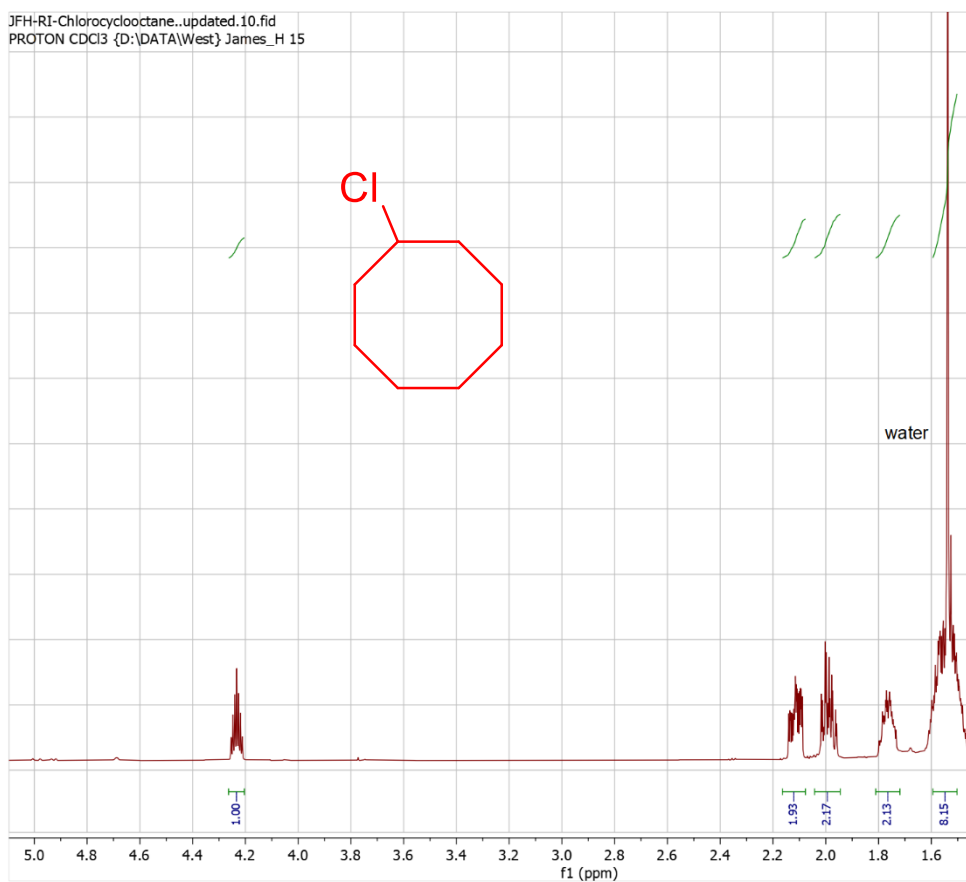

## Crude $^1\text{H}$ -NMR of cyclooctanone

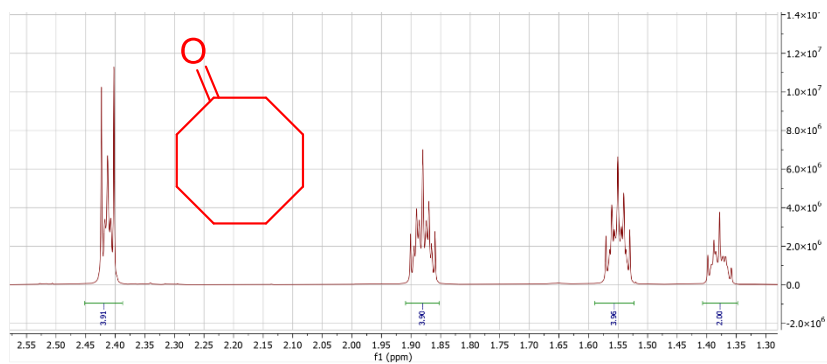

### Crude $^1\text{H}$ -NMR of fluorocyclooctane

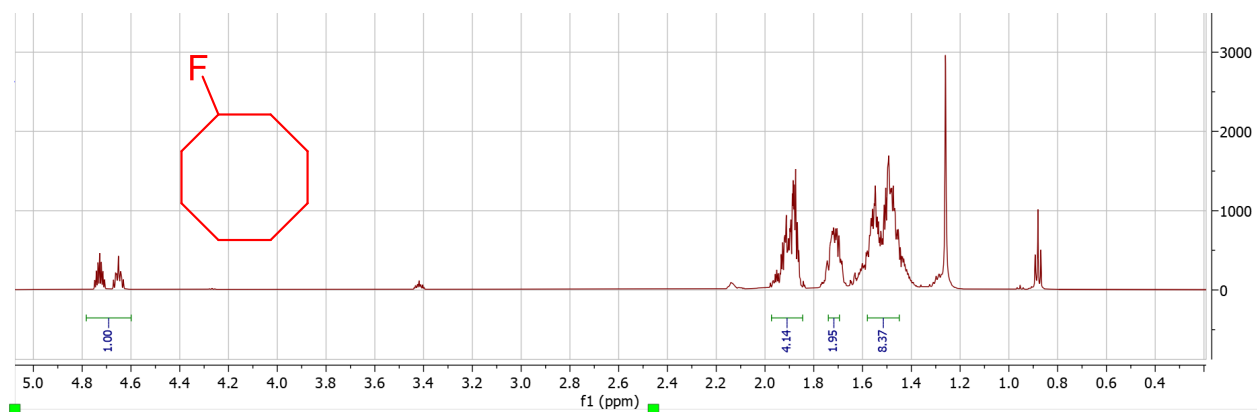

### Crude $^1\text{H}$ -NMR of 2-azidooctane, 3-azidooctane, and 4-azidooctane

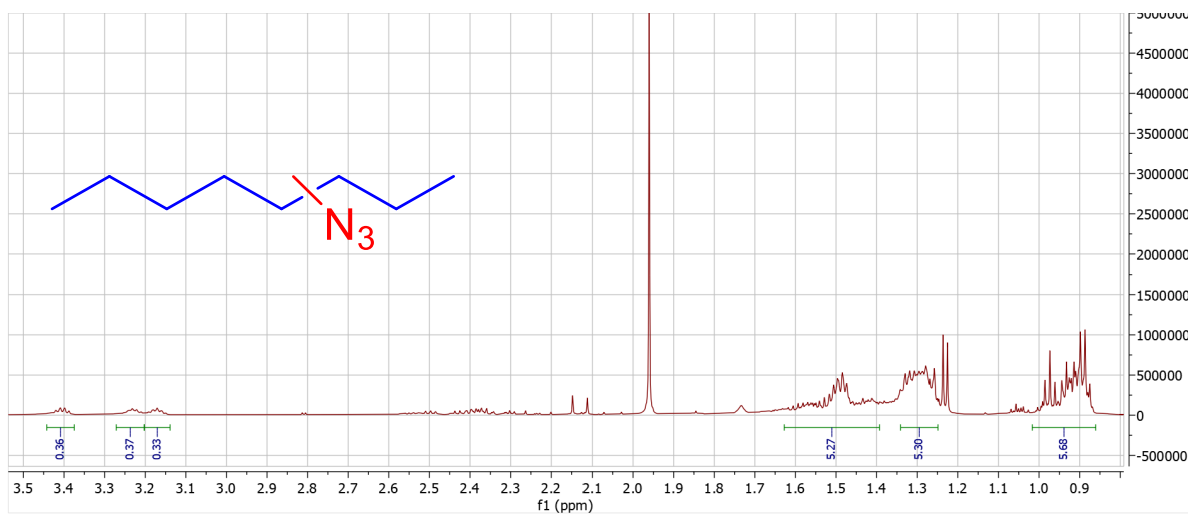

$^1\text{H}$ -NMR of 2-azidodecane, 3-azidodecane, 4-azidodecane, and 5-azidodecane, full spectrum

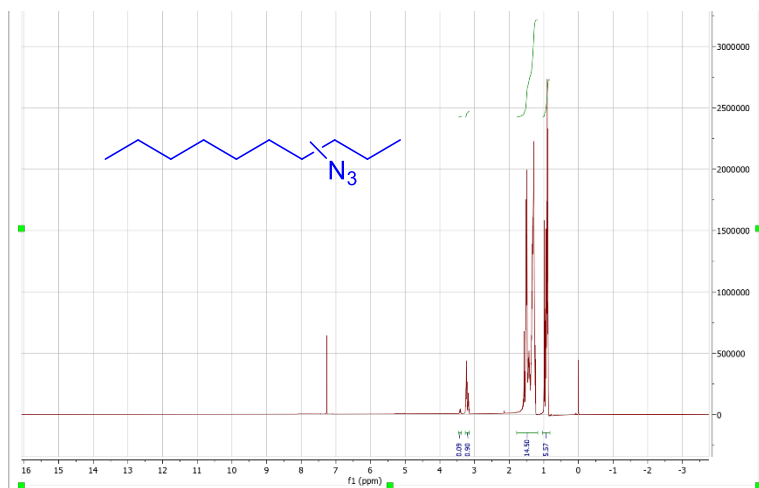

$^1\text{H}$ -NMR of 2-azidodecane, 3-azidodecane, 4-azidodecane, and 5-azidodecane, magnified spectrum

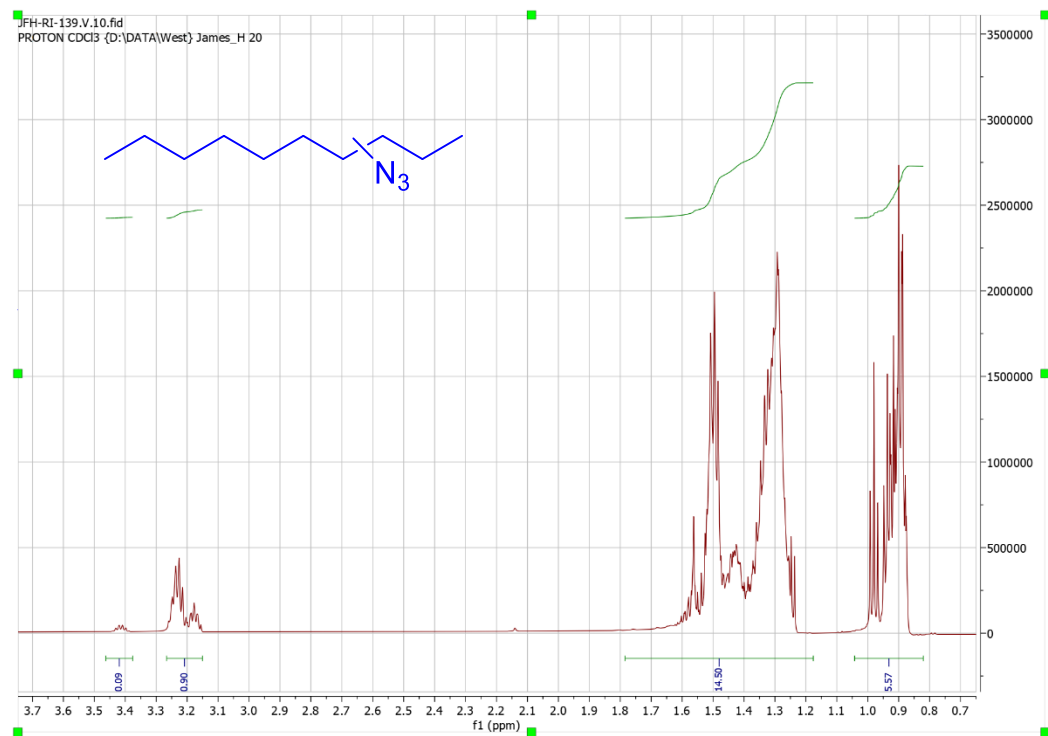

$^{13}\text{C}\{^1\text{H}\}$ -NMR of 2-azidodecane, 3-azidodecane, 4-azidodecane, and 5-azidodecane

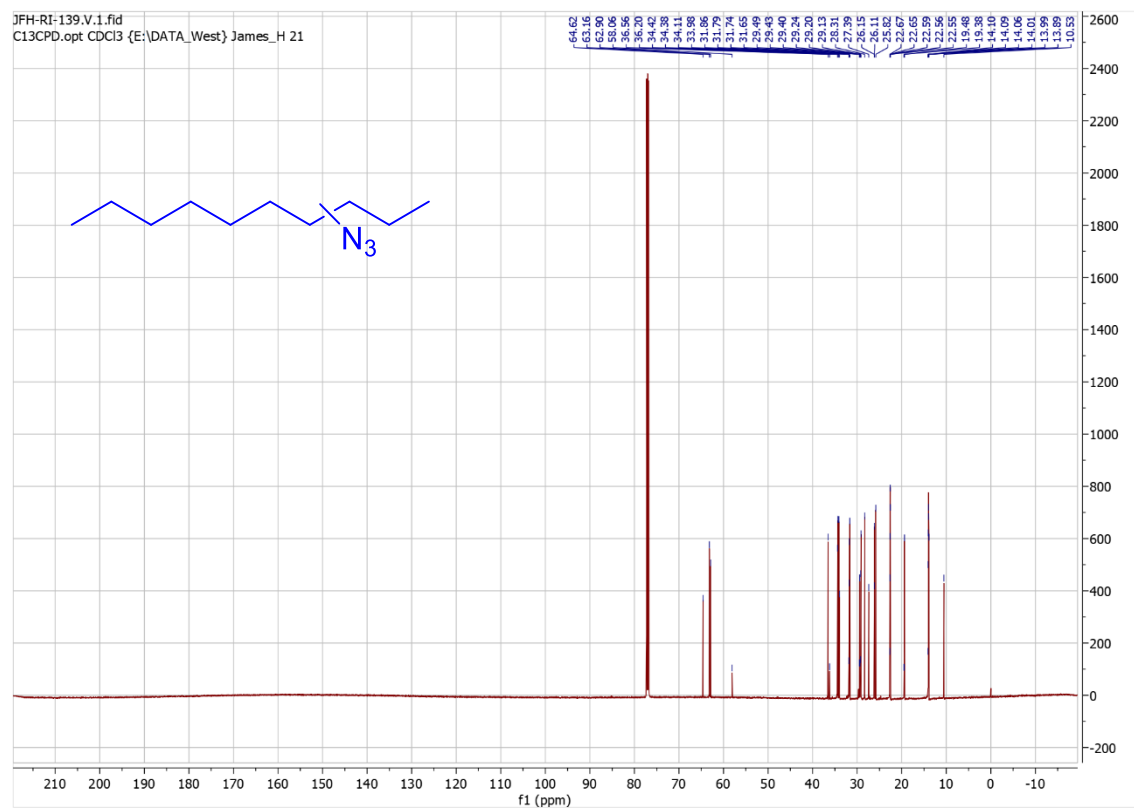

$^1\text{H}$ -NMR of (3s,5s,7s)-1-azidoadamantane

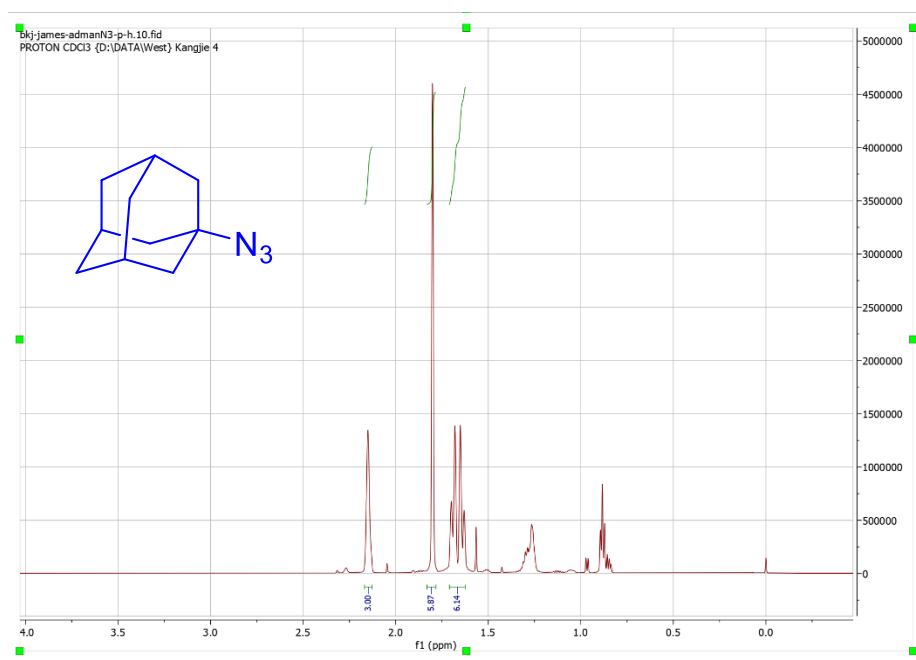

$^{13}\text{C}\{^1\text{H}\}$ -NMR of (3s,5s,7s)-1-azidoadamantane

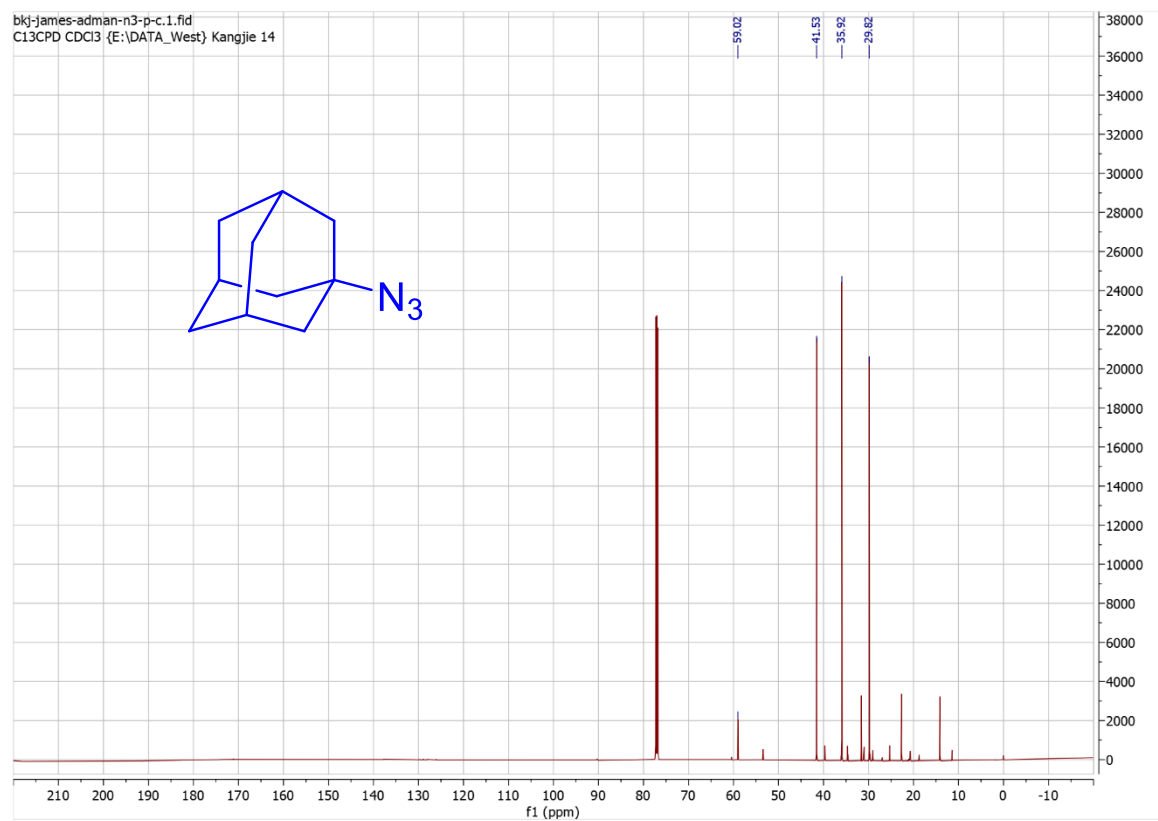

Crude  $^1\text{H}$ -NMR of azidocyclododecane

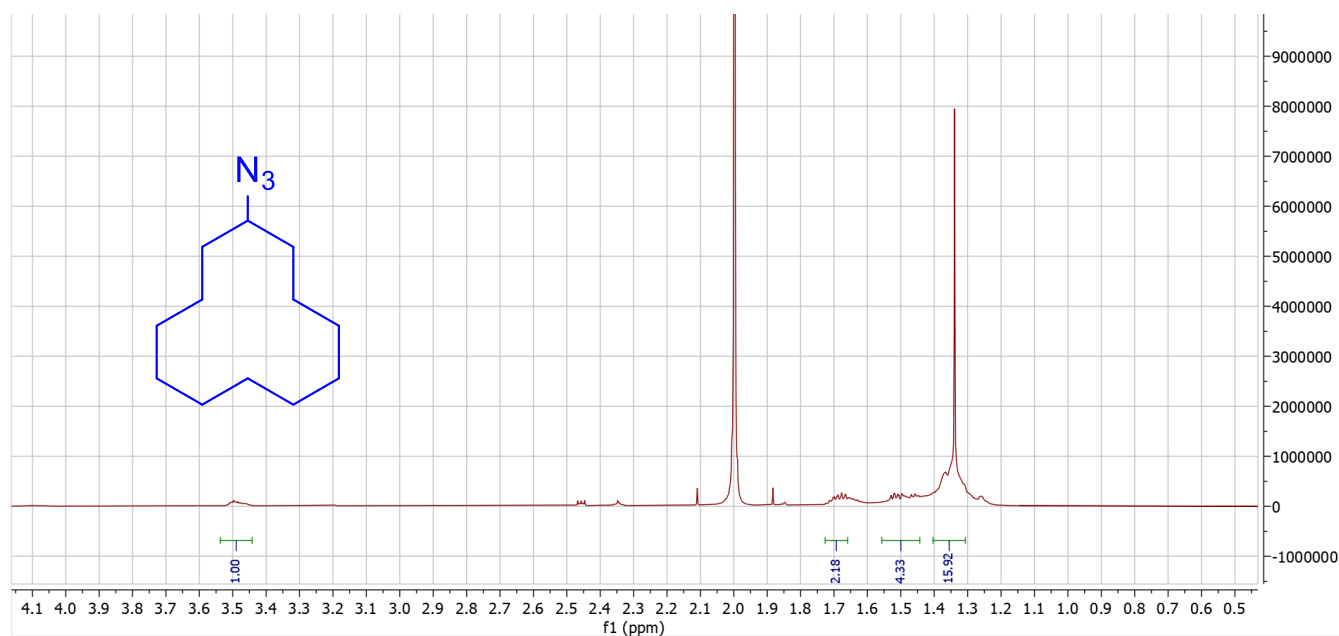

$^1\text{H}$ -NMR of (1*r*,3*s*,5*R*,7*S*)-1-azido-3-chloroadamantane

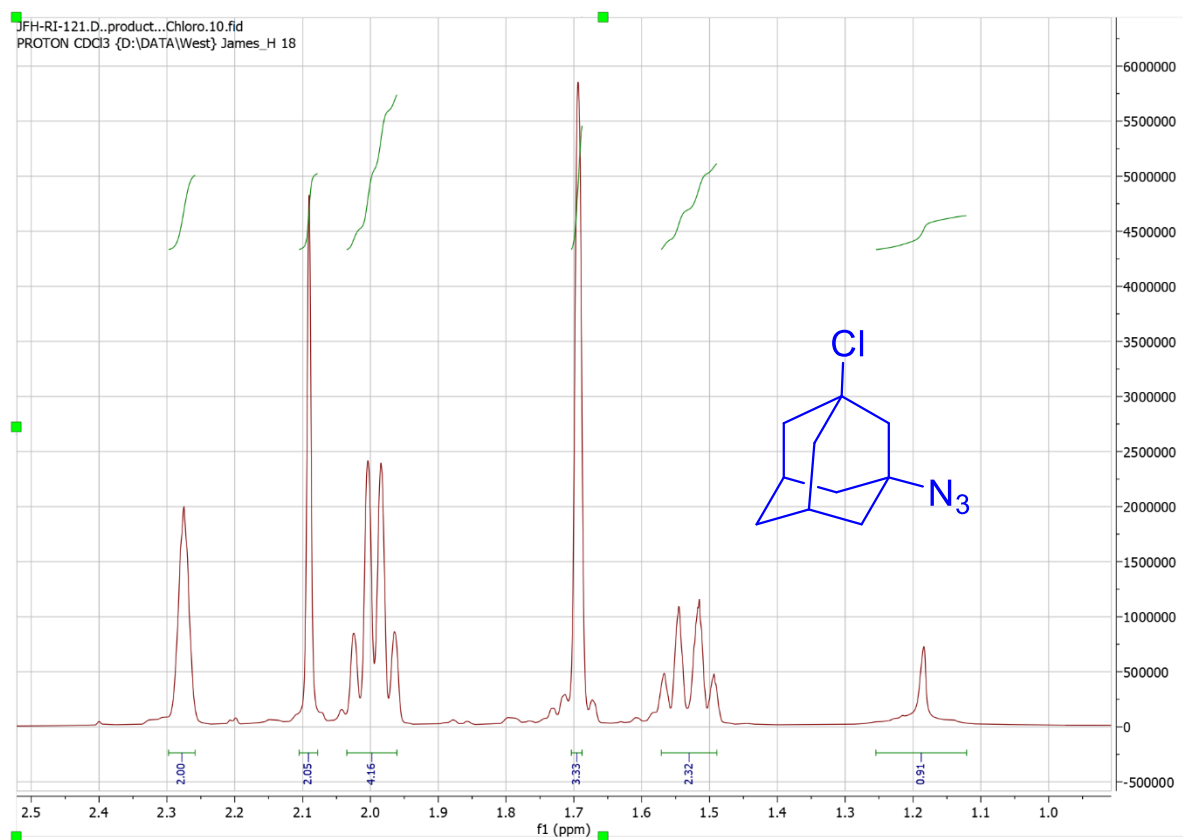



$^{13}\text{C}\{^1\text{H}\}$ -NMR of (1*r*,3*s*,5*R*,7*S*)-1-azido-3-chloroadamantane

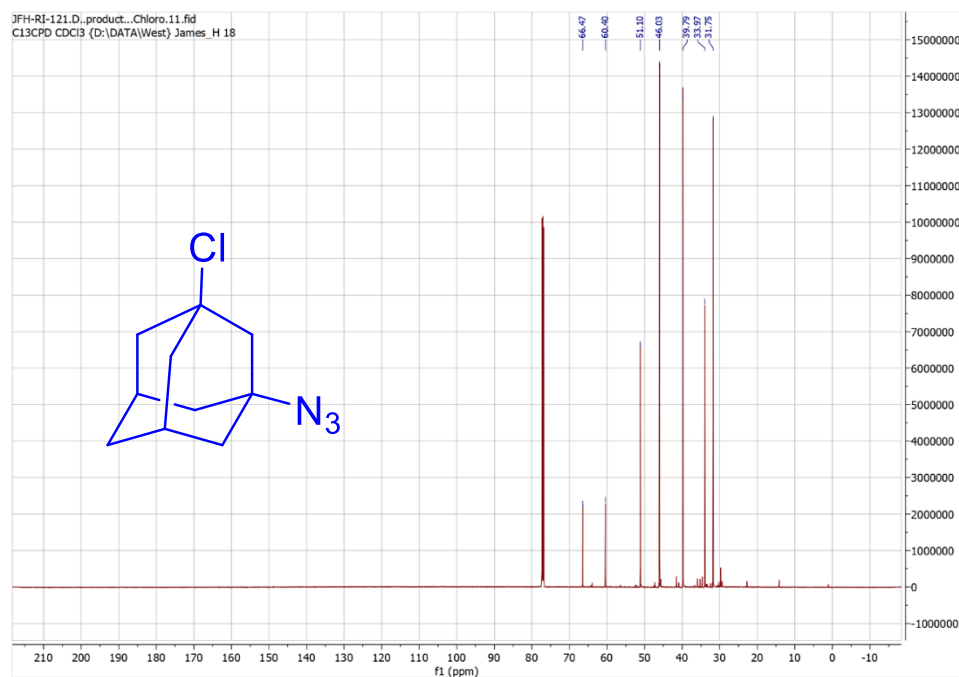

$^1\text{H}$ -NMR of (1*s*,3*r*,5*R*,7*S*)-3-azidoadamantan-1-ol, full spectrum

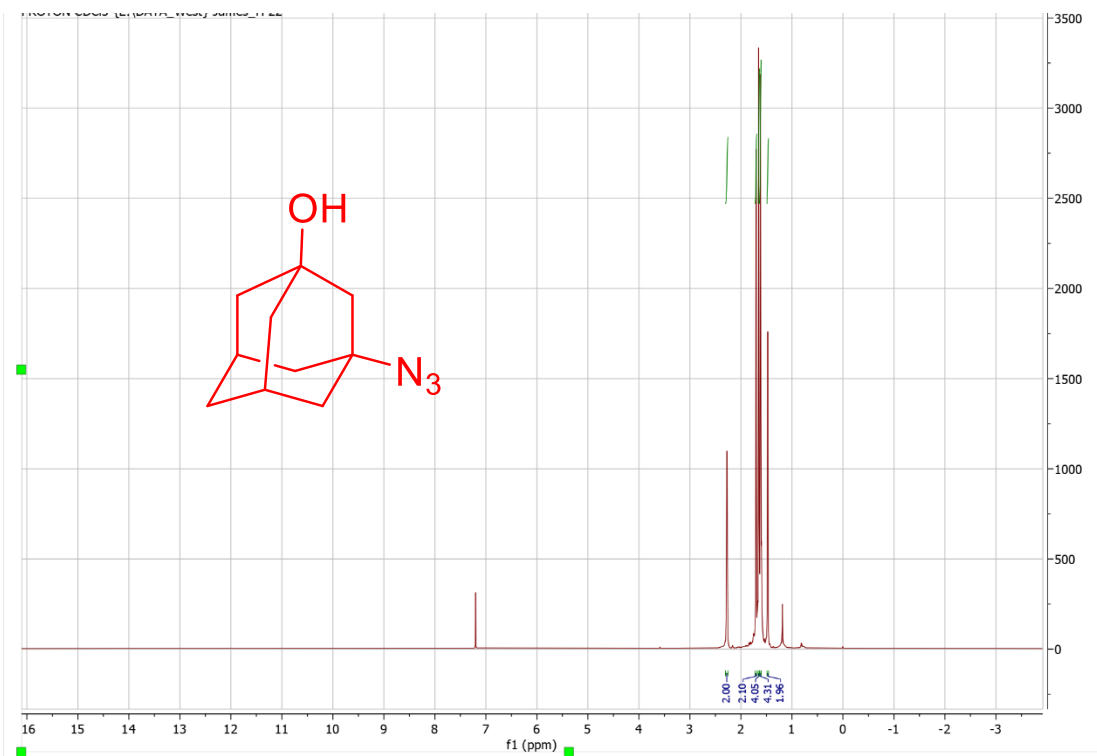

$^1\text{H}$ -NMR of (1*s*,3*r*,5*R*,7*S*)-3-azidoadamantan-1-ol, magnified spectrum

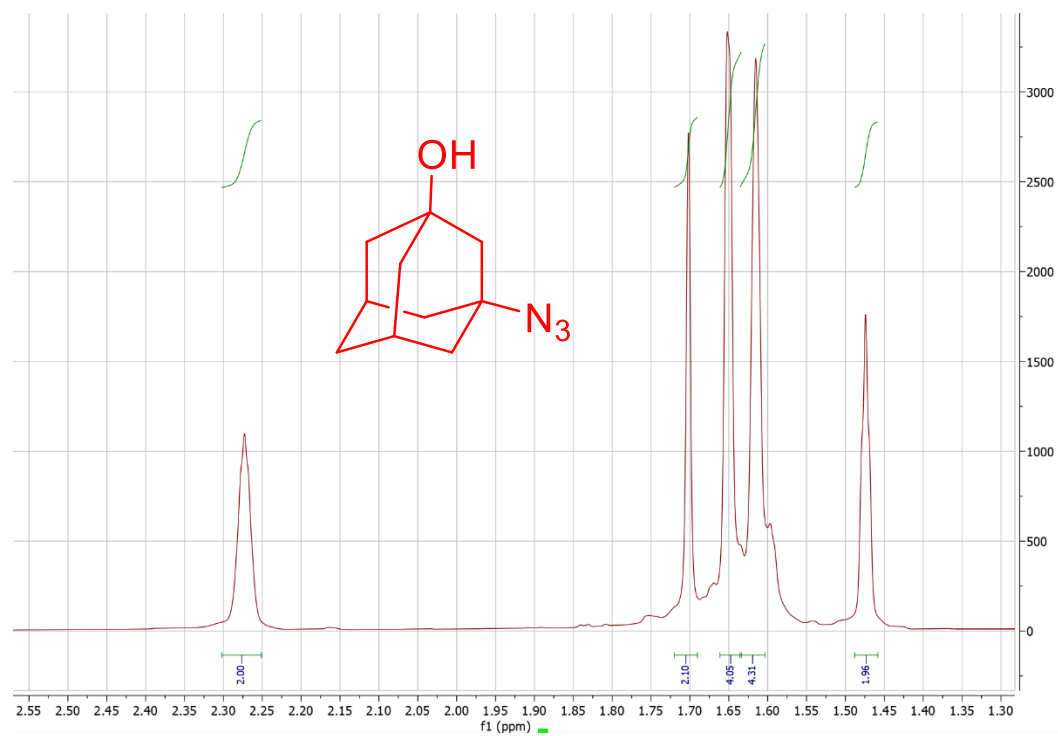

$^{13}\text{C}\{^1\text{H}\}$ -NMR of (1*s*,3*r*,5*R*,7*S*)-3-azidoadamantan-1-ol

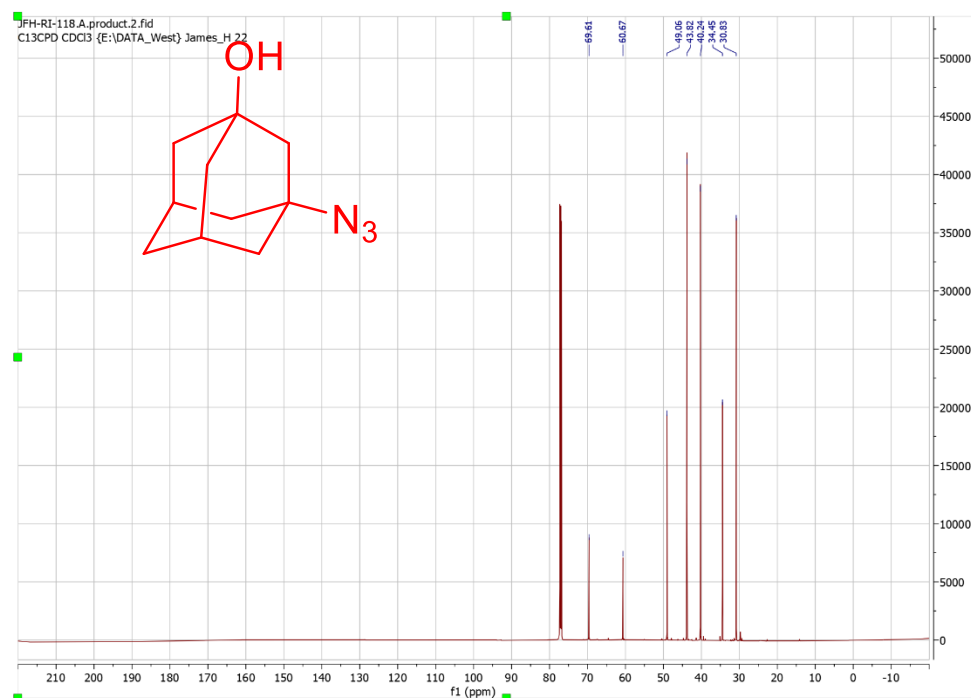

# $^1\text{H}$ -NMR of (3-azido-2-methylbutan-2-yl)benzene

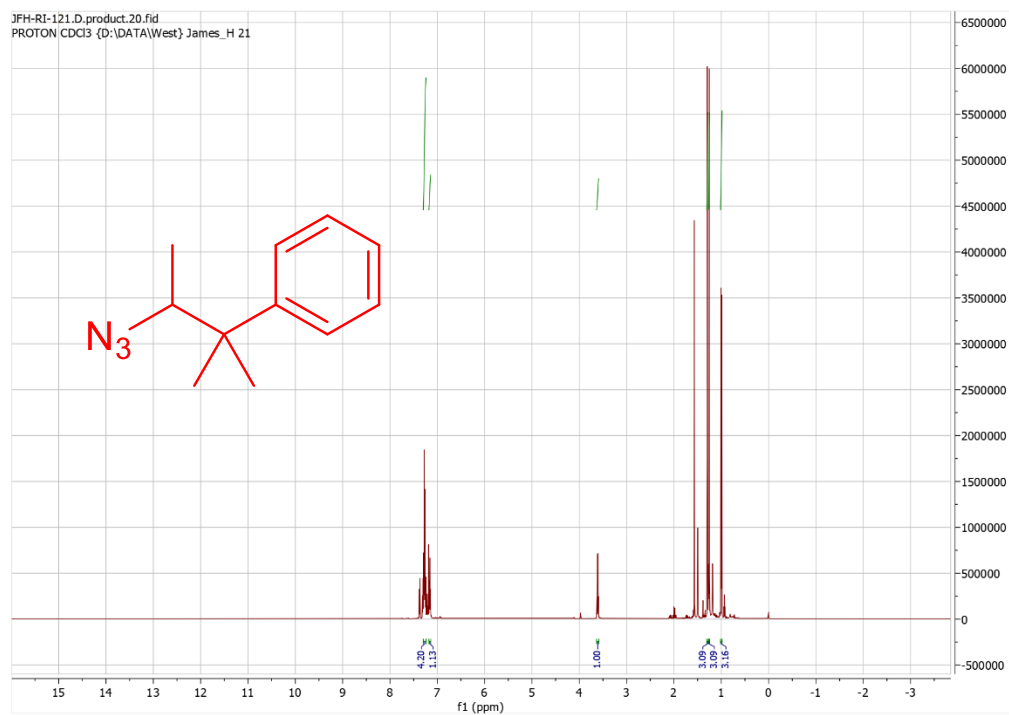

# $^{13}\text{C}\{^1\text{H}\}$ -NMR of (3-azido-2-methylbutan-2-yl)benzene

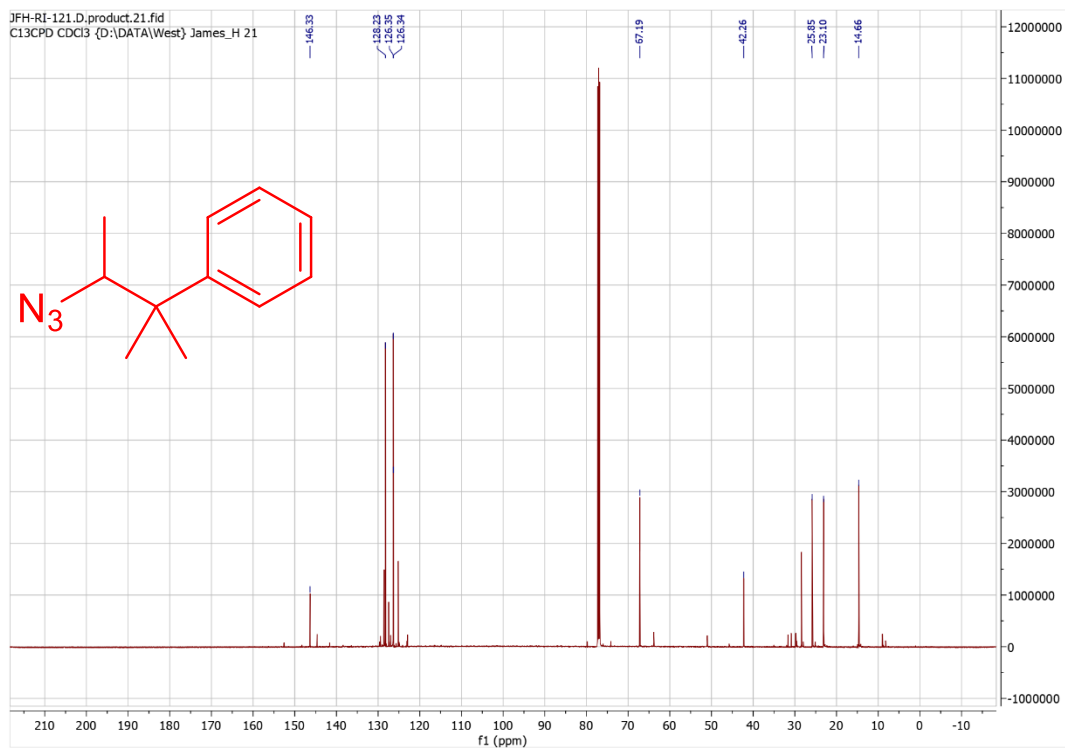

# $^1\text{H}$ -NMR of 4-azido-4-methyl-1-phenylpentan-1-one

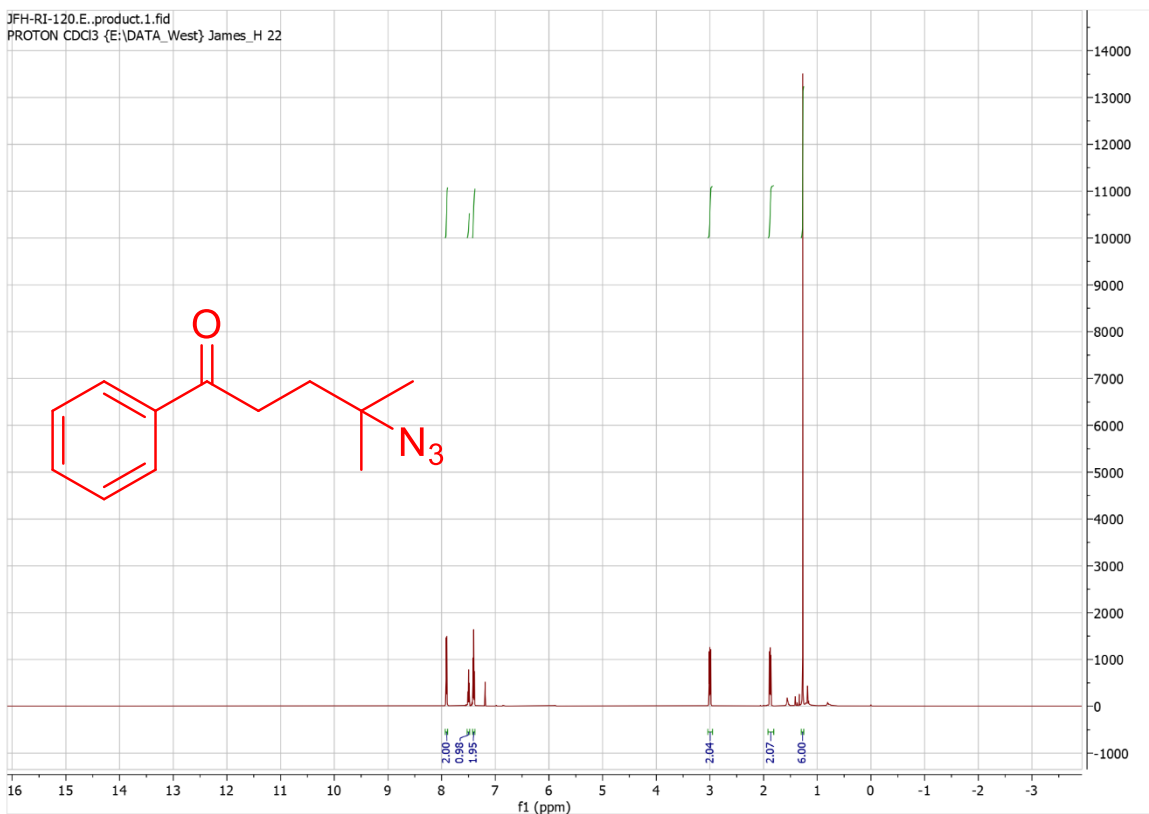

# $^{13}\text{C}\{^1\text{H}\}$ -NMR of 4-azido-4-methyl-1-phenylpentan-1-one

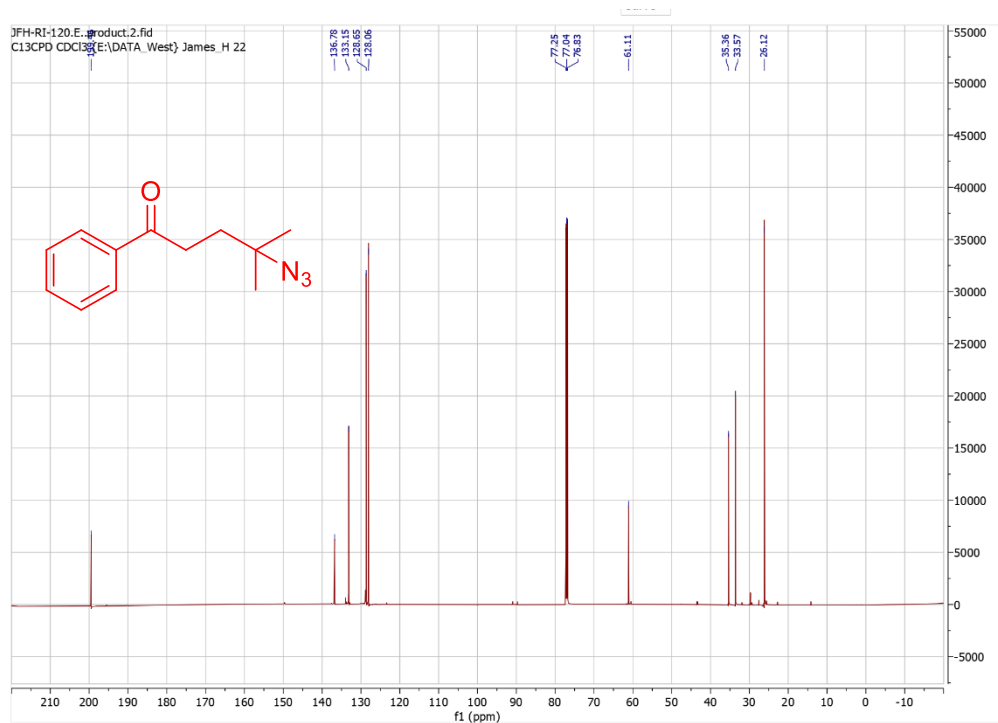

# <sup>1</sup>H-NMR of azidocyclopentadecane, full spectrum

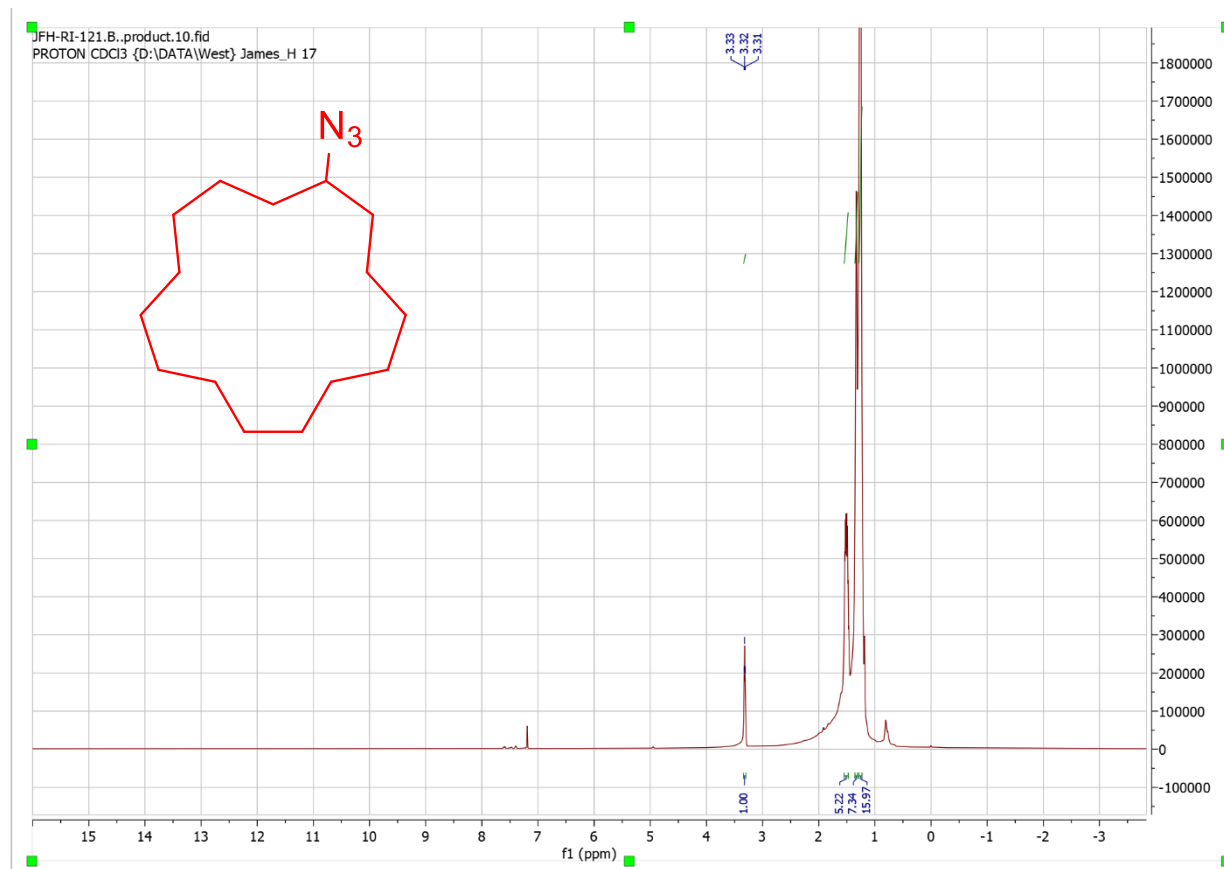

## <sup>1</sup>H-NMR of azidocyclopentadecane, magnified spectrum 0.2ppm to 2.3 ppm

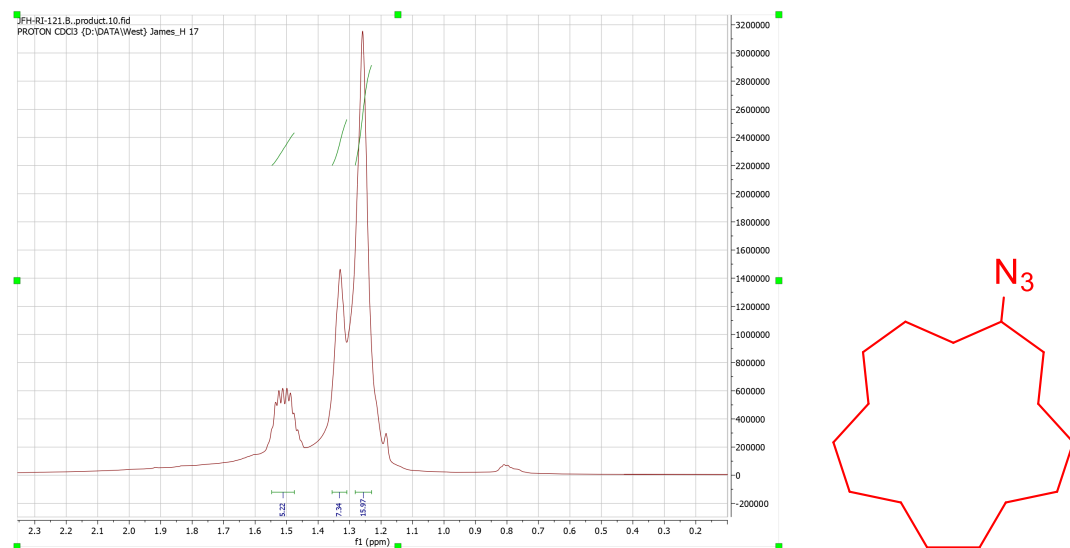

$^1\text{H}$ -NMR of azidocyclopentadecane, magnified spectrum 3.26ppm to 3.33 ppm

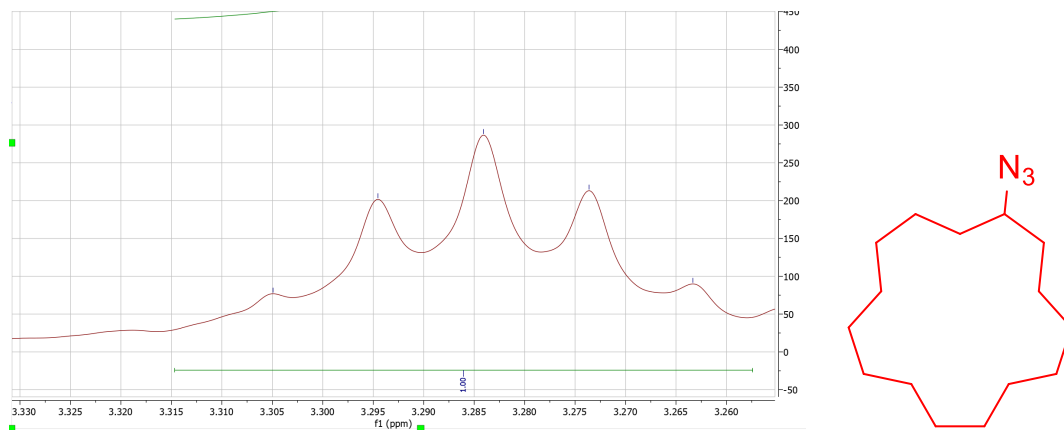

$^{13}\text{C}\{^1\text{H}\}$ -NMR of azidocyclopentadecane

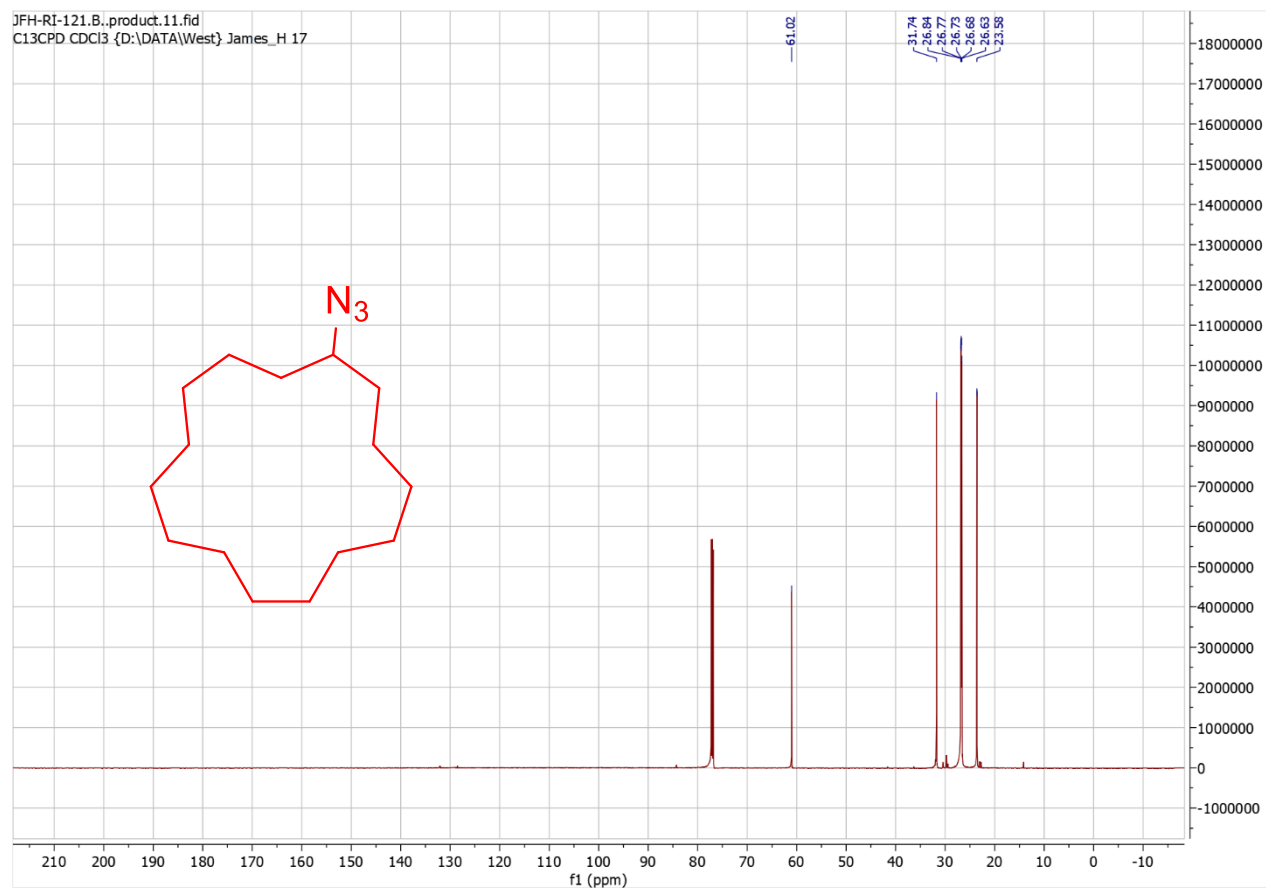

$^1\text{H}$ -NMR of *N*-((1*r*,3*s*,5*R*,7*S*)-3-azidoadamantan-1-yl)acetamide, full spectrum

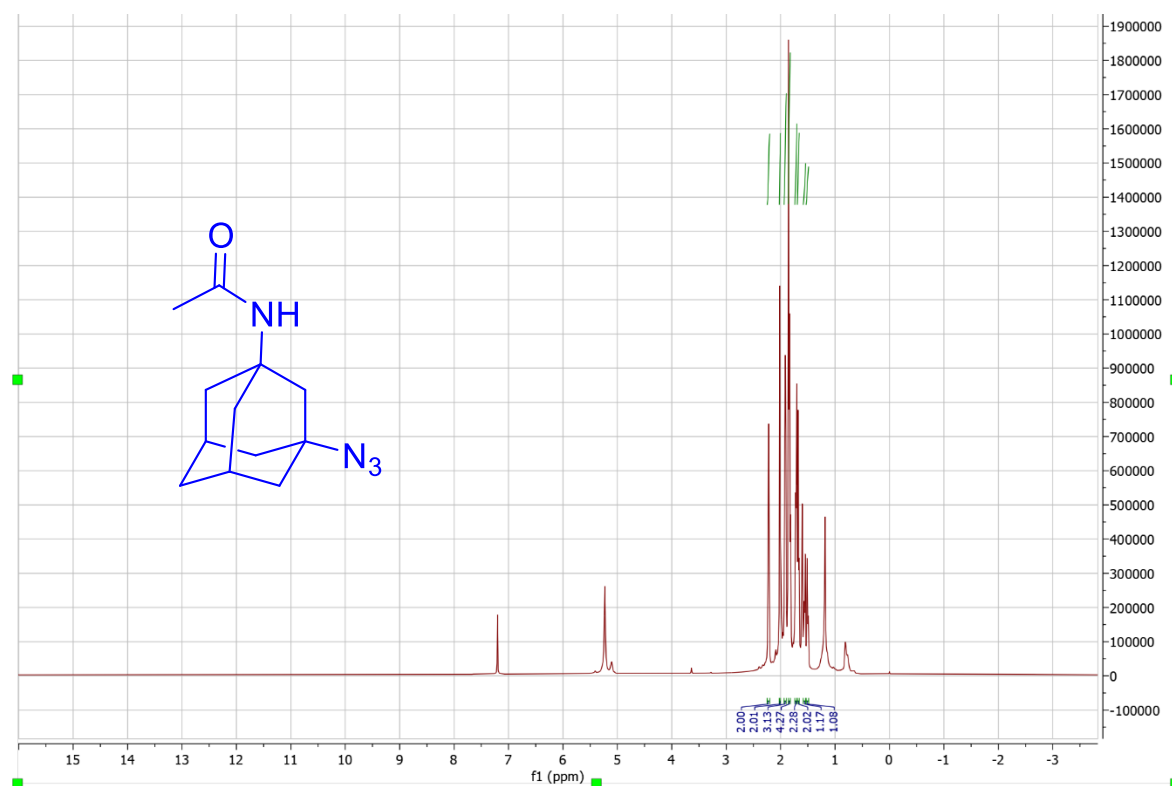

$^1\text{H}$ -NMR of *N*-((1*r*,3*s*,5*R*,7*S*)-3-azidoadamantan-1-yl)acetamide, magnified spectrum

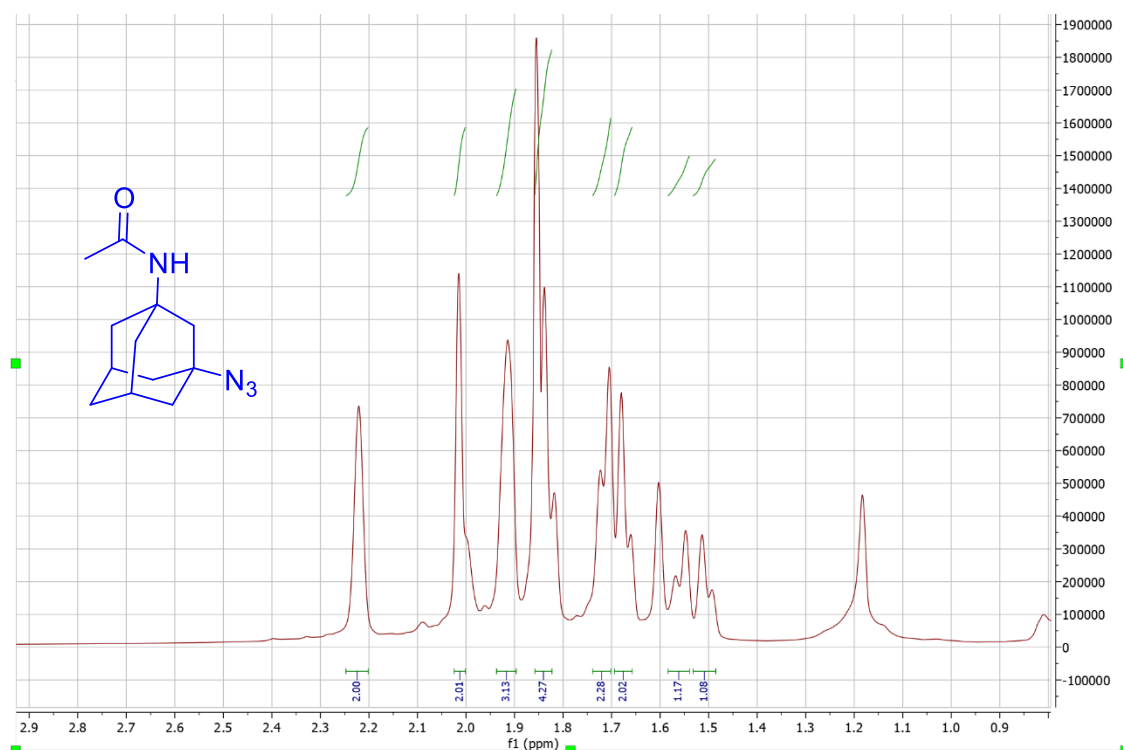

$^{13}\text{C}\{^1\text{H}\}$ -NMR of *N*-((1*r*,3*s*,5*R*,7*S*)-3-azidoadamantan-1-yl)acetamide

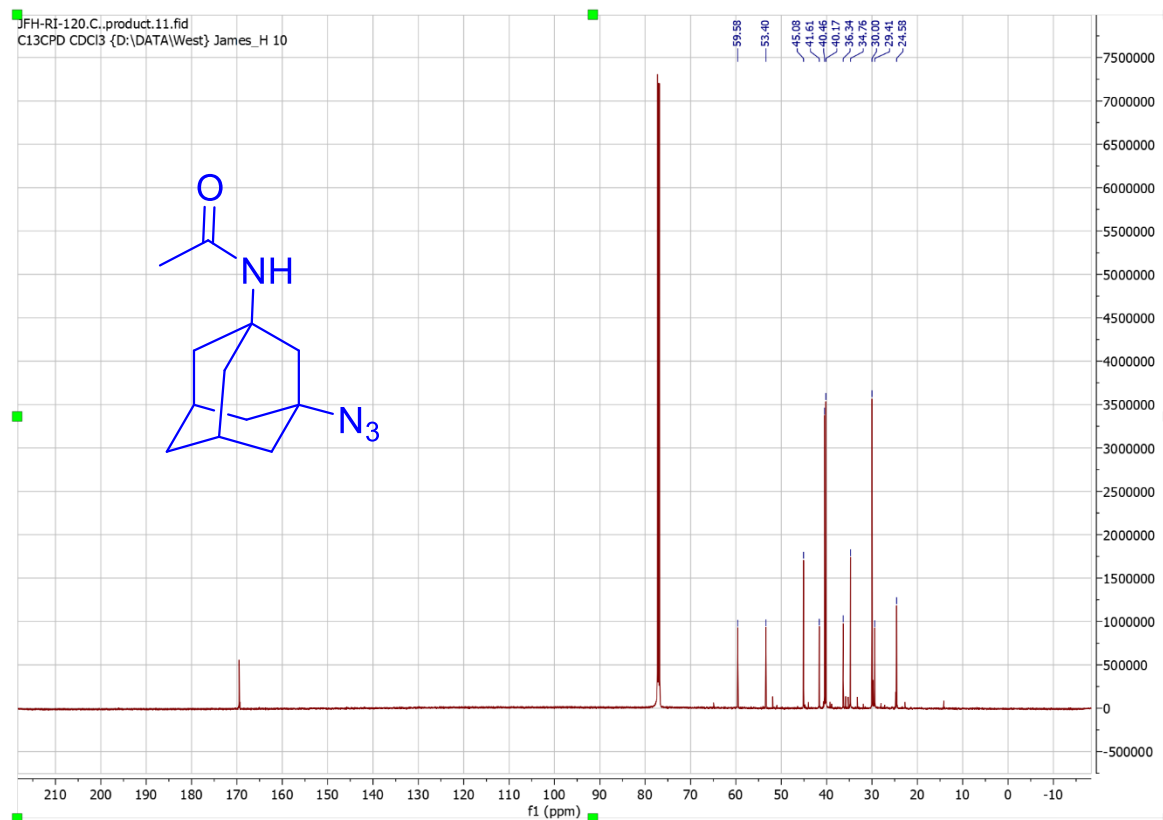

$^1\text{H}$ -NMR of 5-azido-5-methylhexan-2-yl benzoate, full spectrum

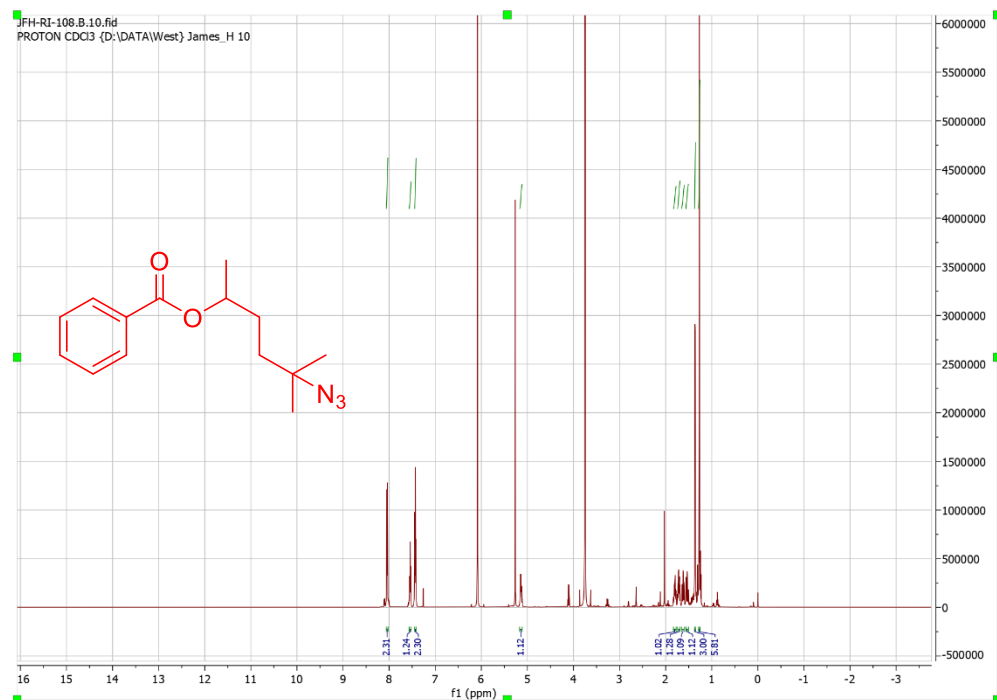



# <sup>1</sup>H-NMR of 5-azido-5-methylhexan-2-yl benzoate, magnified spectrum

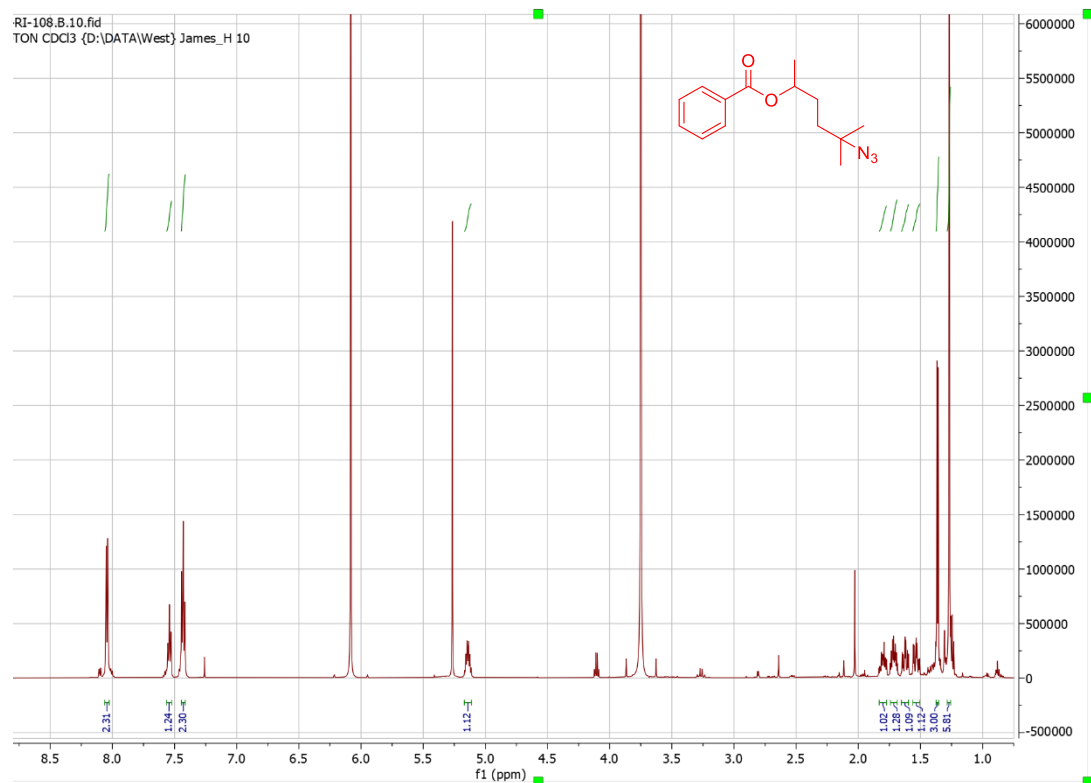

## Crude <sup>1</sup>H-NMR of 4-azido-4-methylpentanoic acid

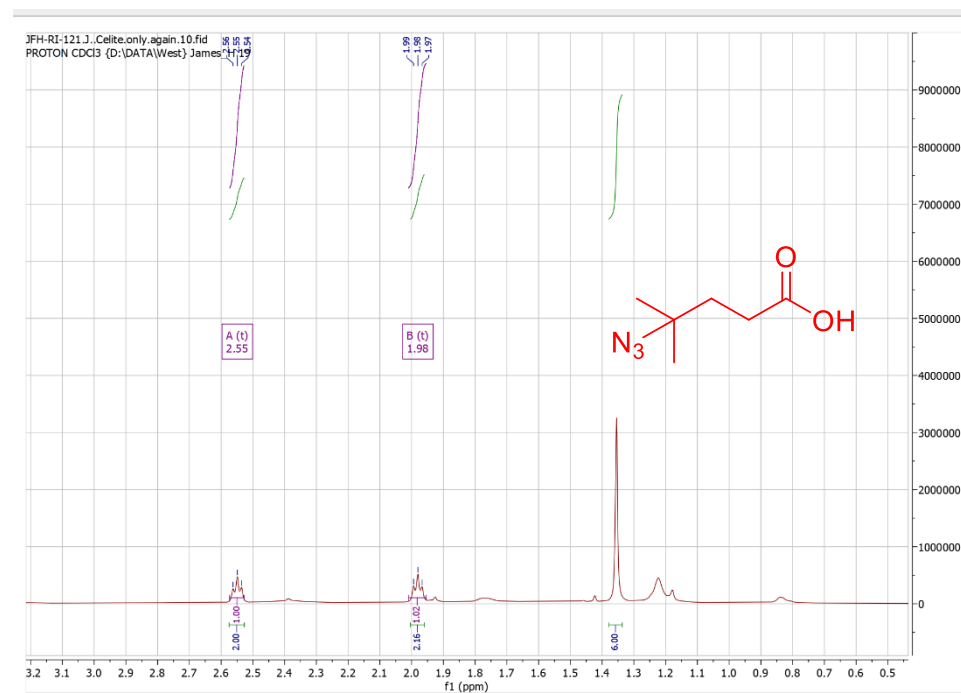

<sup>1</sup>H-NMR of 4-azido-2,2,6,6-tetramethylcyclohexan-1-one and 3-azido-2,2,6,6-tetramethylcyclohexanone, full spectrum

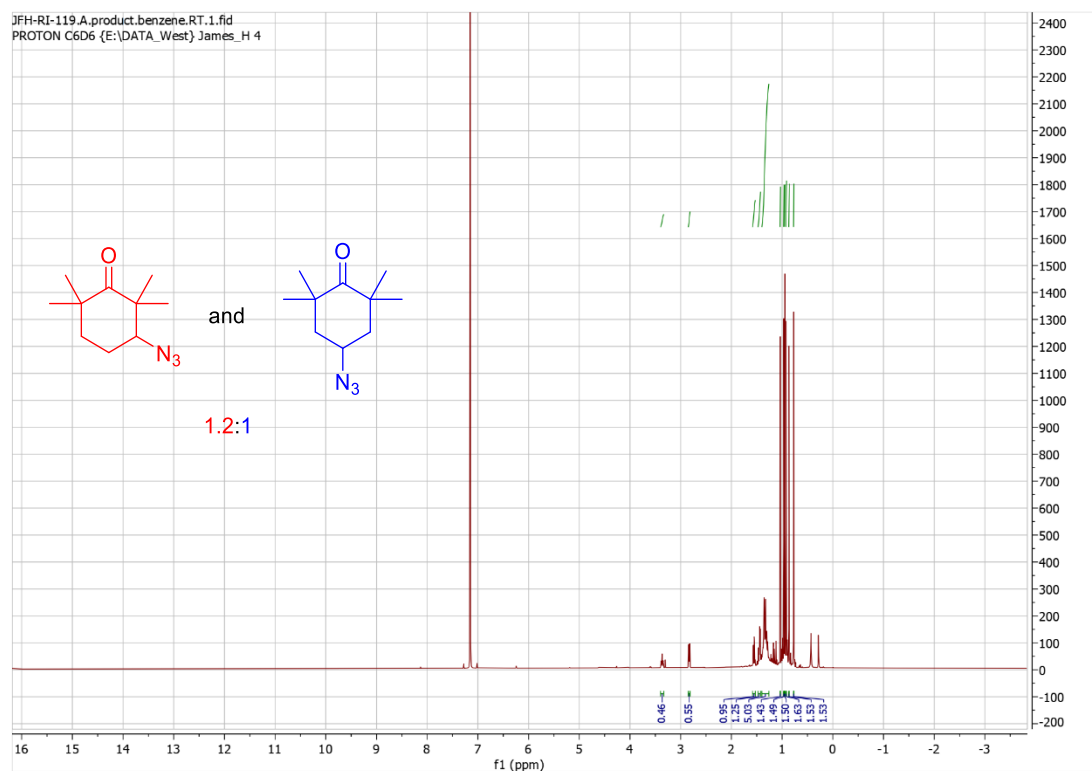

<sup>1</sup>H-NMR of 4-azido-2,2,6,6-tetramethylcyclohexan-1-one and 3-azido-2,2,6,6-tetramethylcyclohexanone, magnified spectrum

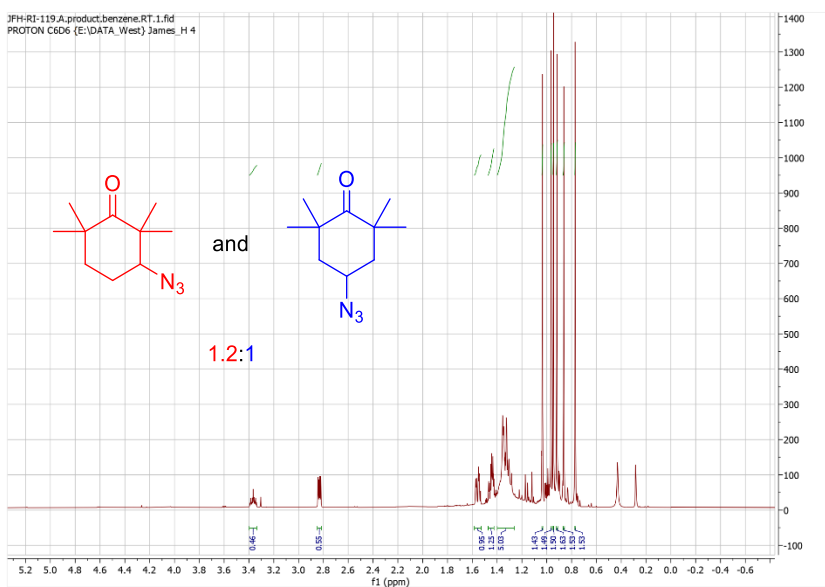

$^{13}\text{C}\{^1\text{H}\}$ -NMR of 4-azido-2,2,6,6-tetramethylcyclohexan-1-one and 3-azido-2,2,6,6-tetramethylcyclohexanone

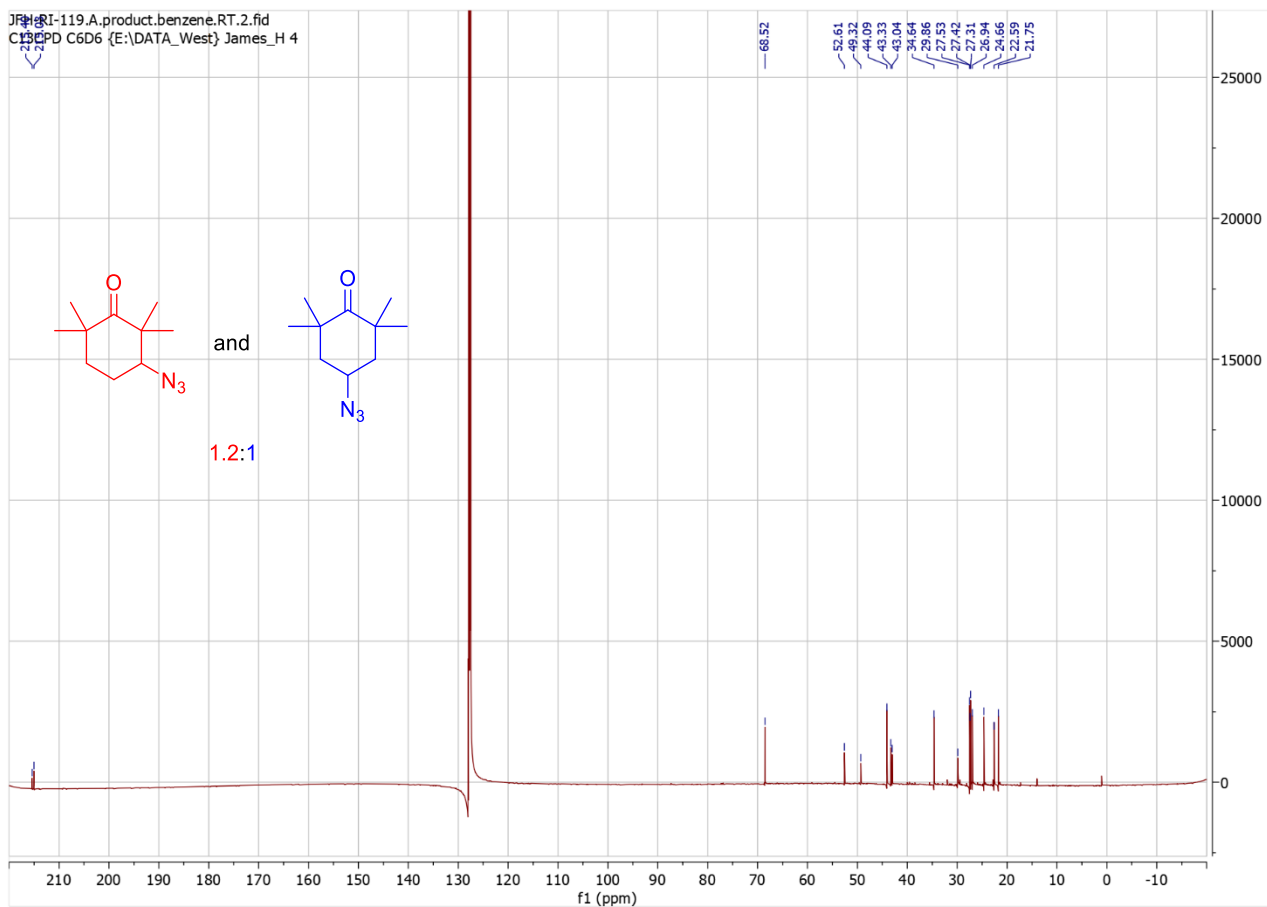

# <sup>1</sup>H-NMR of 2-azidooxepane, full spectrum

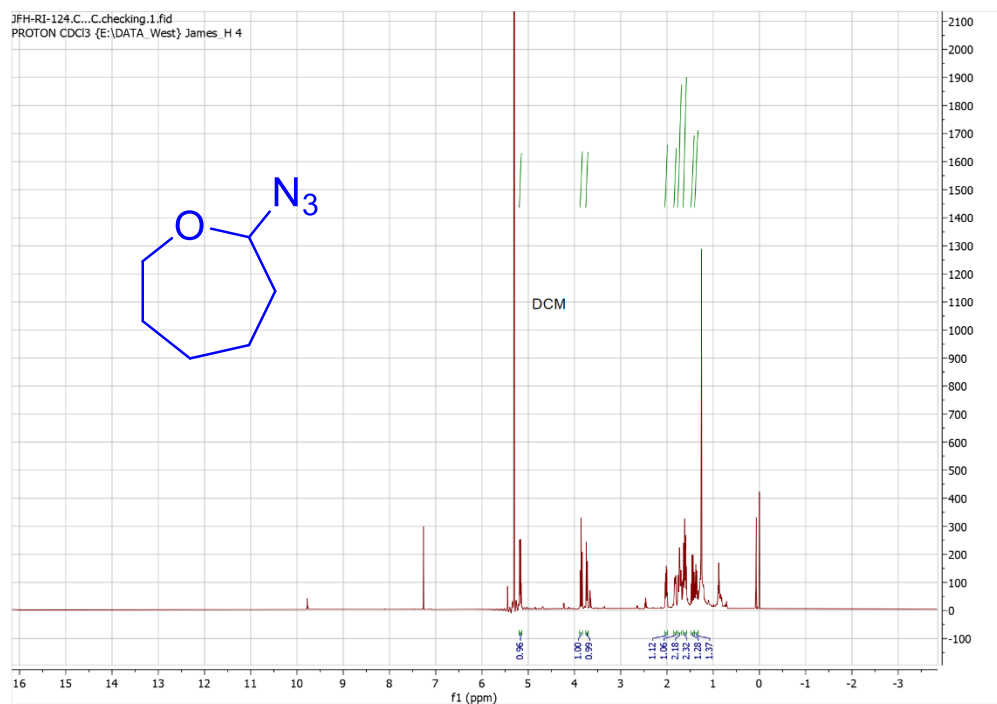

# <sup>1</sup>H-NMR of 2-azidooxepane, magnified spectrum

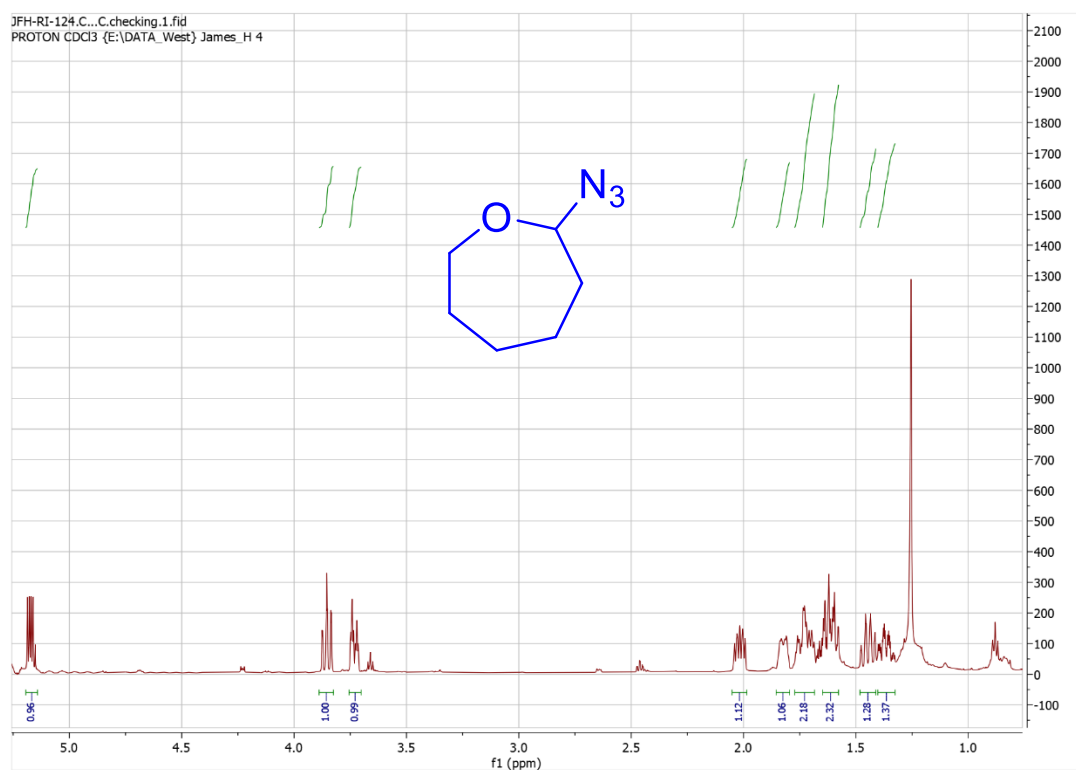

$^{13}\text{C}\{^1\text{H}\}$ -NMR of 2-azidooxepane

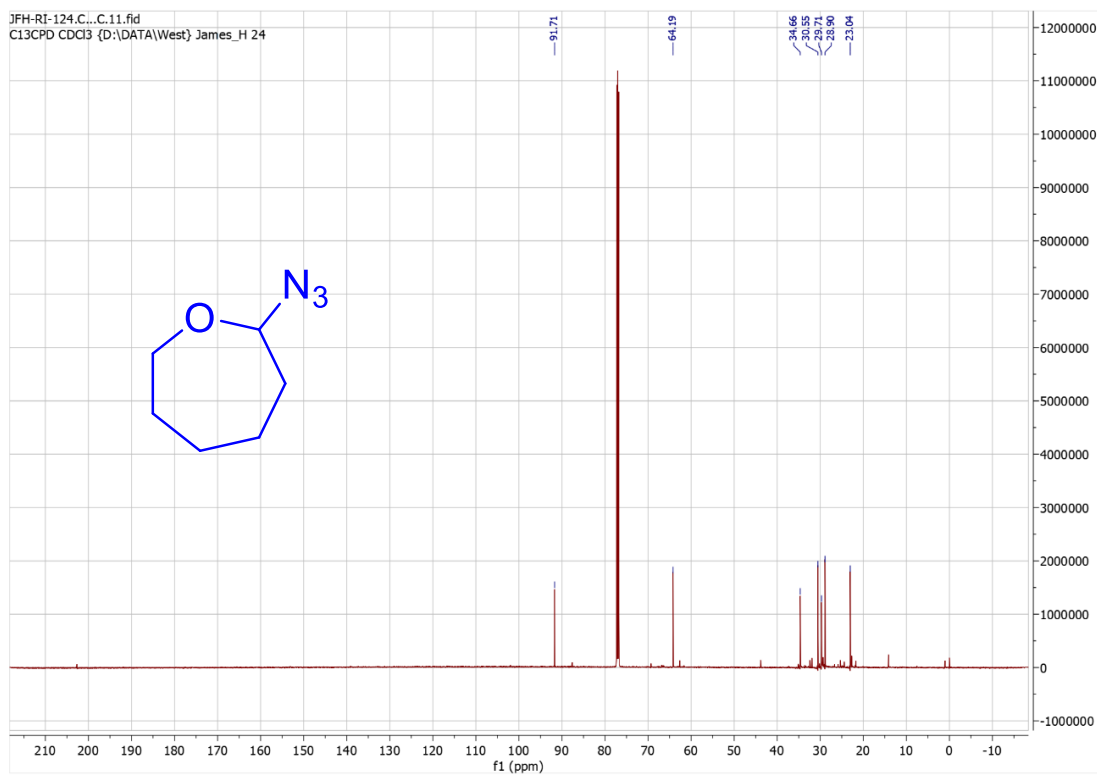

# Crude <sup>1</sup>H-NMR of *tert*-butyl 2-azidopyrrolidine-1-carboxylate

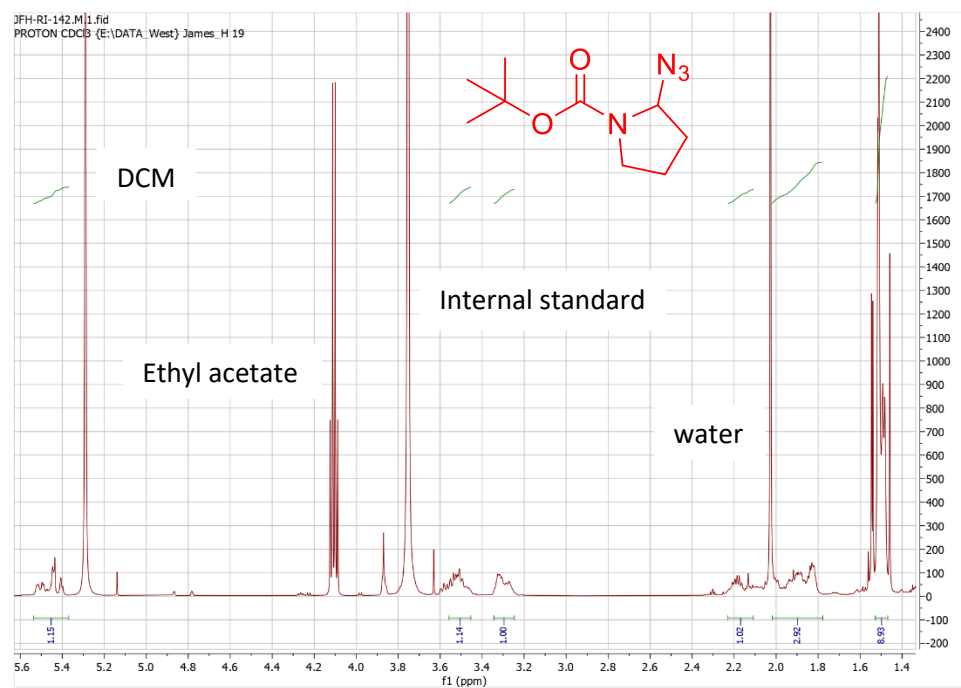

# <sup>1</sup>H-NMR of 1-azidoethylbenzene

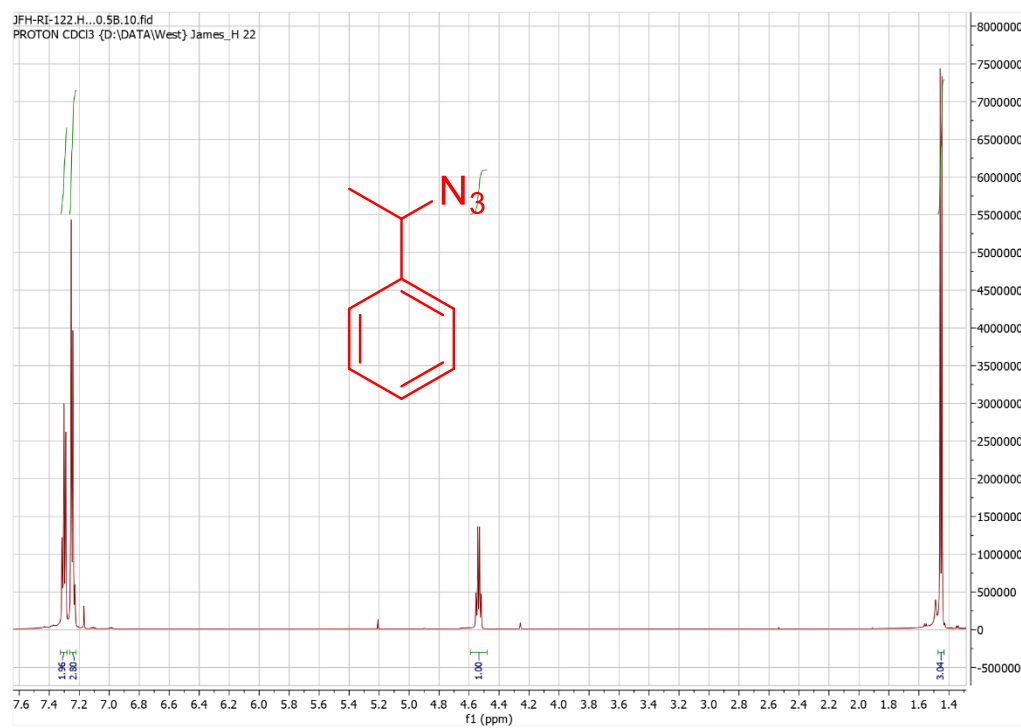

$^{13}\text{C}\{^1\text{H}\}$ -NMR of 1-azidoethylbenzene

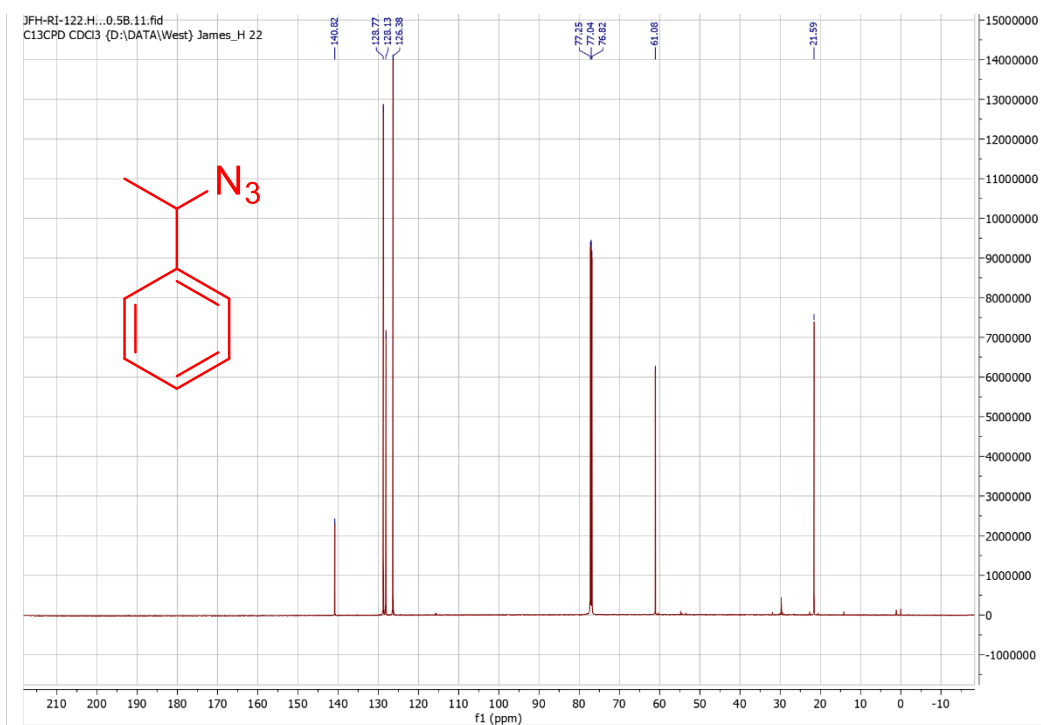

Crude  $^1\text{H}$ -NMR of benzylic-azido-celestolide

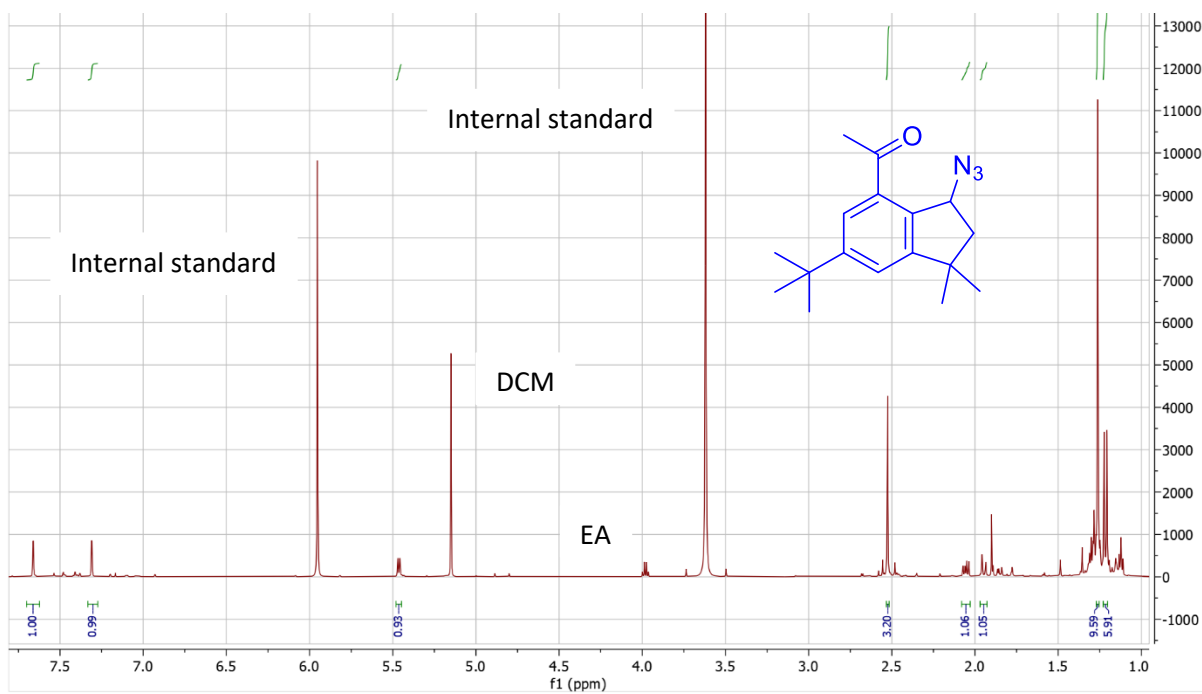

# <sup>1</sup>H-NMR of 2-azidocycloheptan-1-one, full spectrum

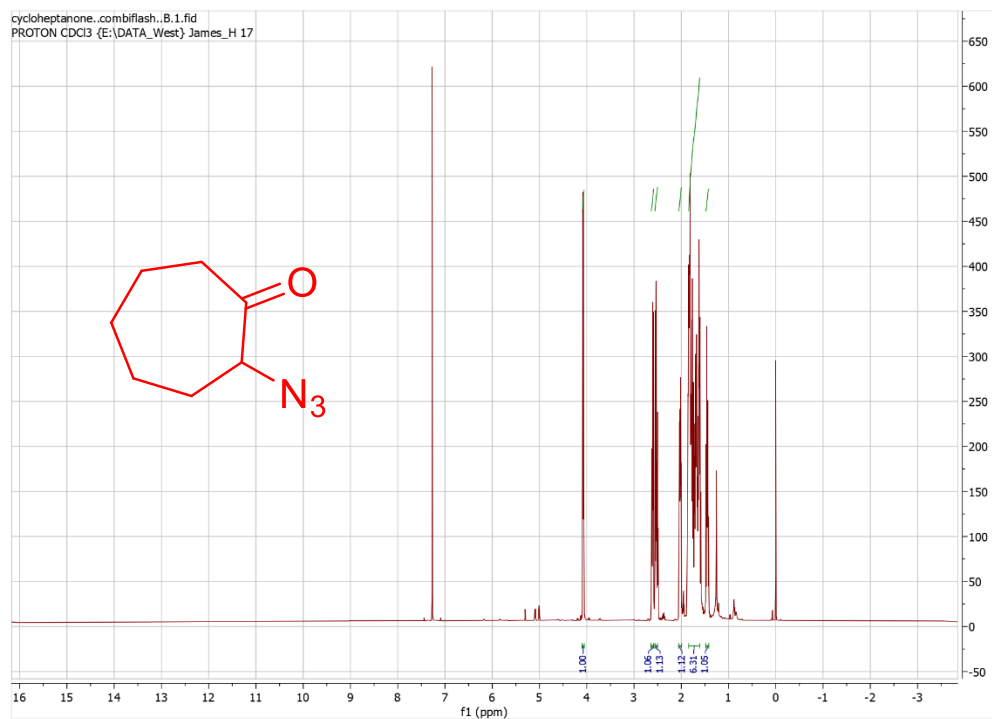

# <sup>1</sup>H-NMR of 2-azidocycloheptan-1-one, magnified spectrum

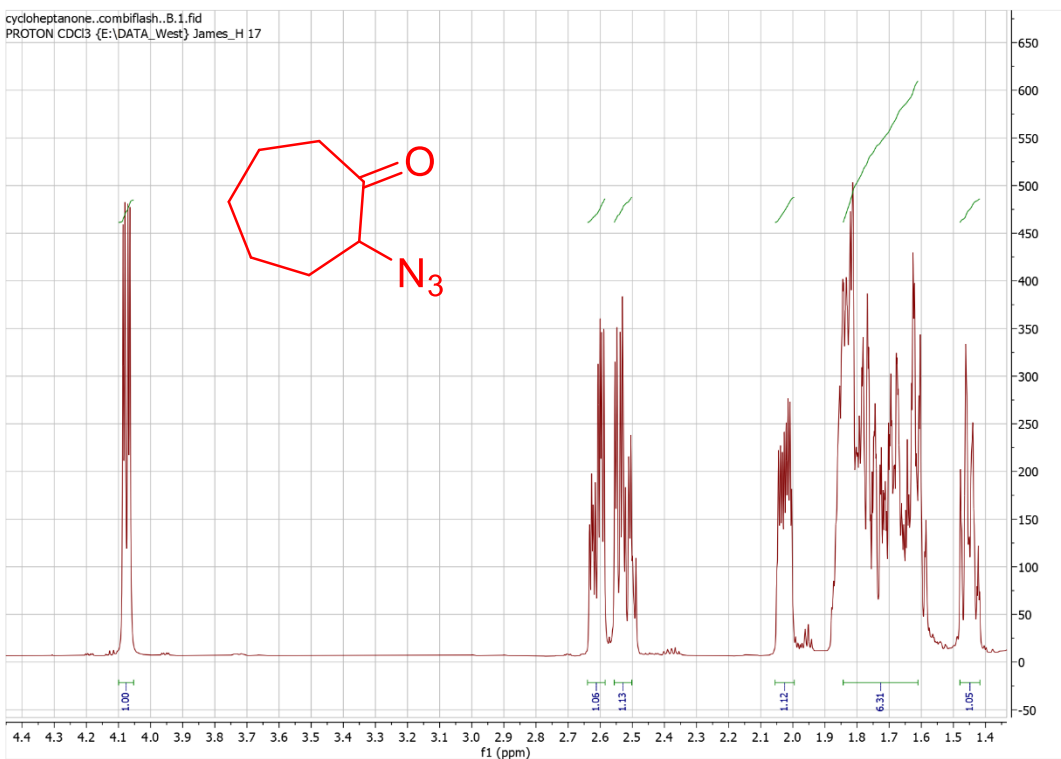



cycloheptanone..combiflash..B.2.fid  
C13CPDopt CDC13 (E1DATA .West) James\_H 17

Chemical structure: O=C1CCCCC1[N+]=[N-]

Peak list (ppm):

| Peak (ppm) |
|------------|
| 210.80     |
| 67.80      |
| 41.41      |
| 30.82      |
| 28.82      |
| 26.56      |
| 23.59      |

isopropylcyclohexane..B.1.fid  
PROTON CDCl3 {E:\DATA\_West\} James\_H\_24

Chemical structure of isopropylcyclohexane is shown in the top left corner.

<sup>1</sup>H-NMR of 1-azido-1-isopropylcyclohexane and (2-azidopropan-2-yl)cyclohexane, magnified spectrum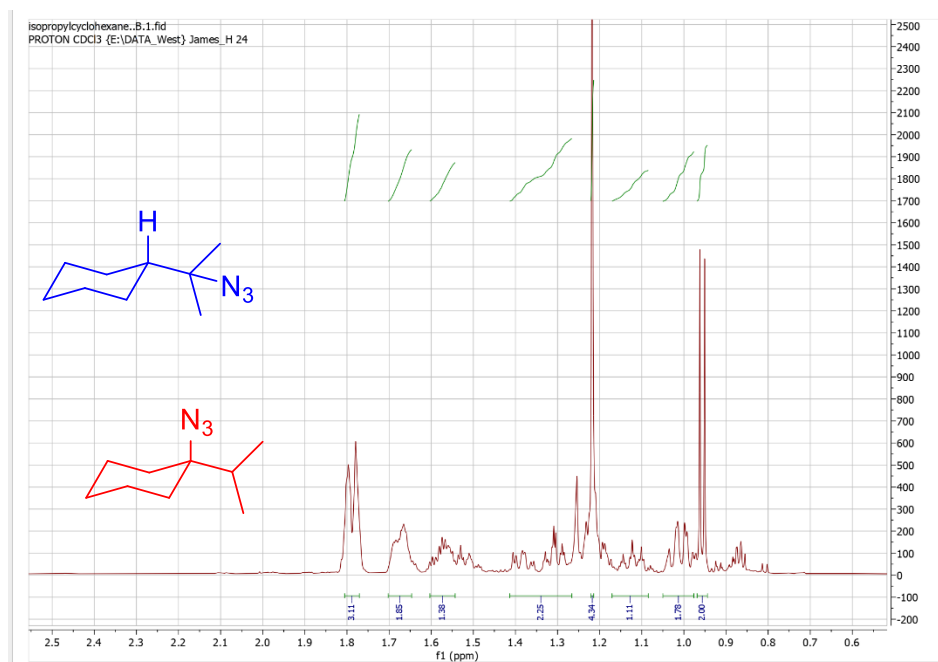 $^{13}\text{C}\{^1\text{H}\}$ -NMR of 1-azido-1-isopropylcyclohexane and (2-azidopropan-2-yl)cyclohexane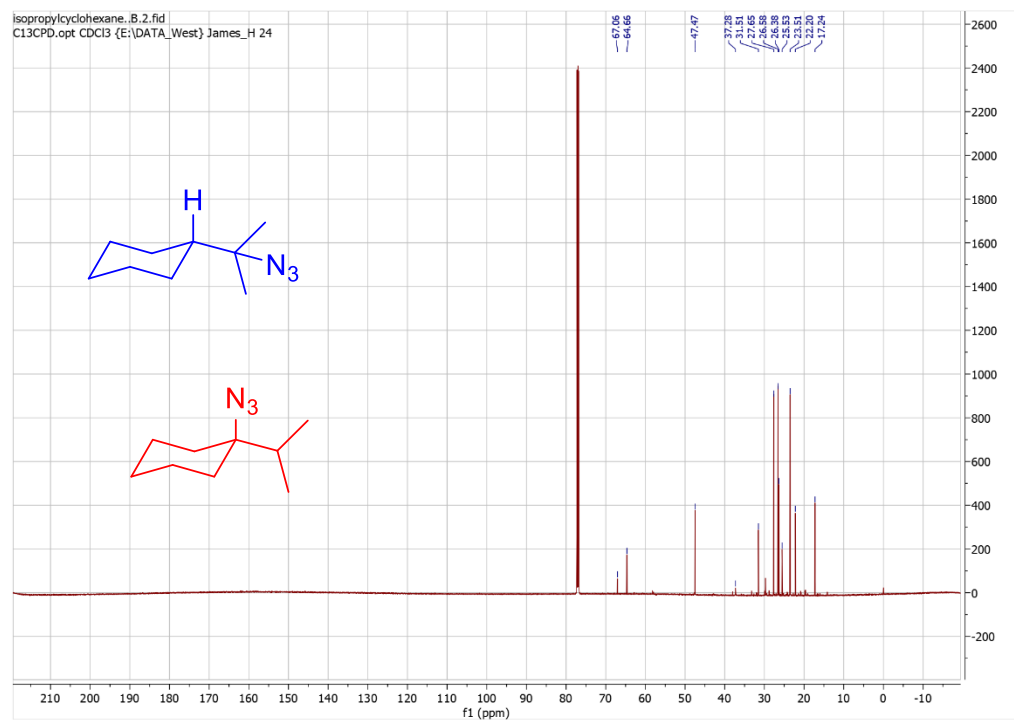

### $^1\text{H}$ -NMR of (1-azido-2,2-dimethylpropyl)benzene

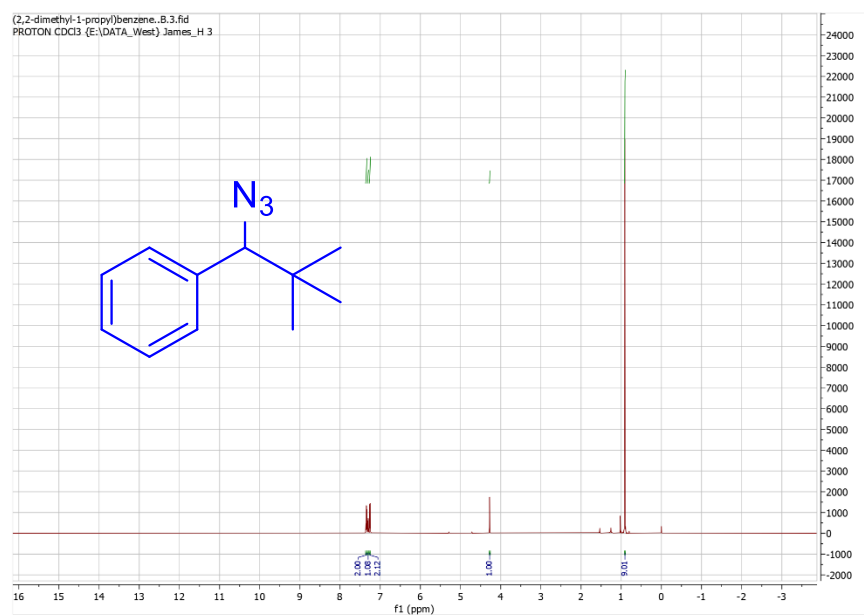

### $^{13}\text{C}\{^1\text{H}\}$ -NMR of (1-azido-2,2-dimethylpropyl)benzene

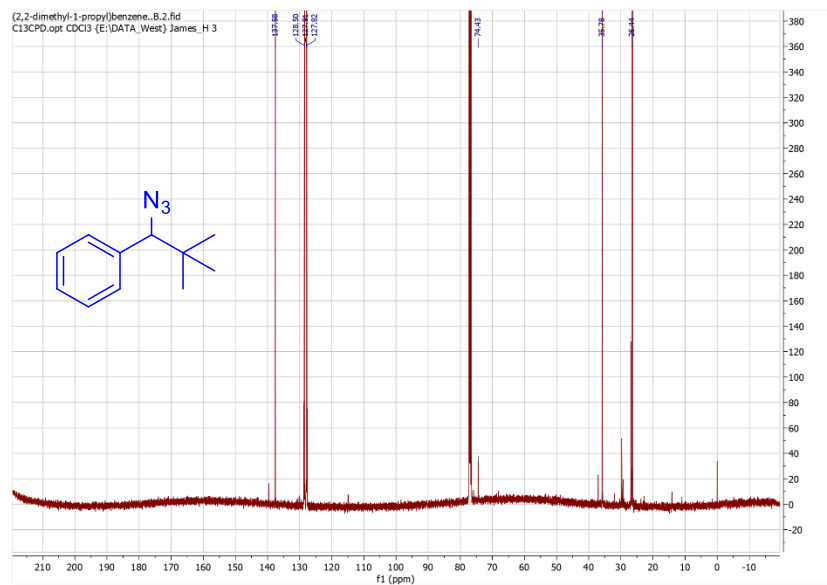

<sup>1</sup>H-NMR of 1-((1*r*,3*s*,5*R*,7*S*)-3-chloroadamantan-1-yl)-4-phenyl-1*H*-1,2,3-triazole

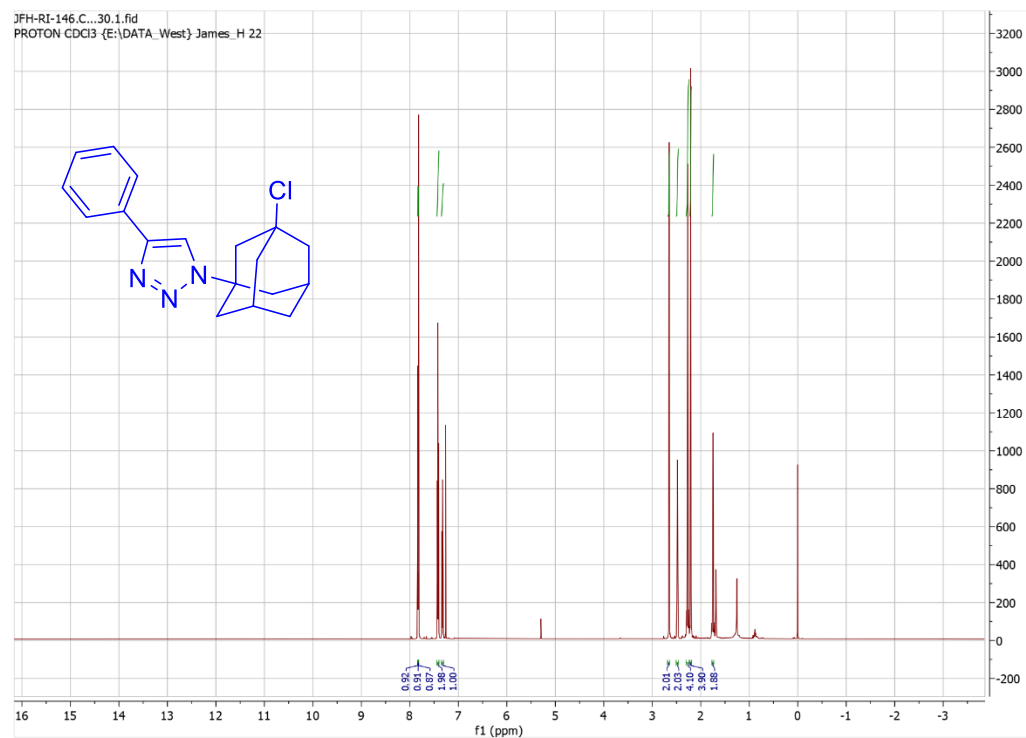

<sup>13</sup>C{<sup>1</sup>H}-NMR of 1-((1*r*,3*s*,5*R*,7*S*)-3-chloroadamantan-1-yl)-4-phenyl-1*H*-1,2,3-triazole

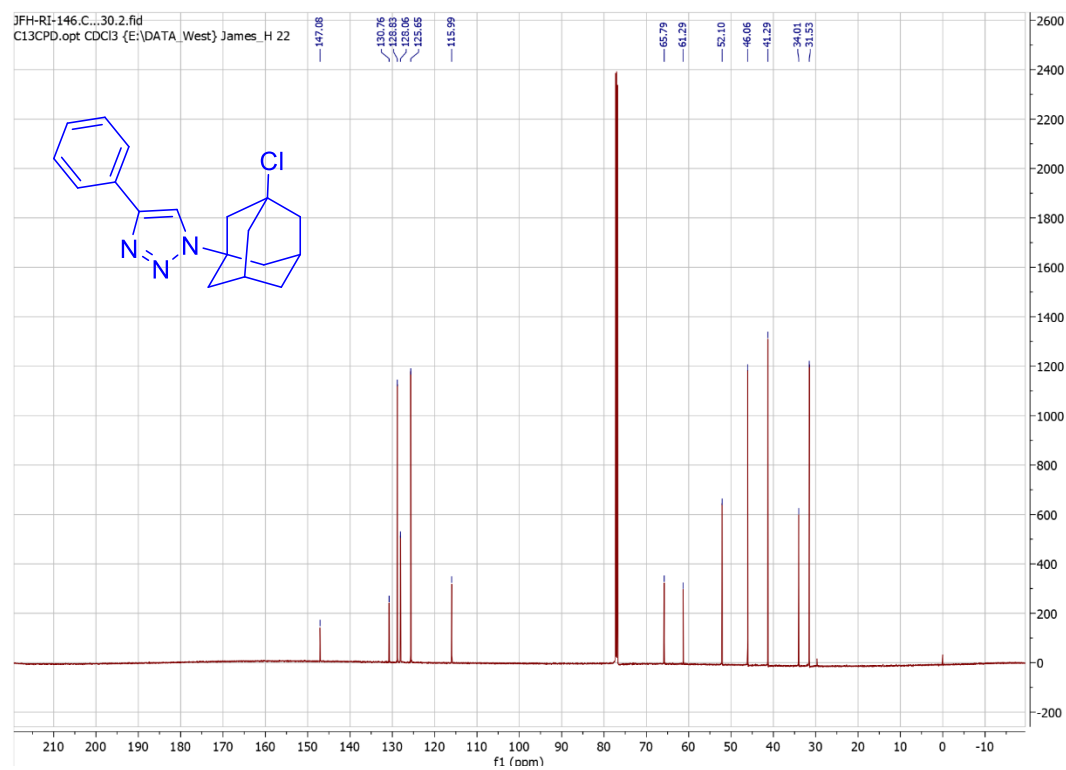

# Additional Isolated Product Spectra

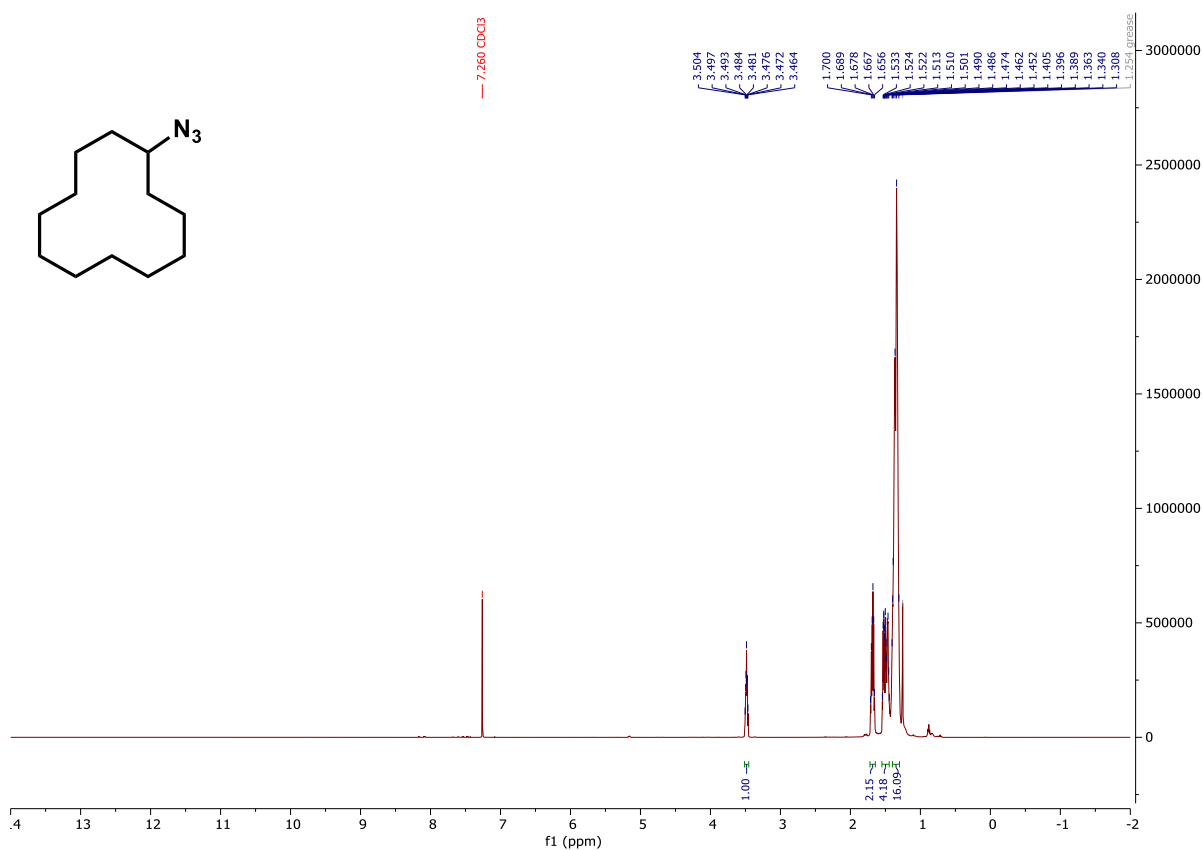

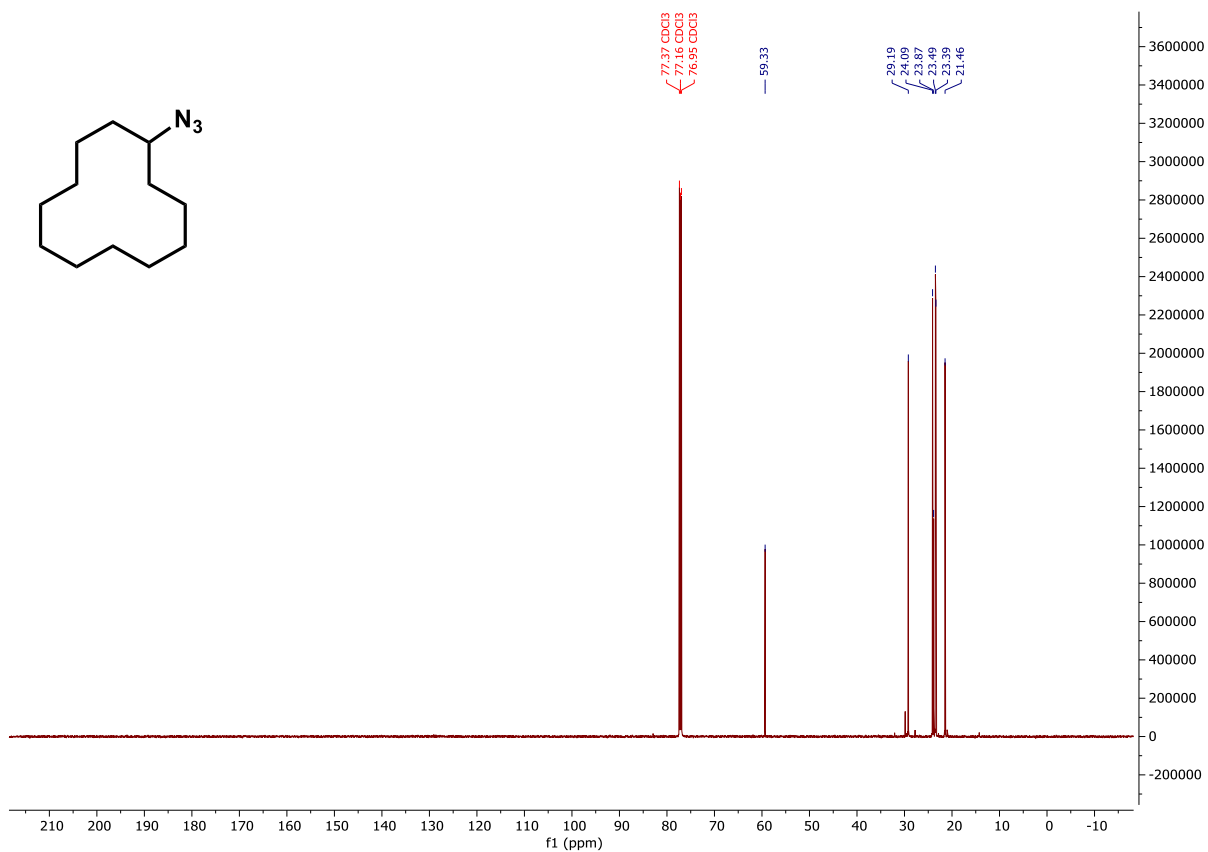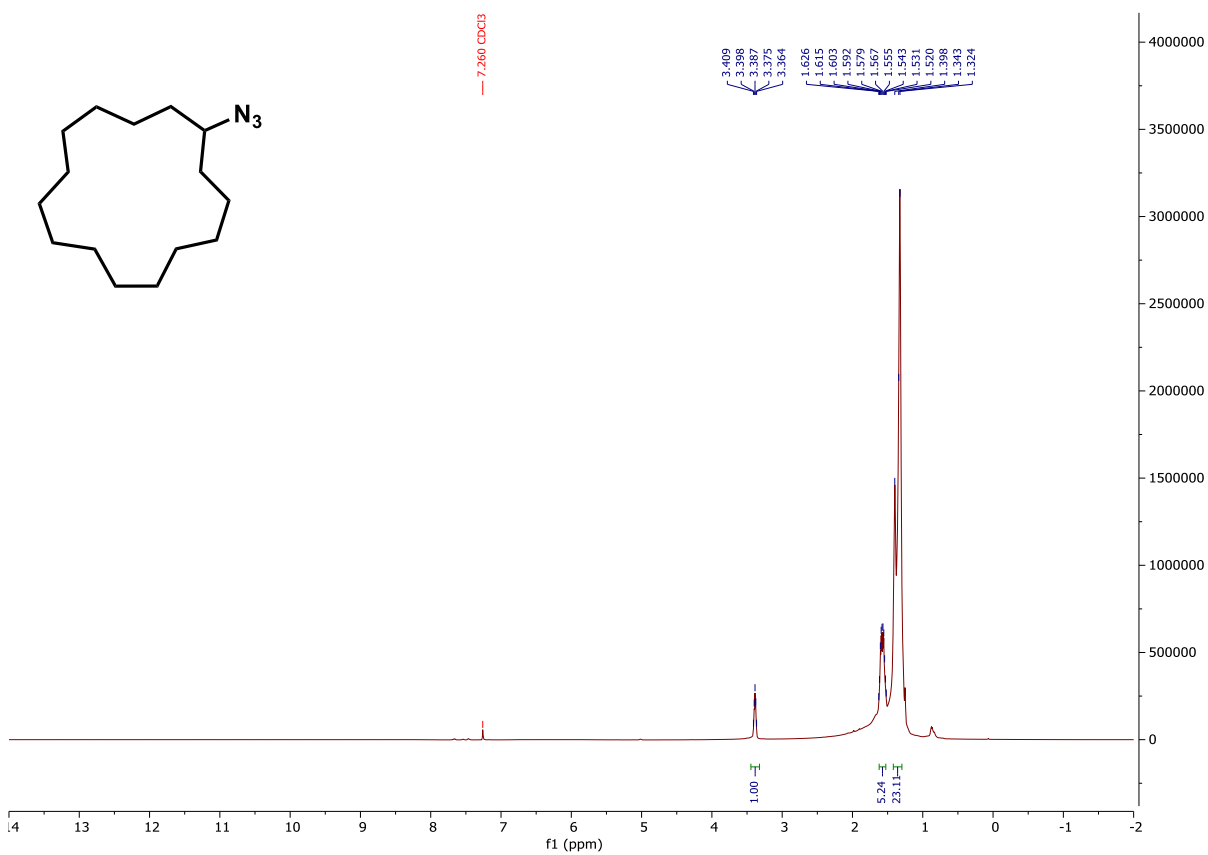

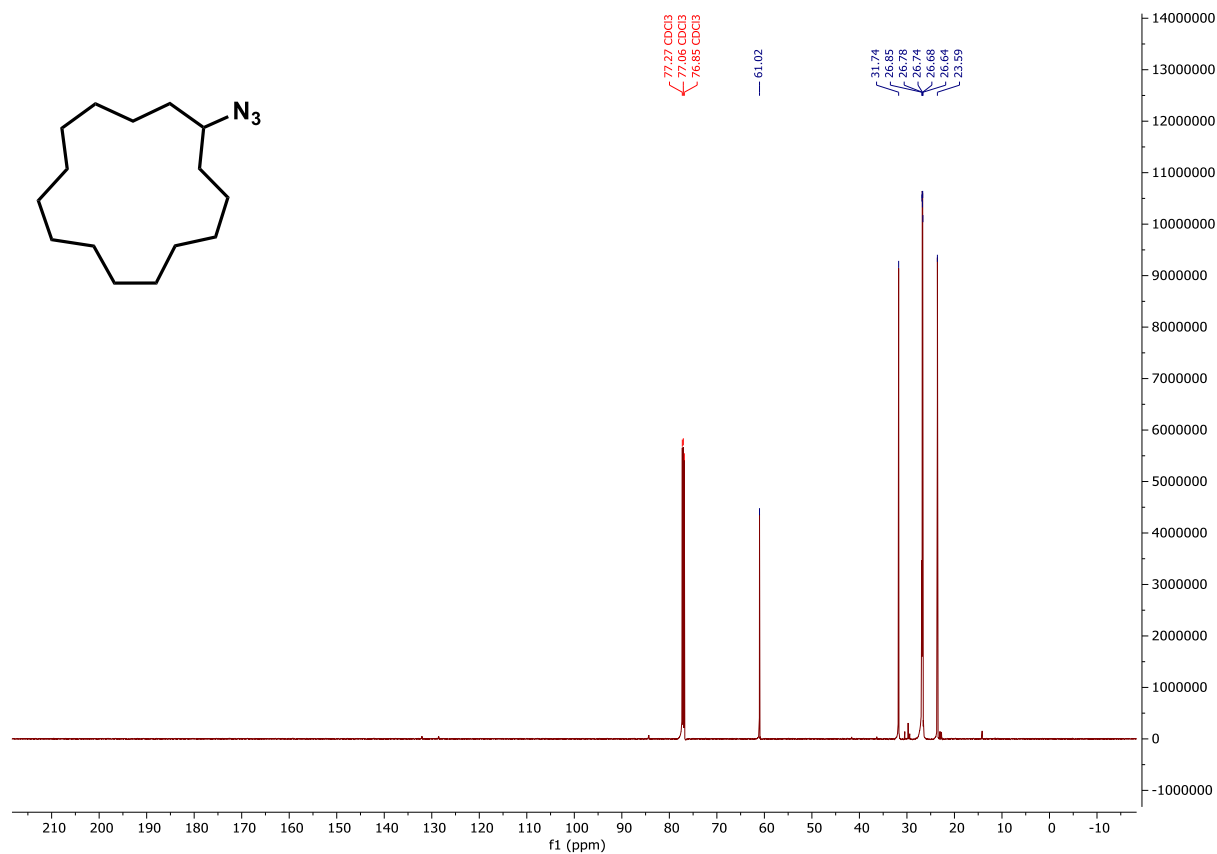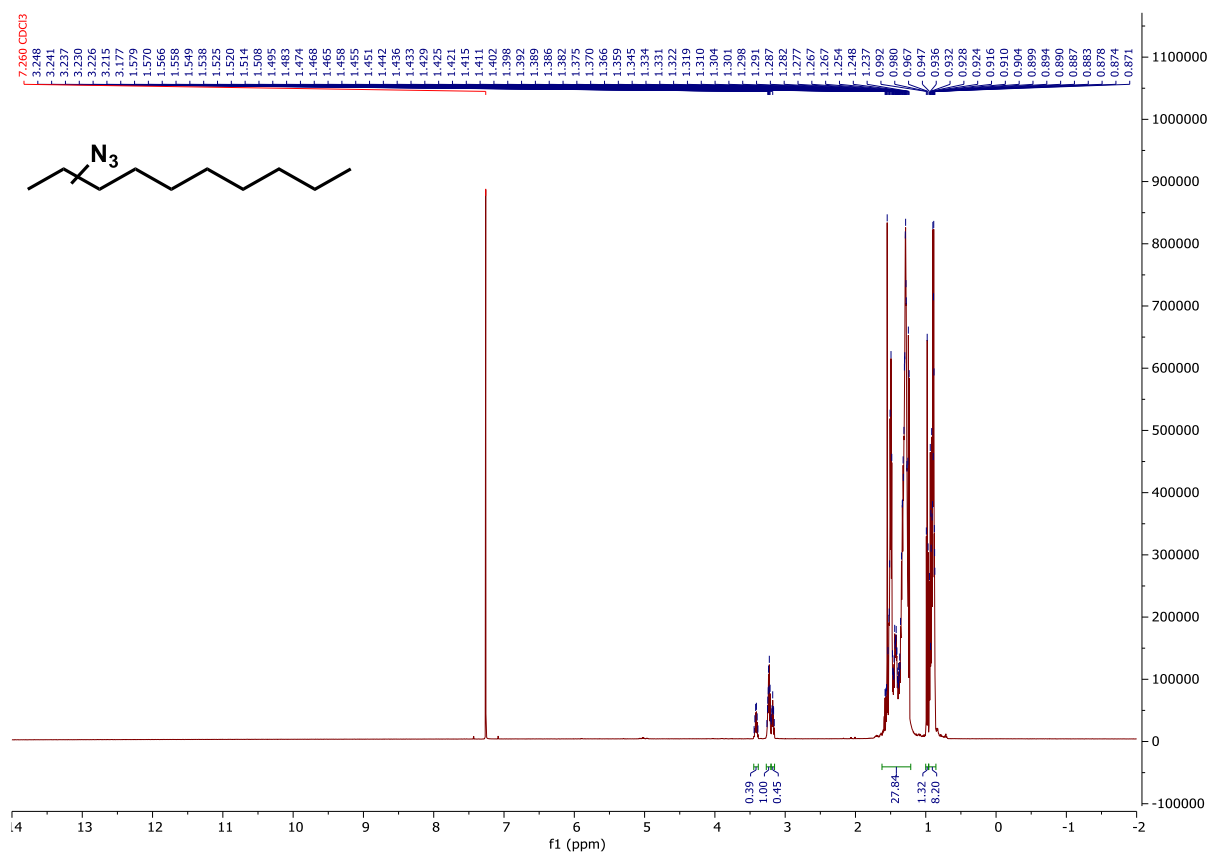

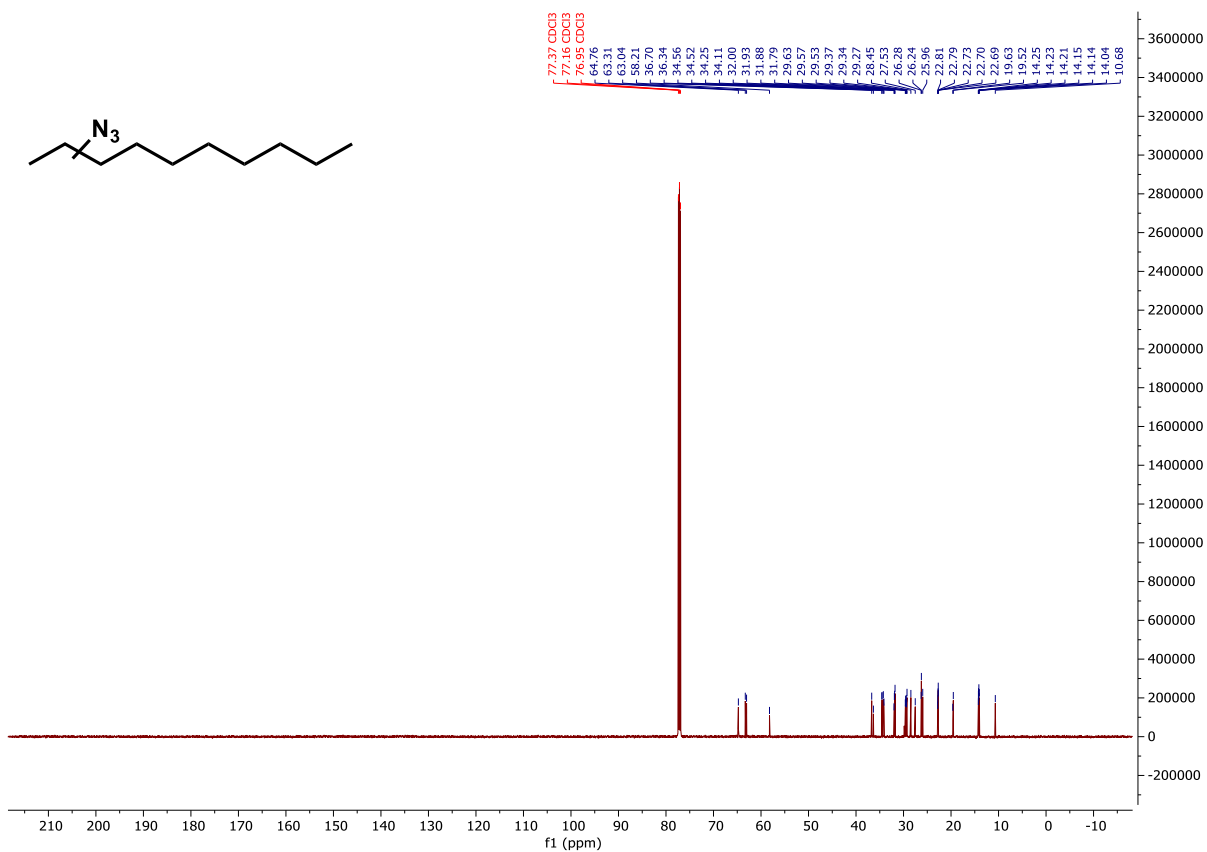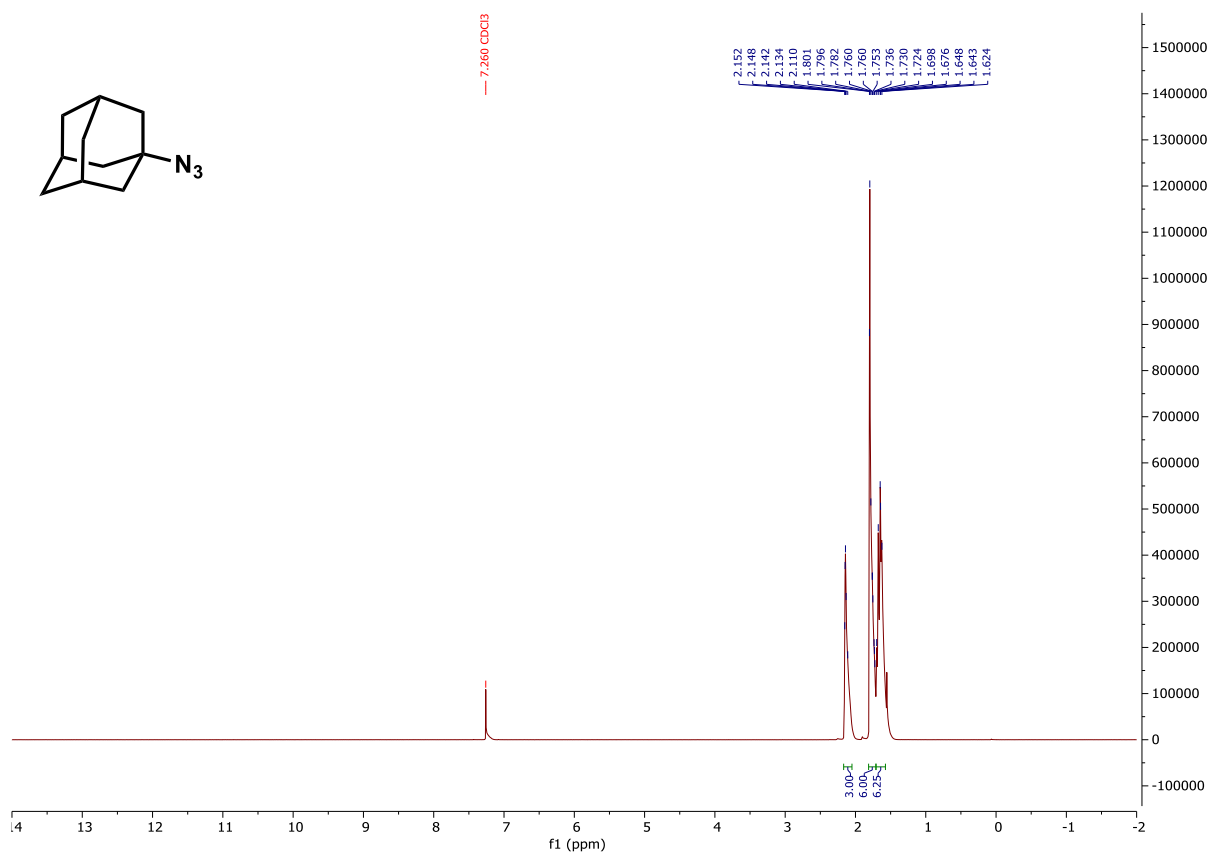



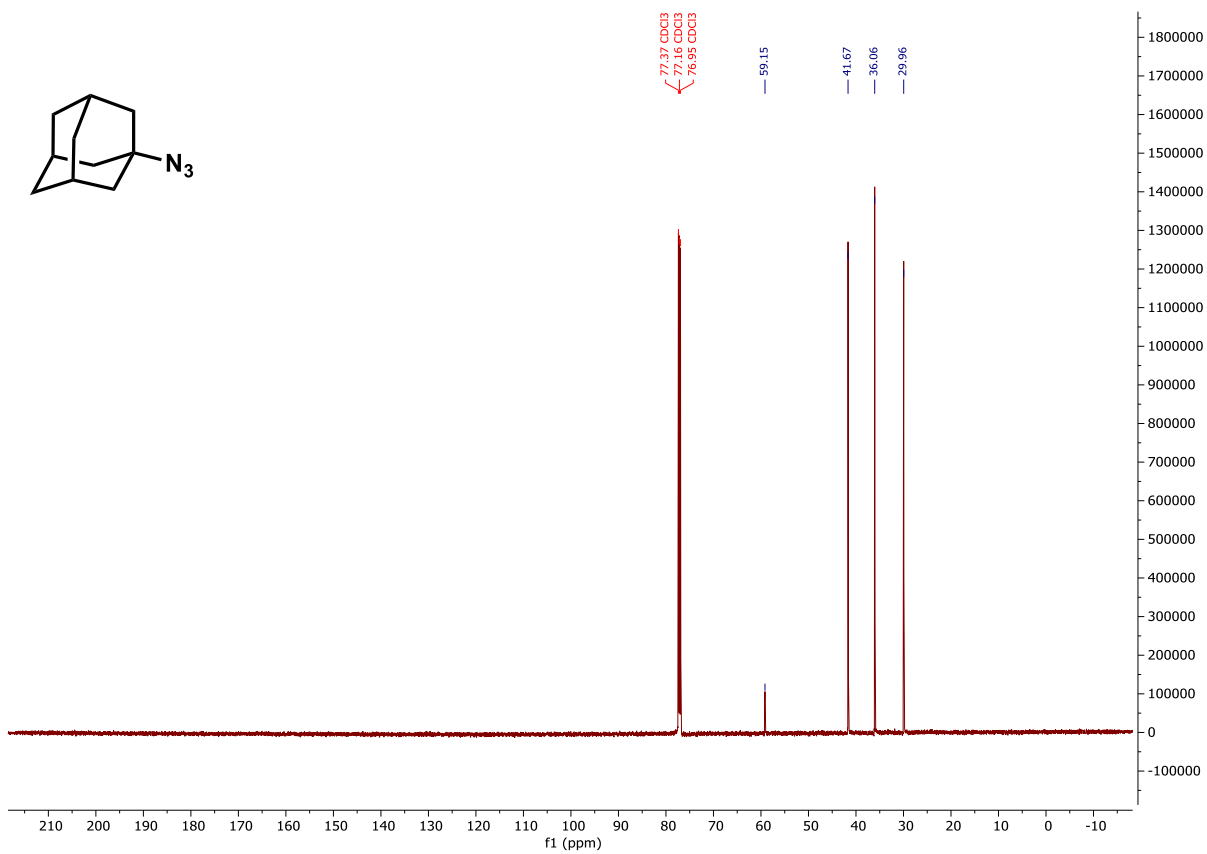

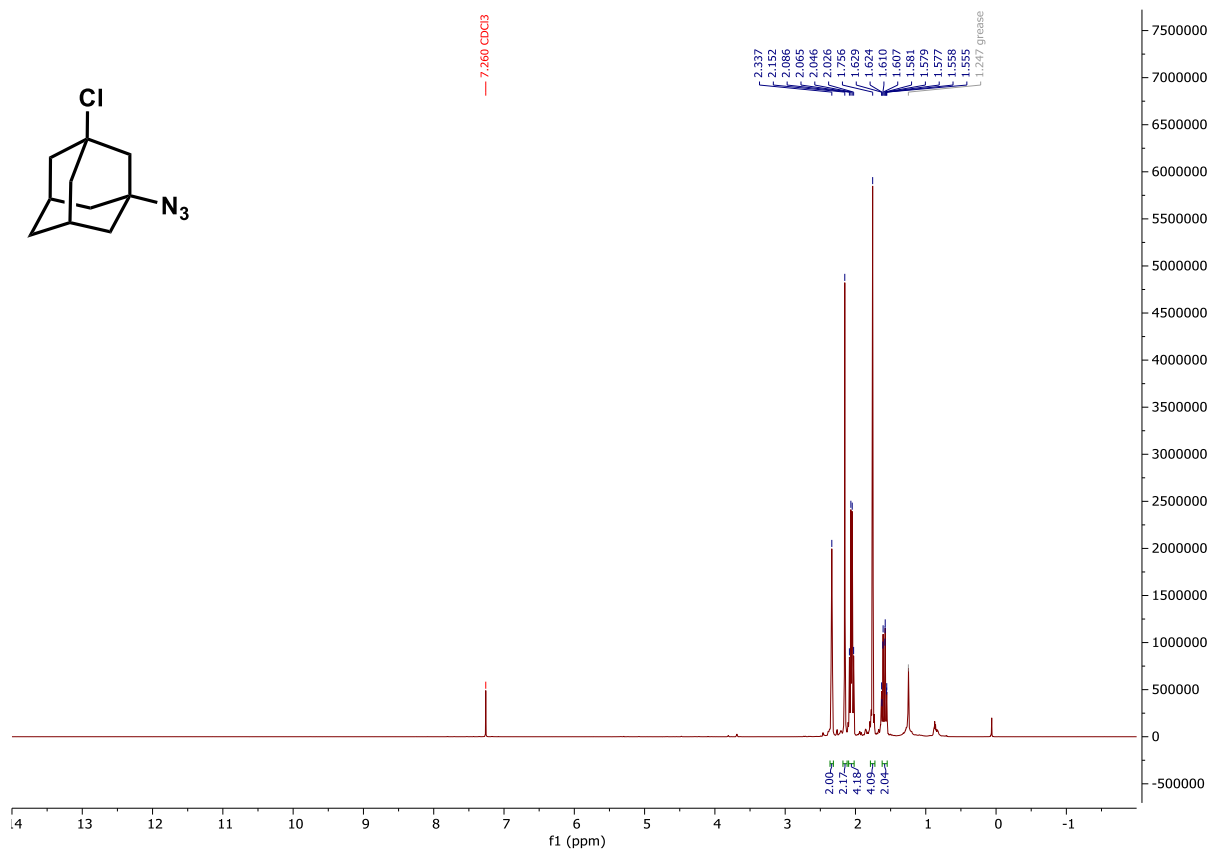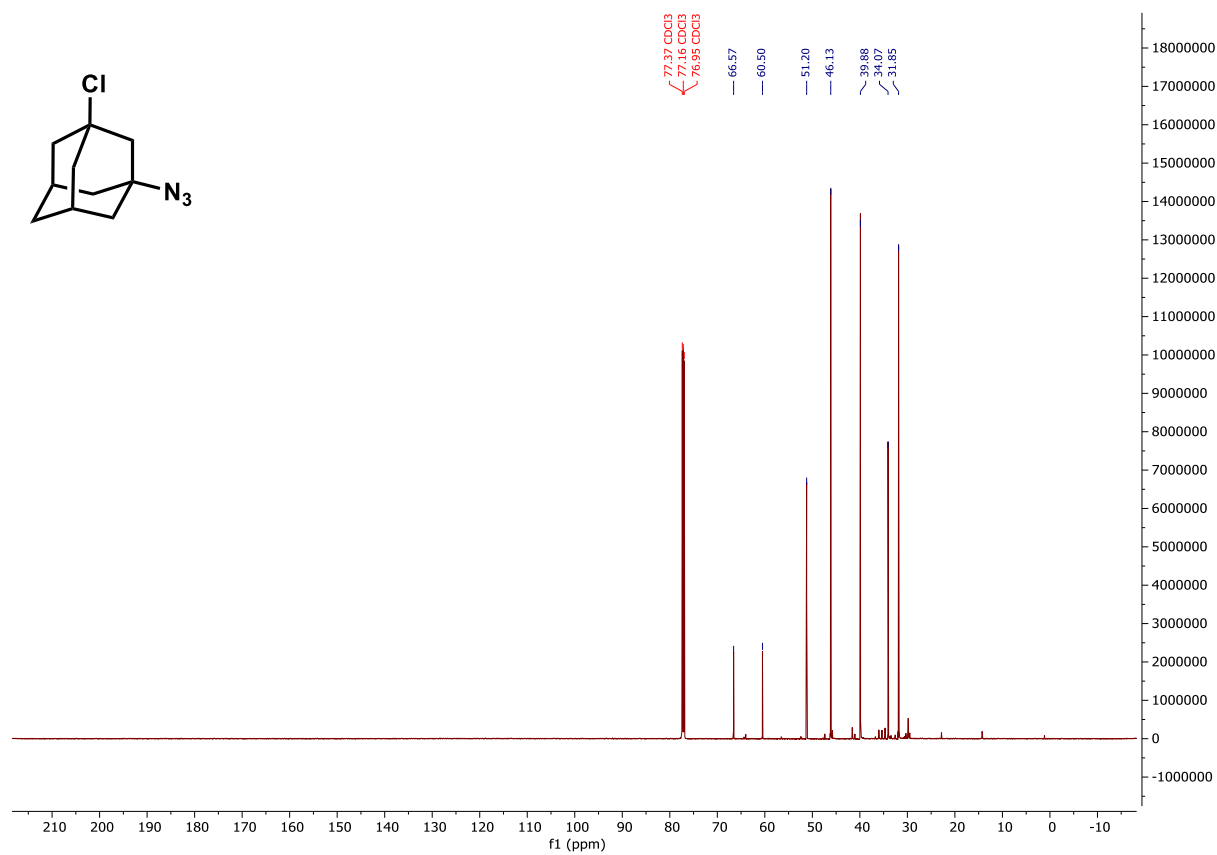

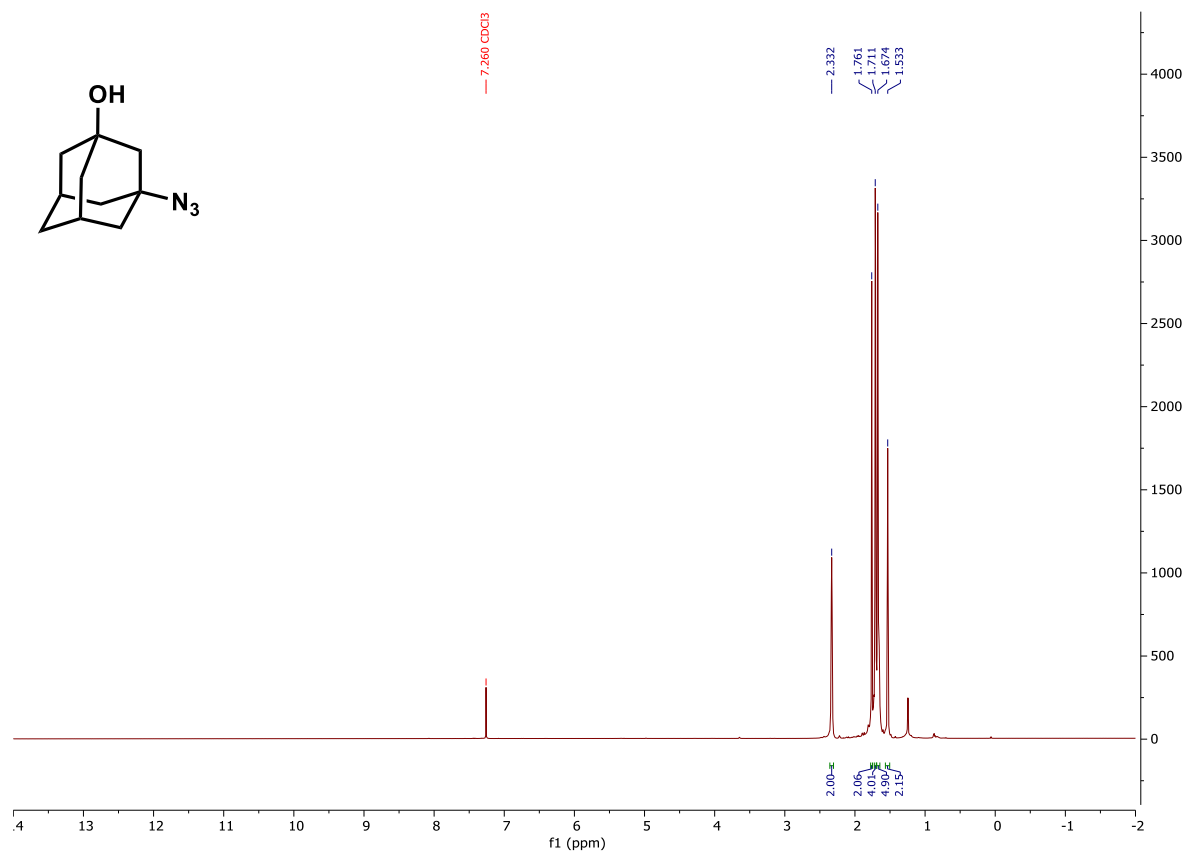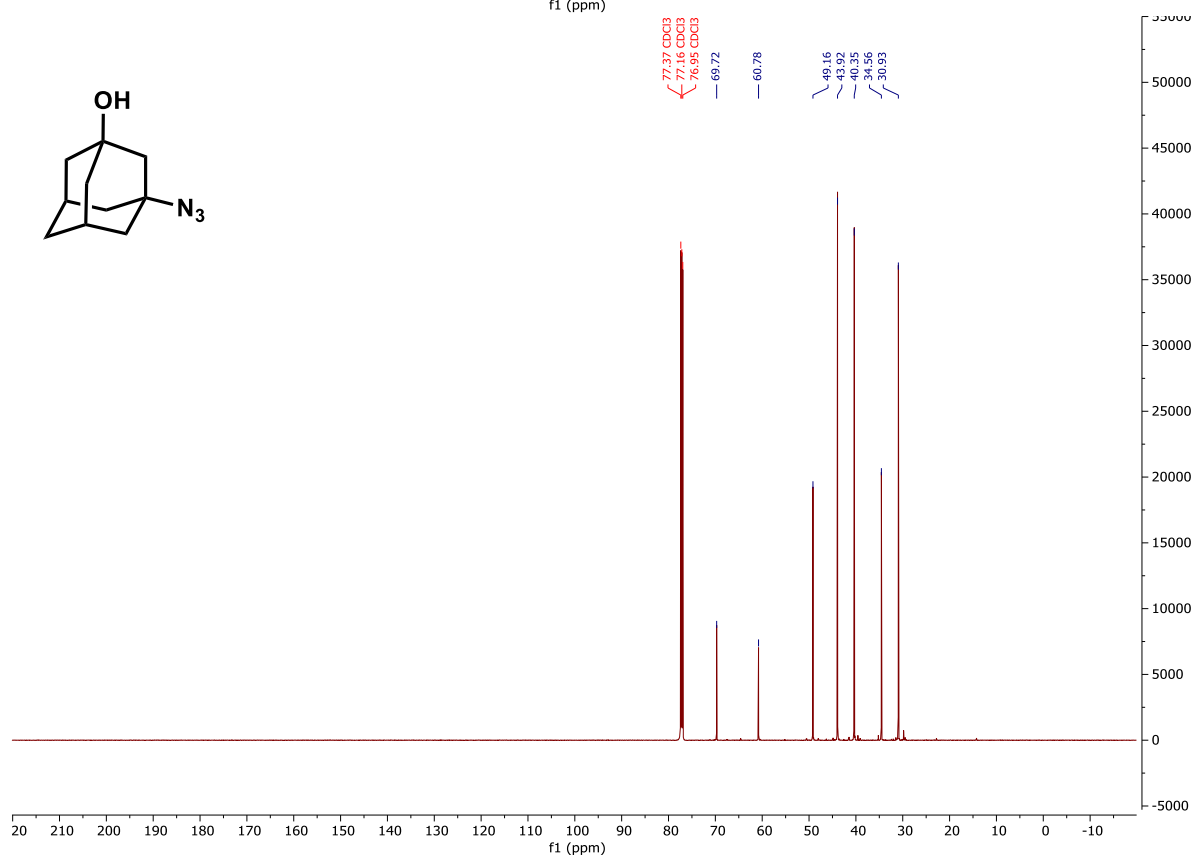

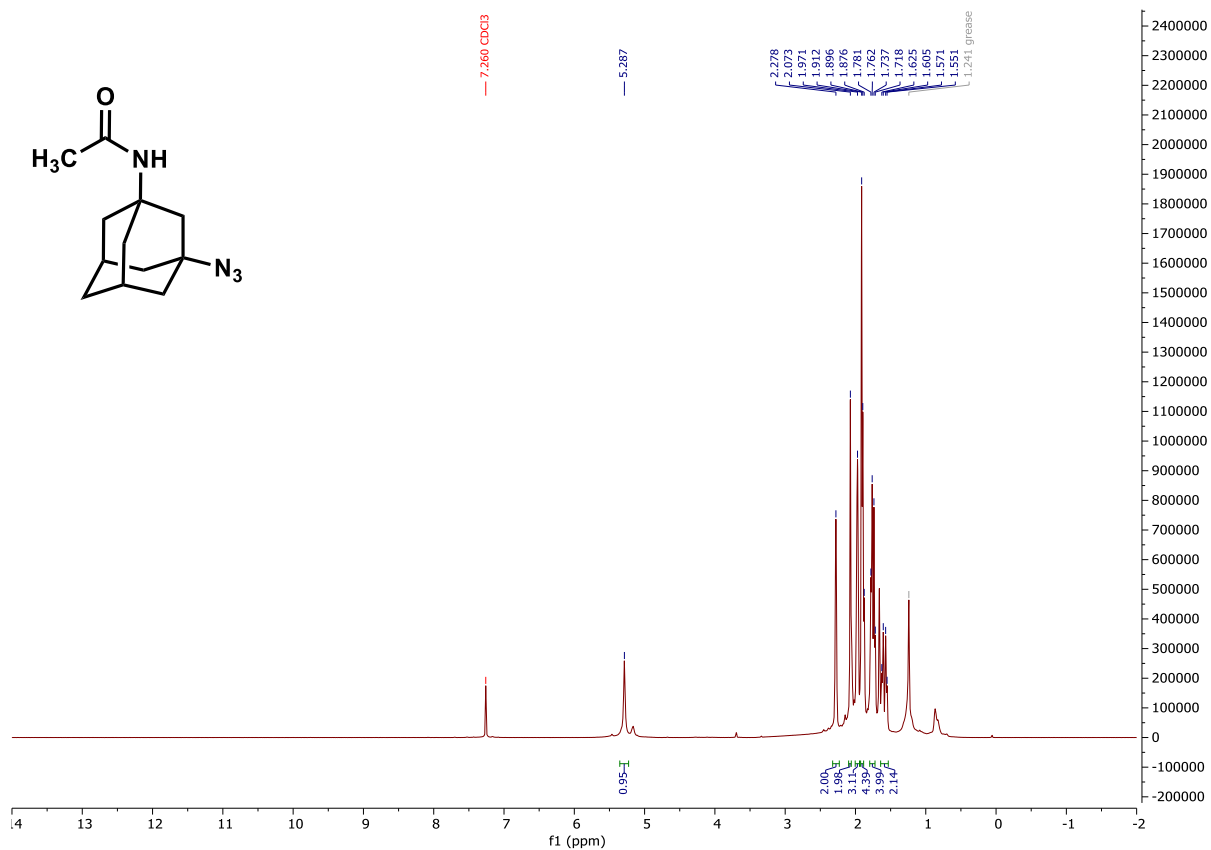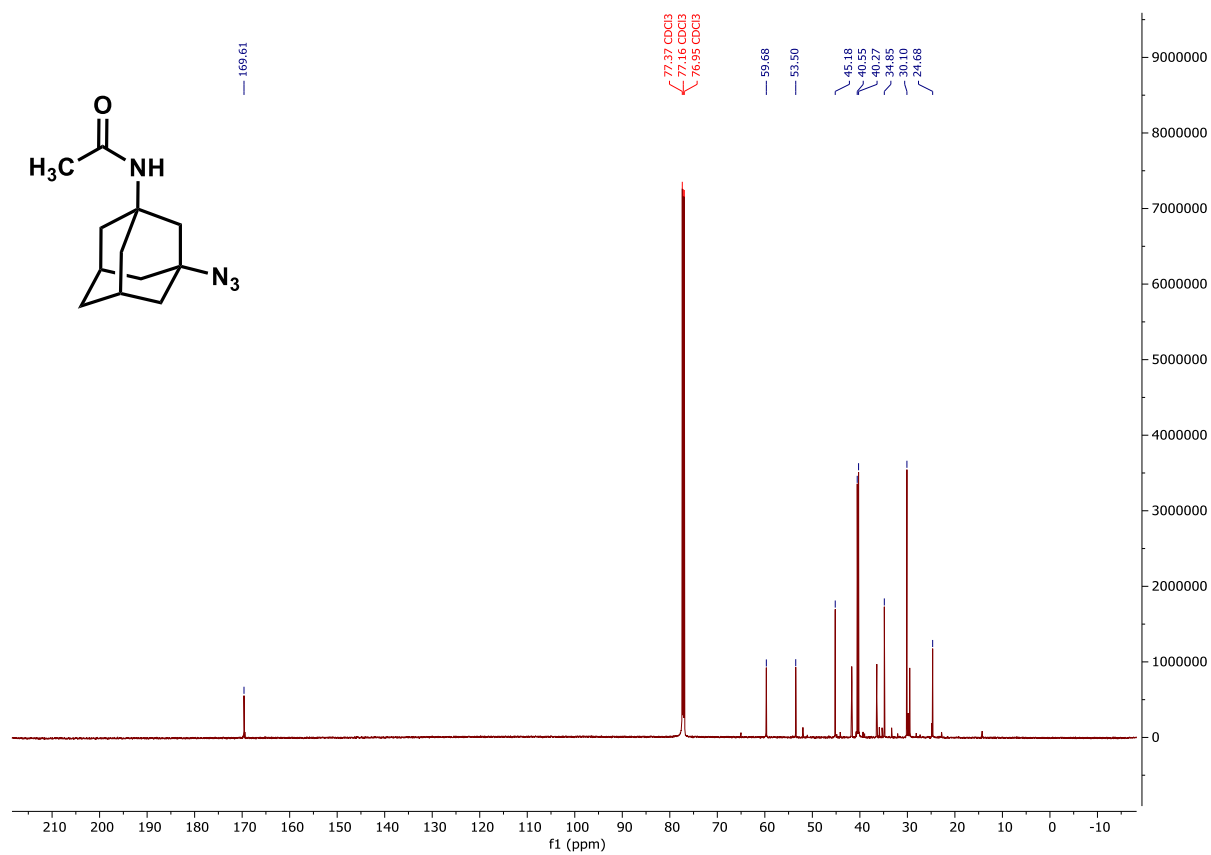



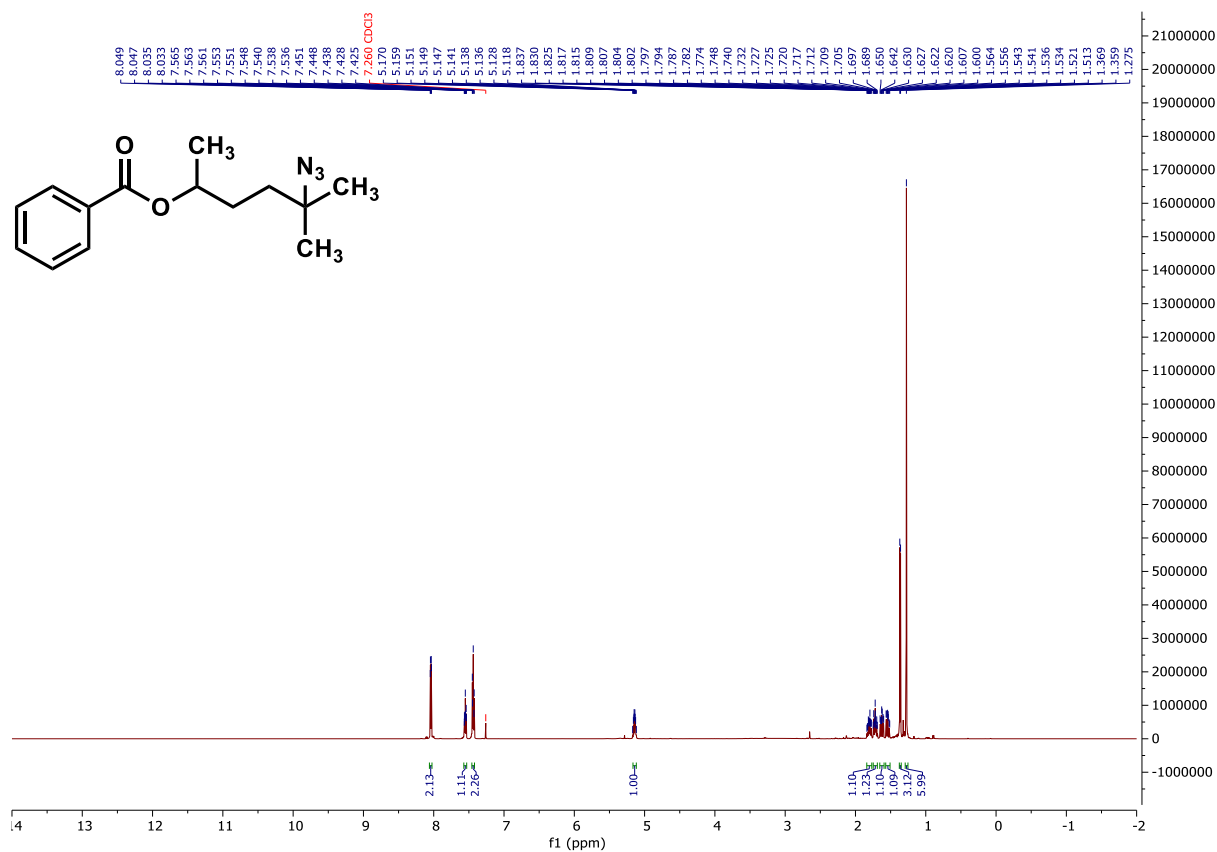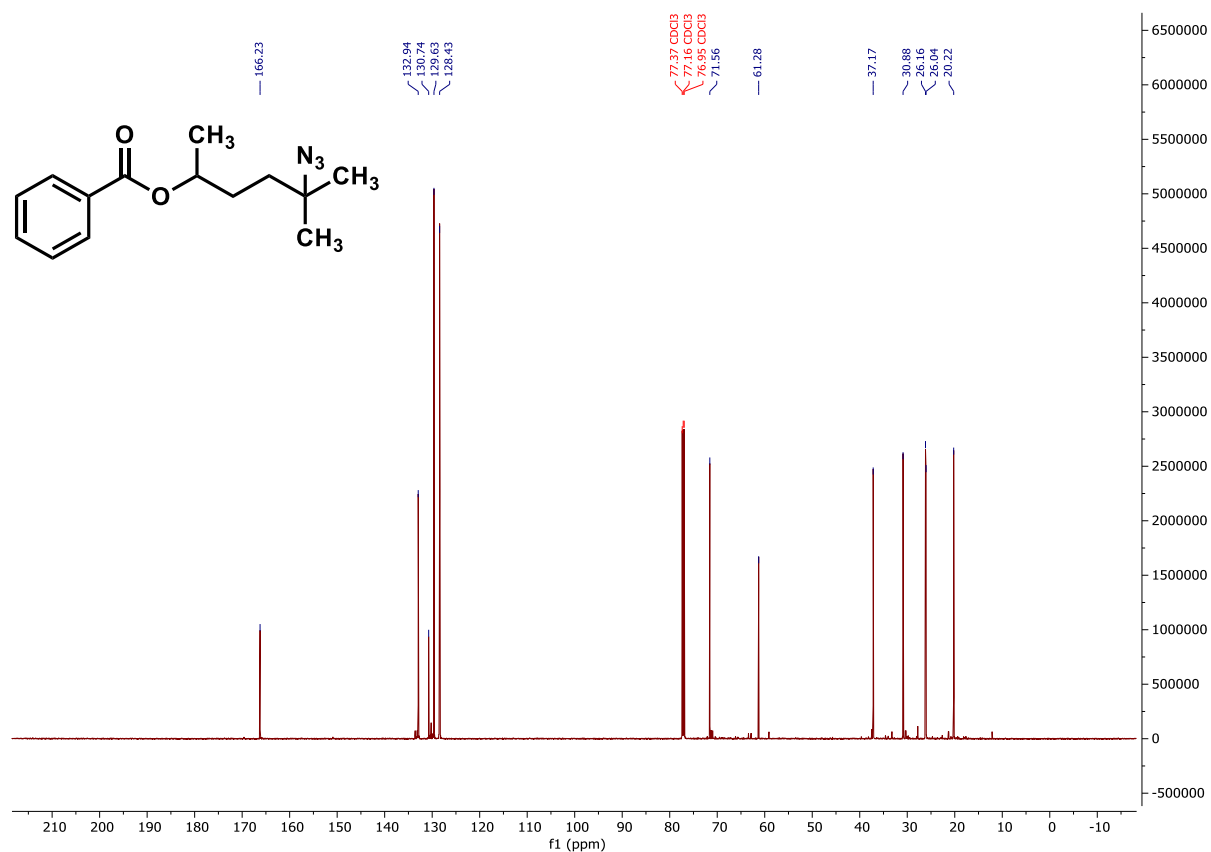

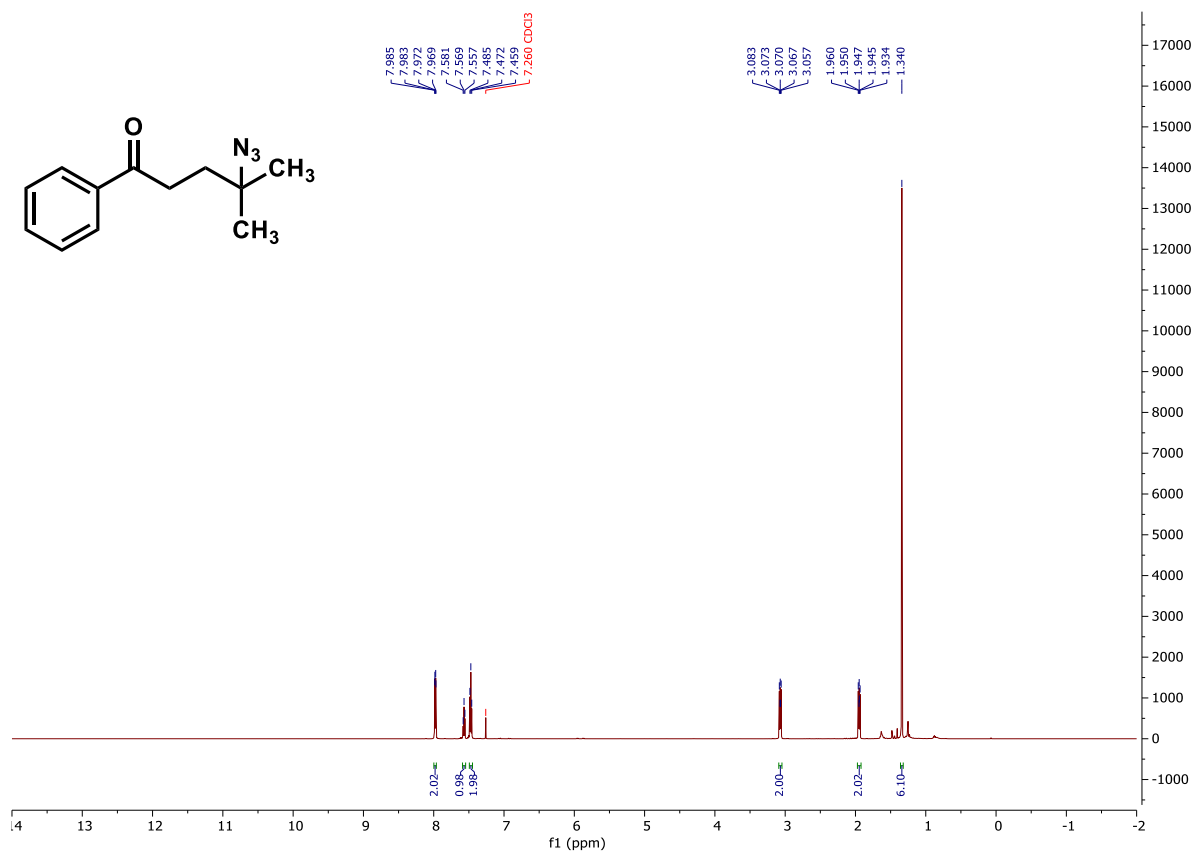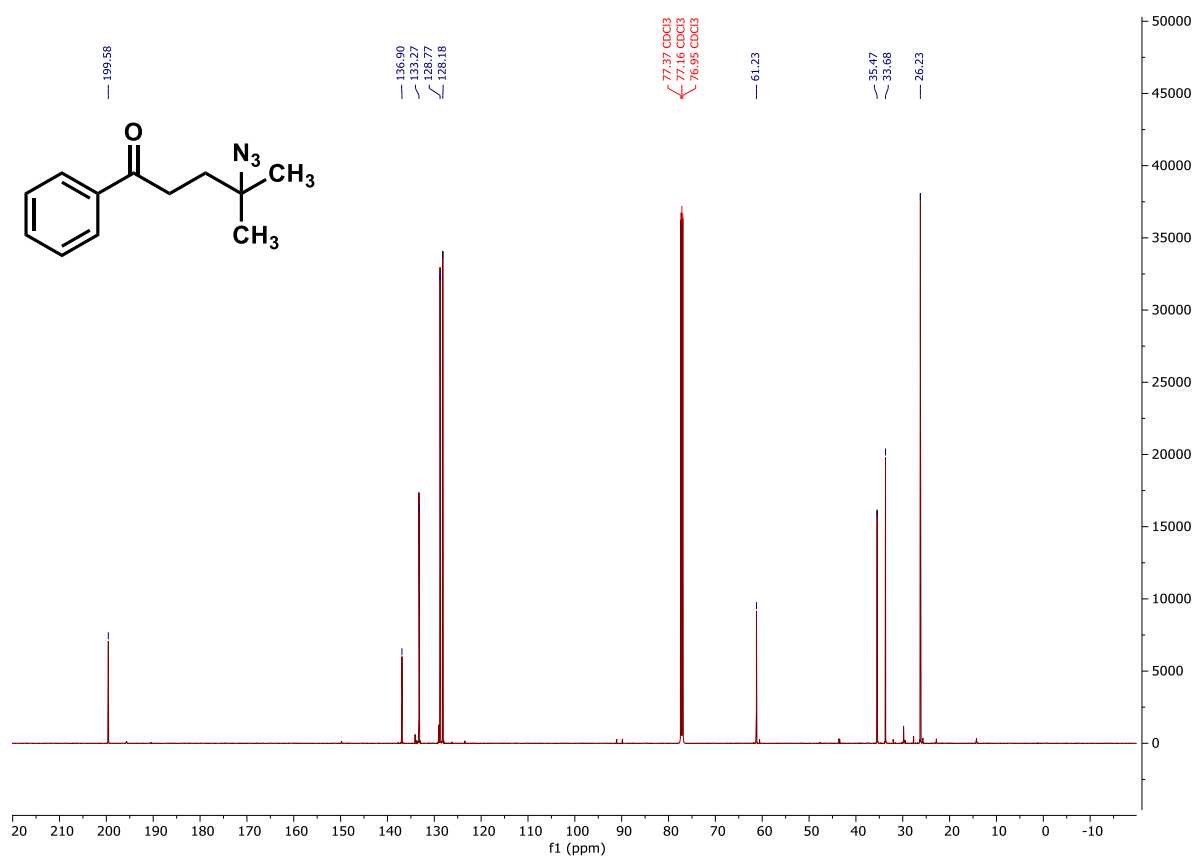

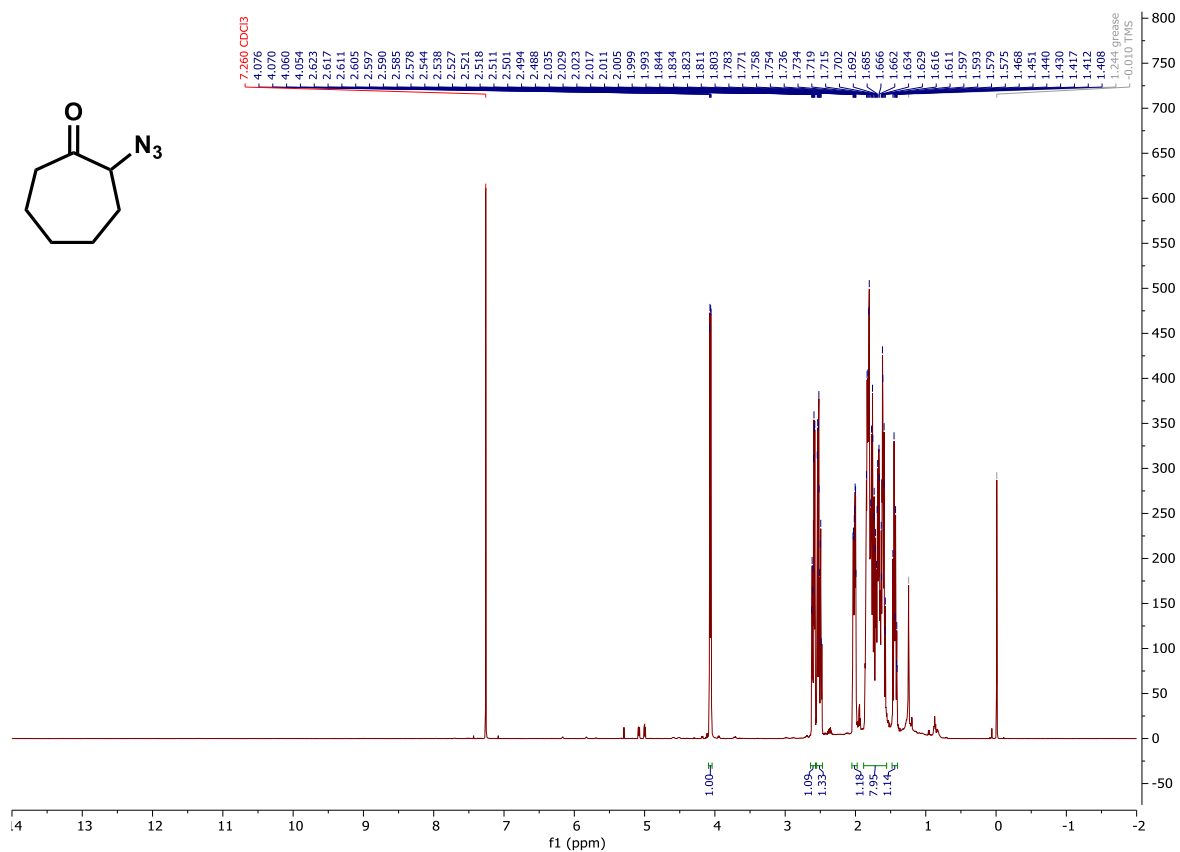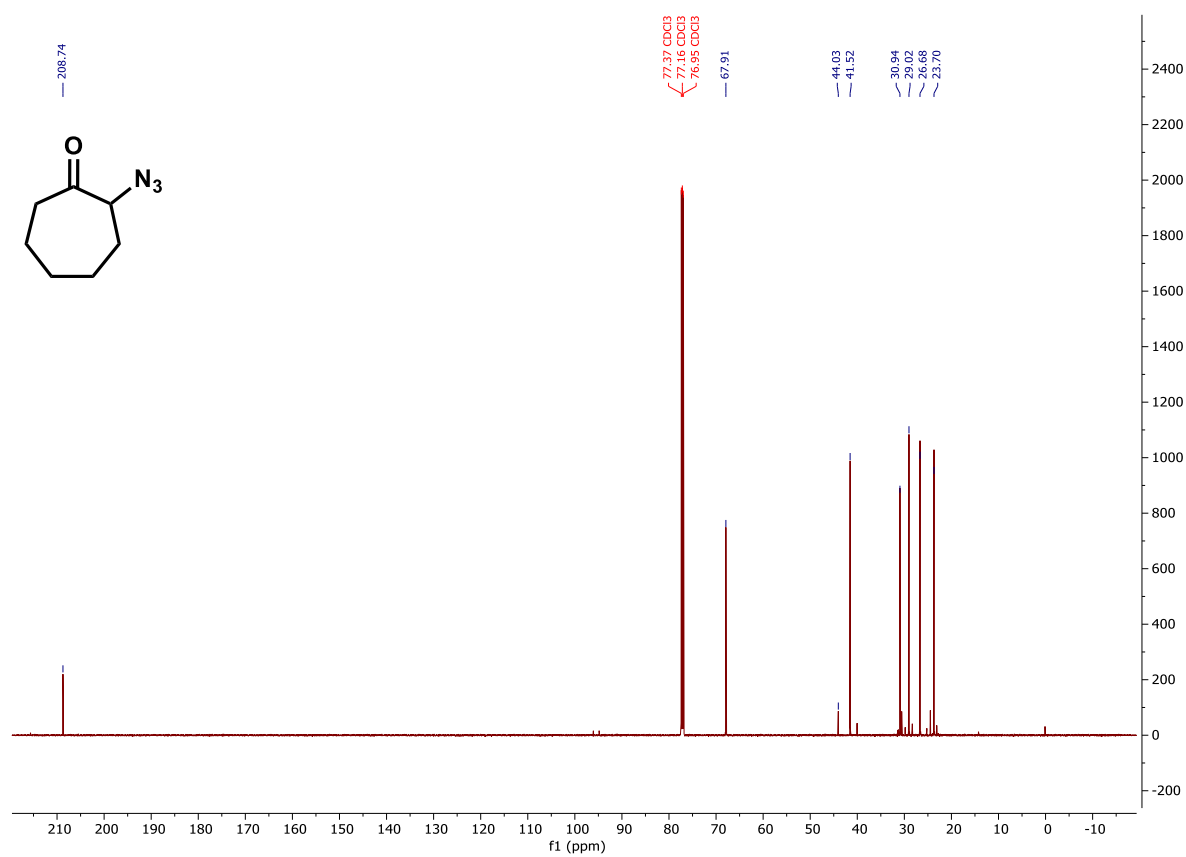



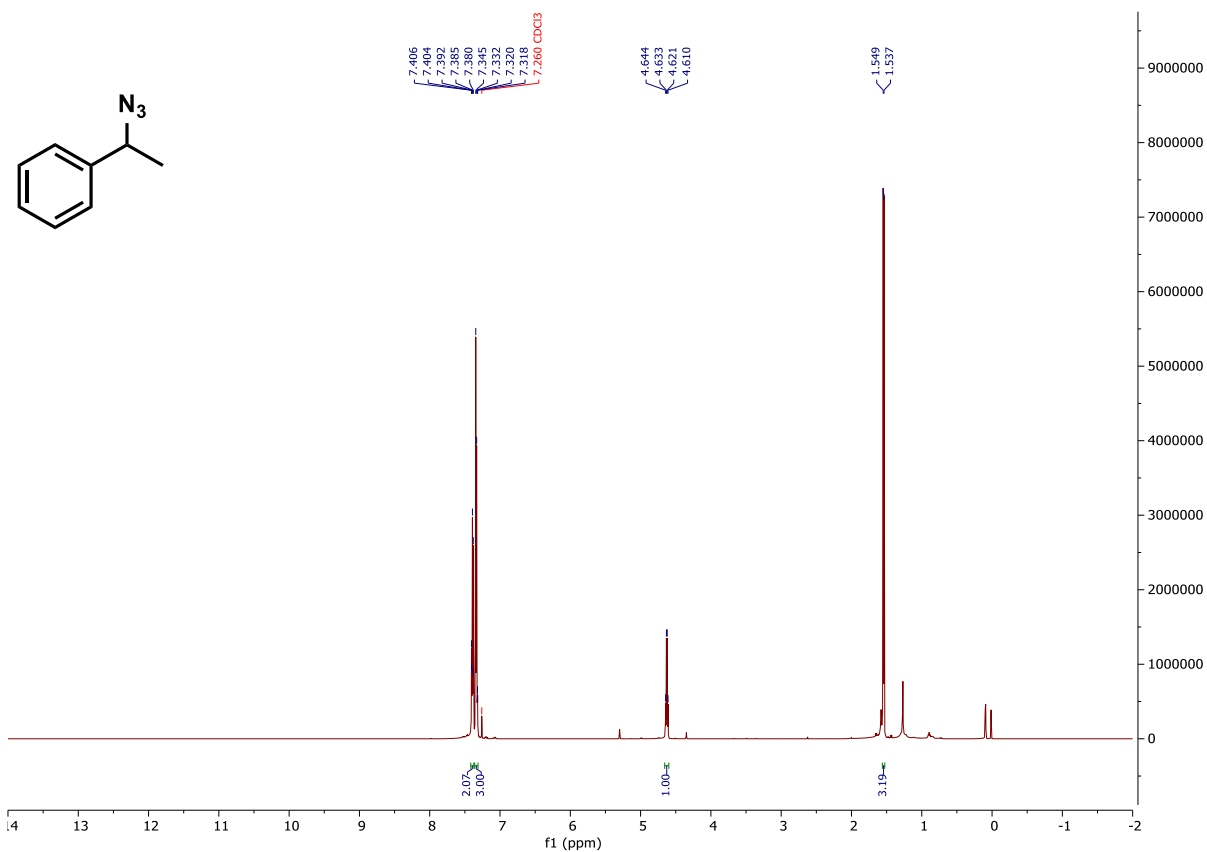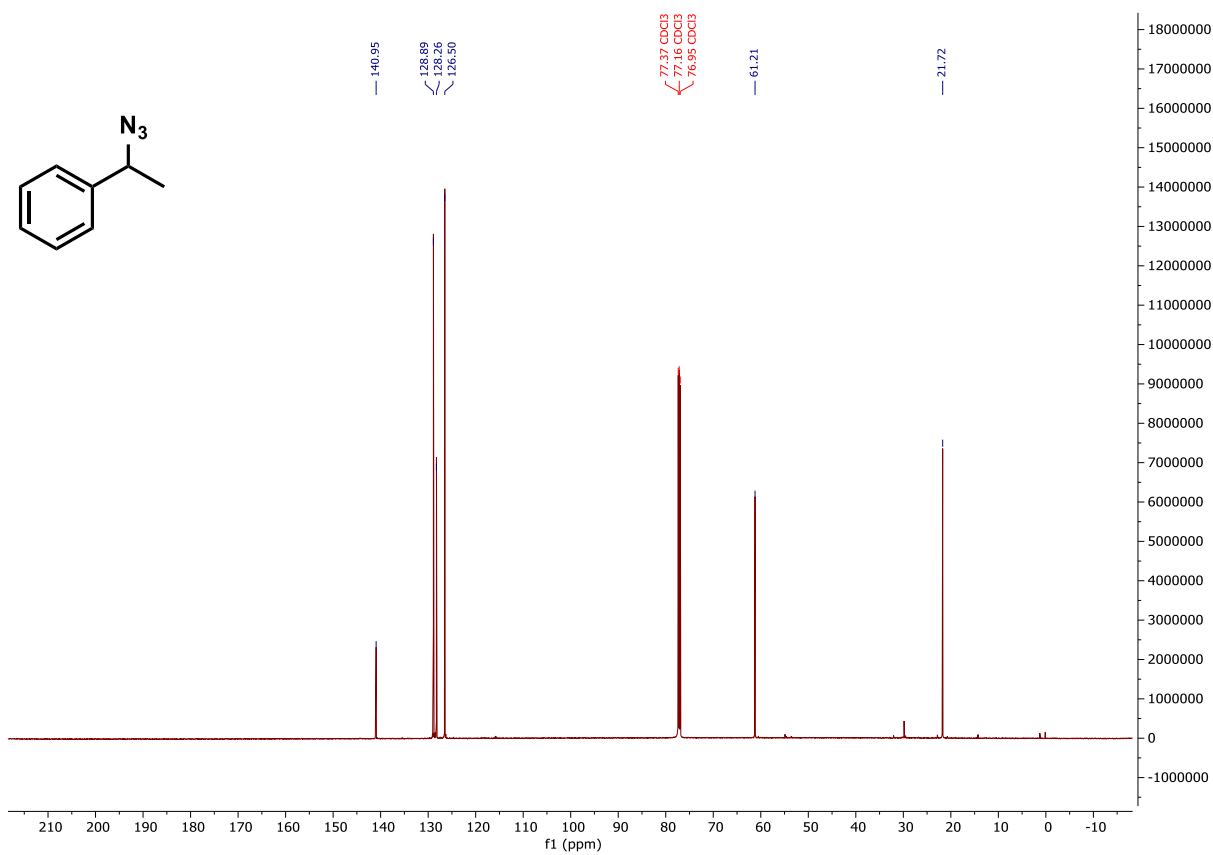

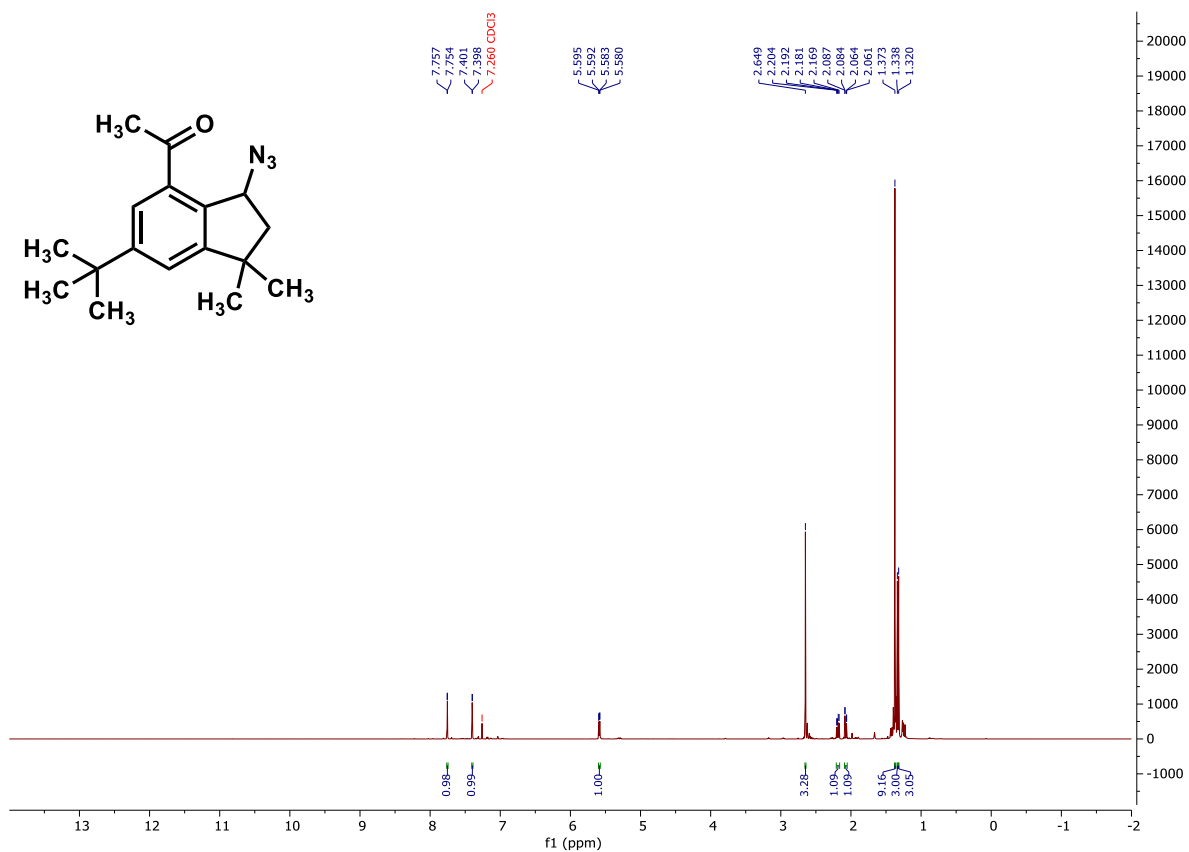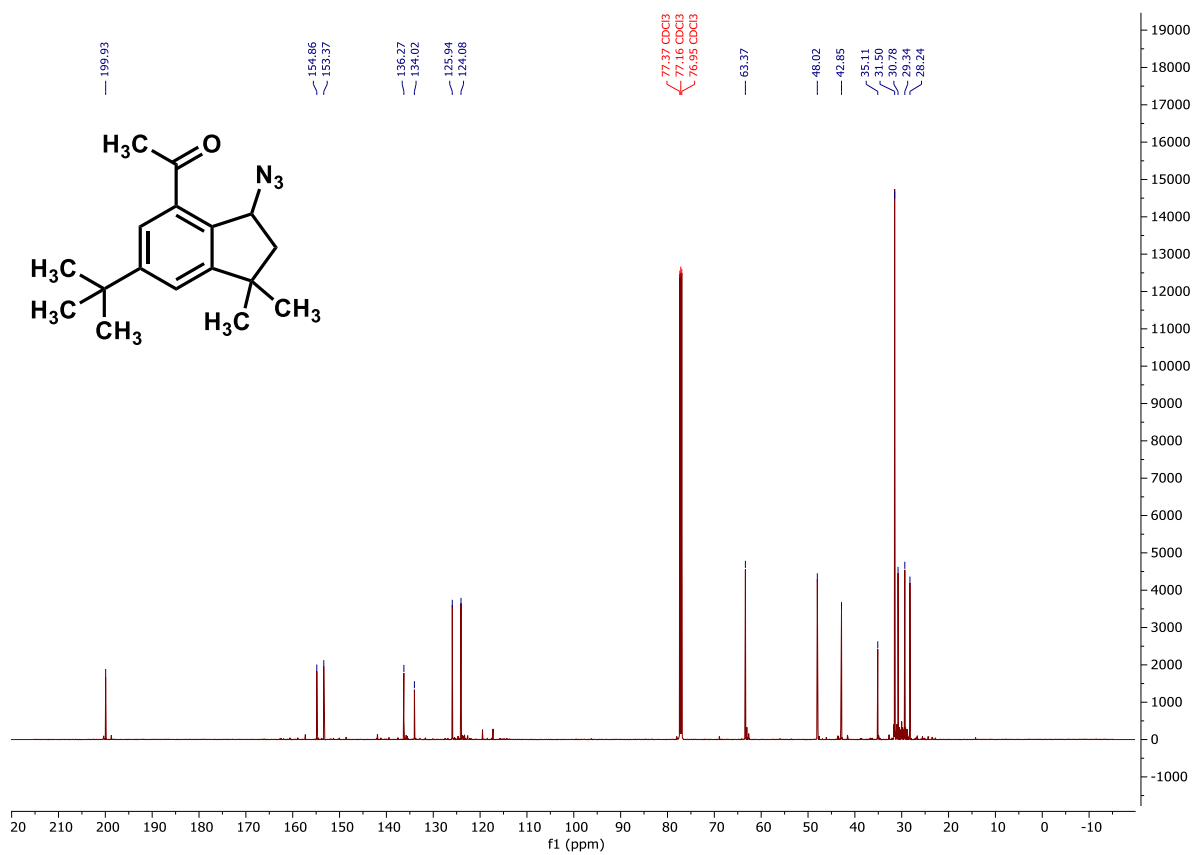

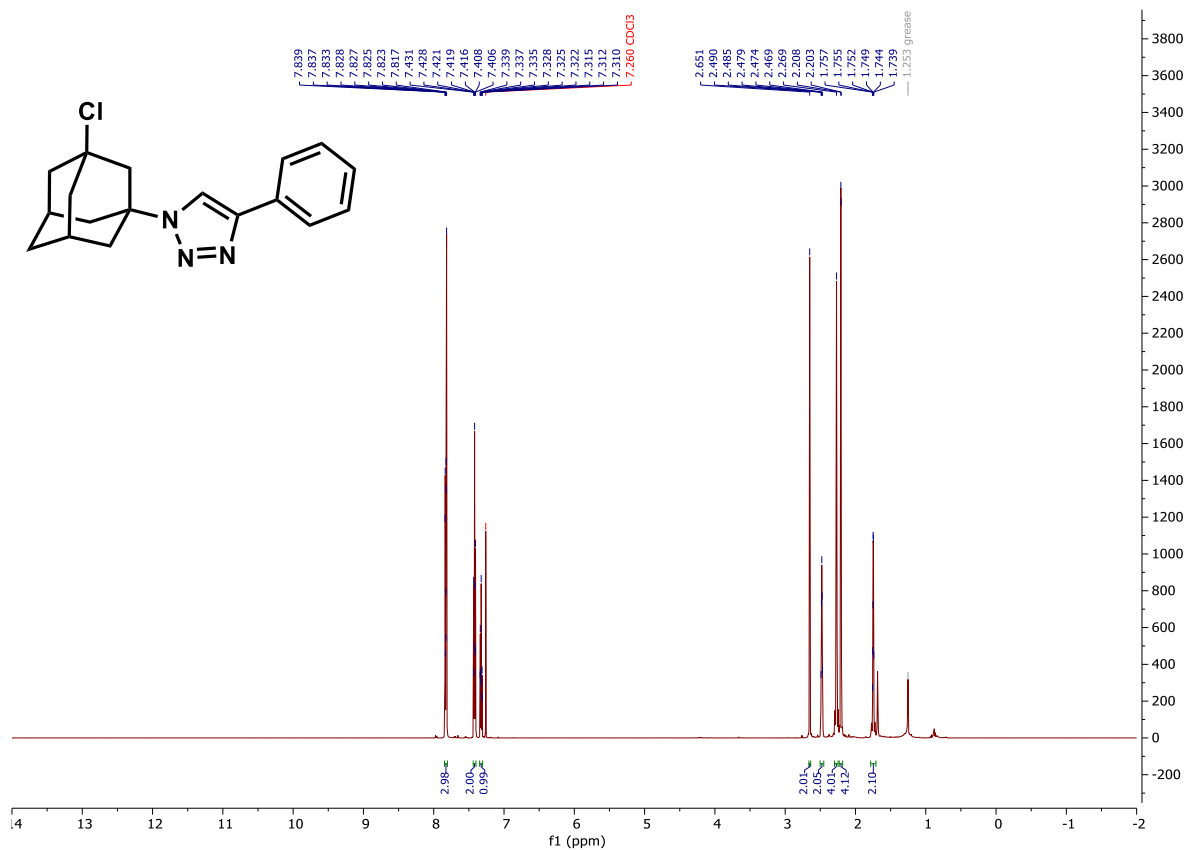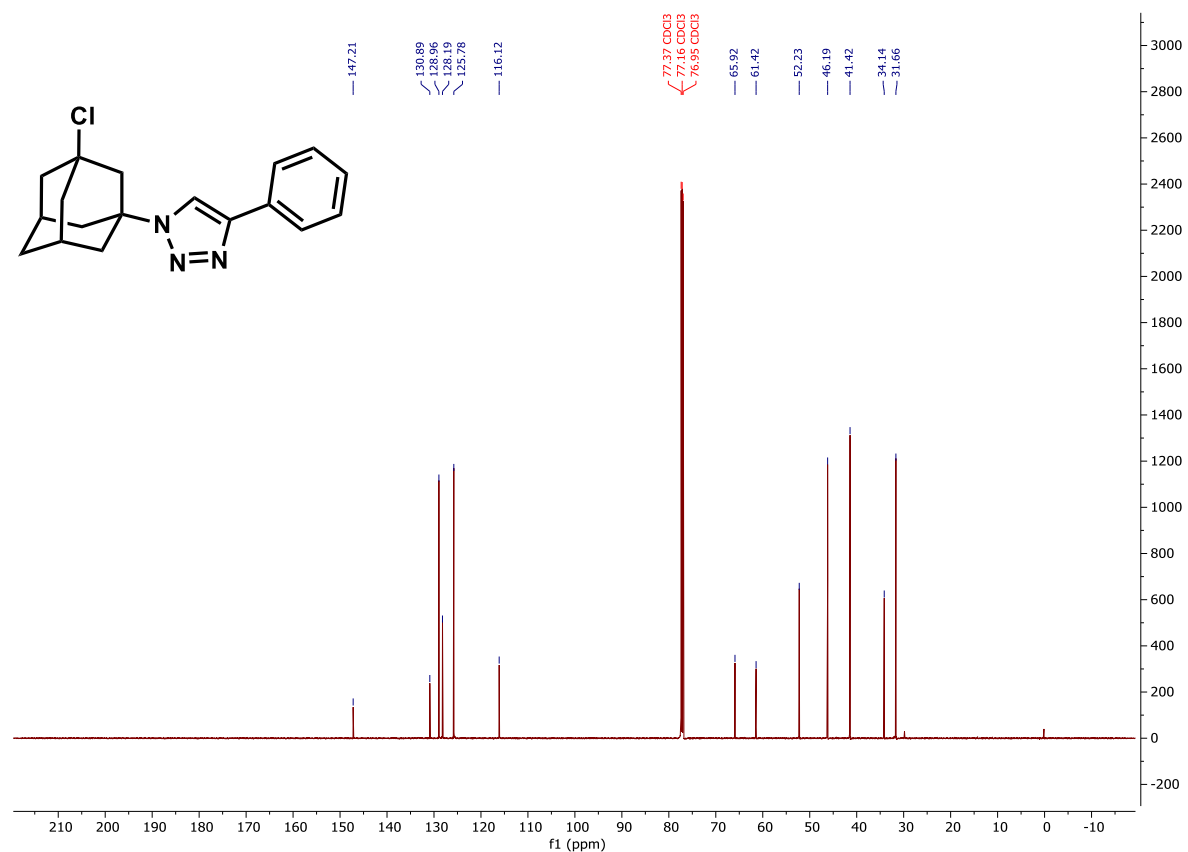

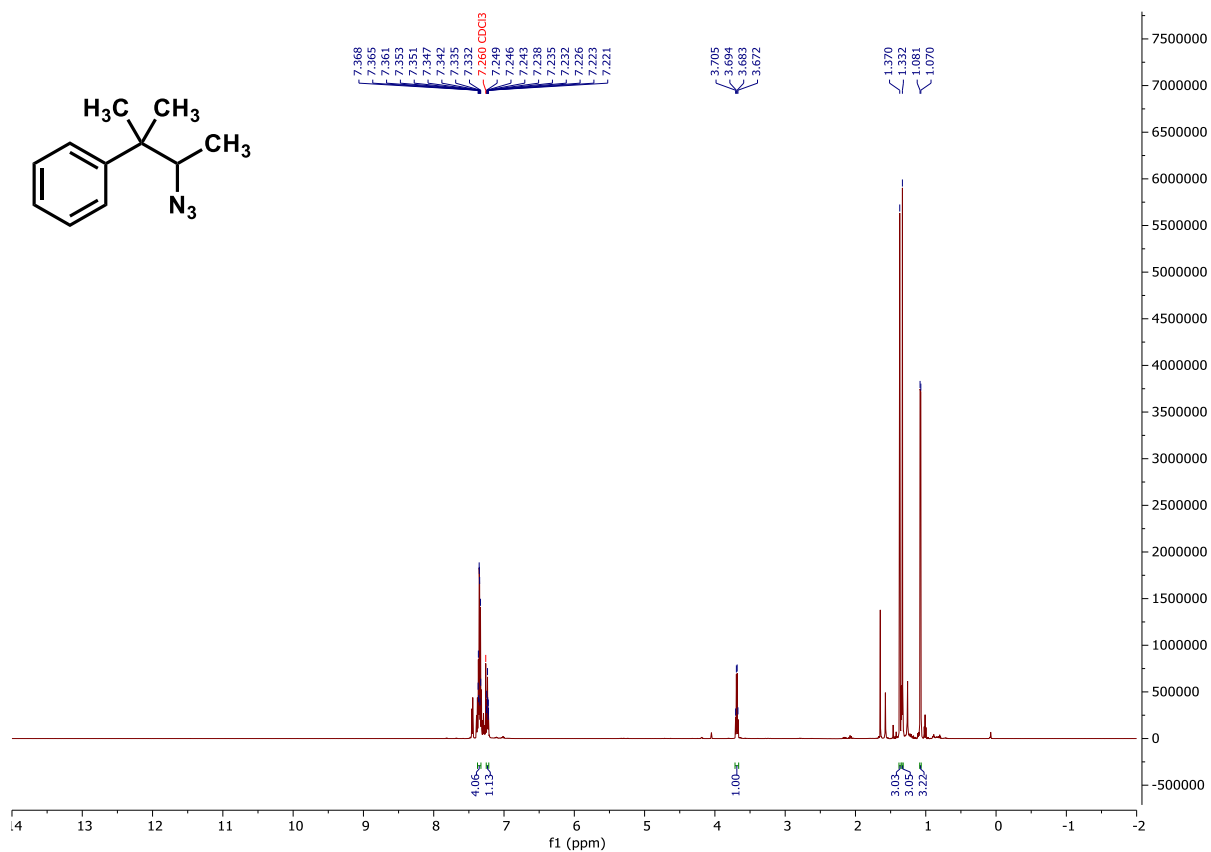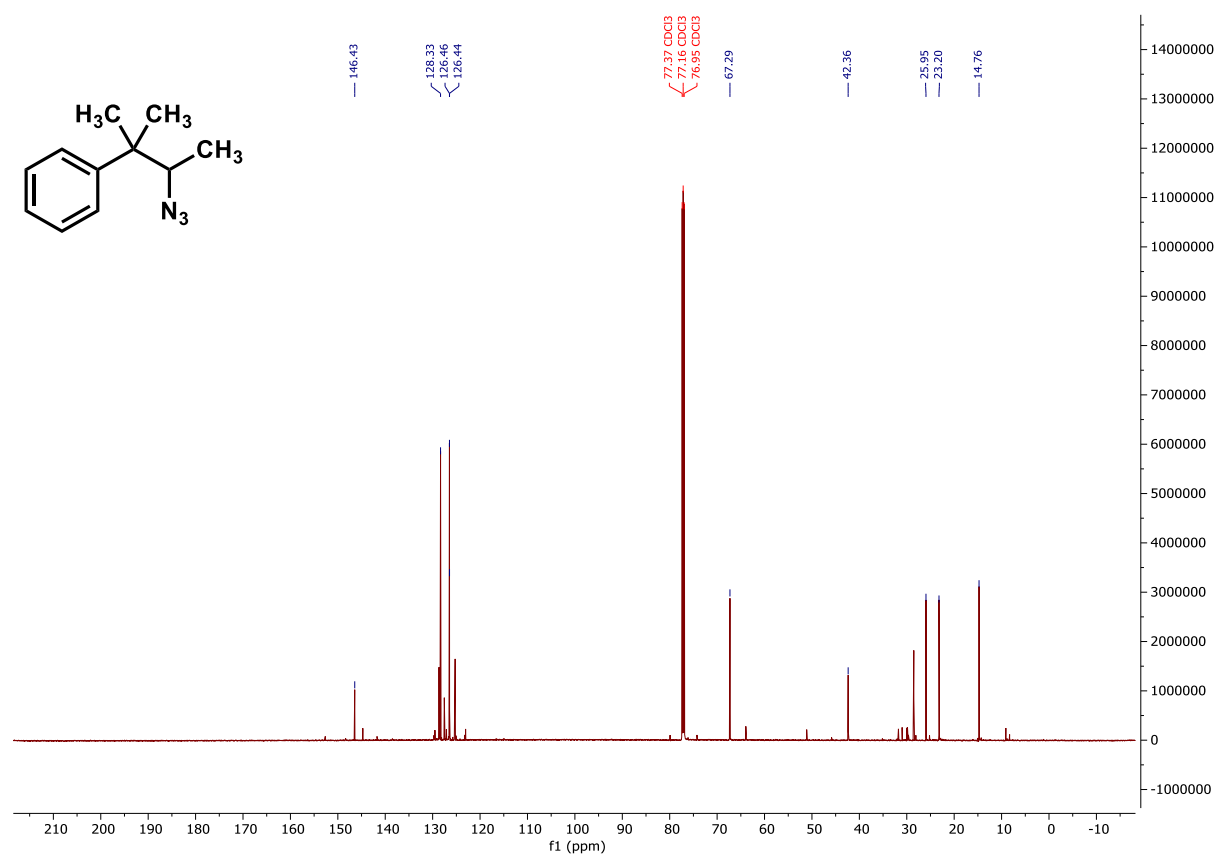

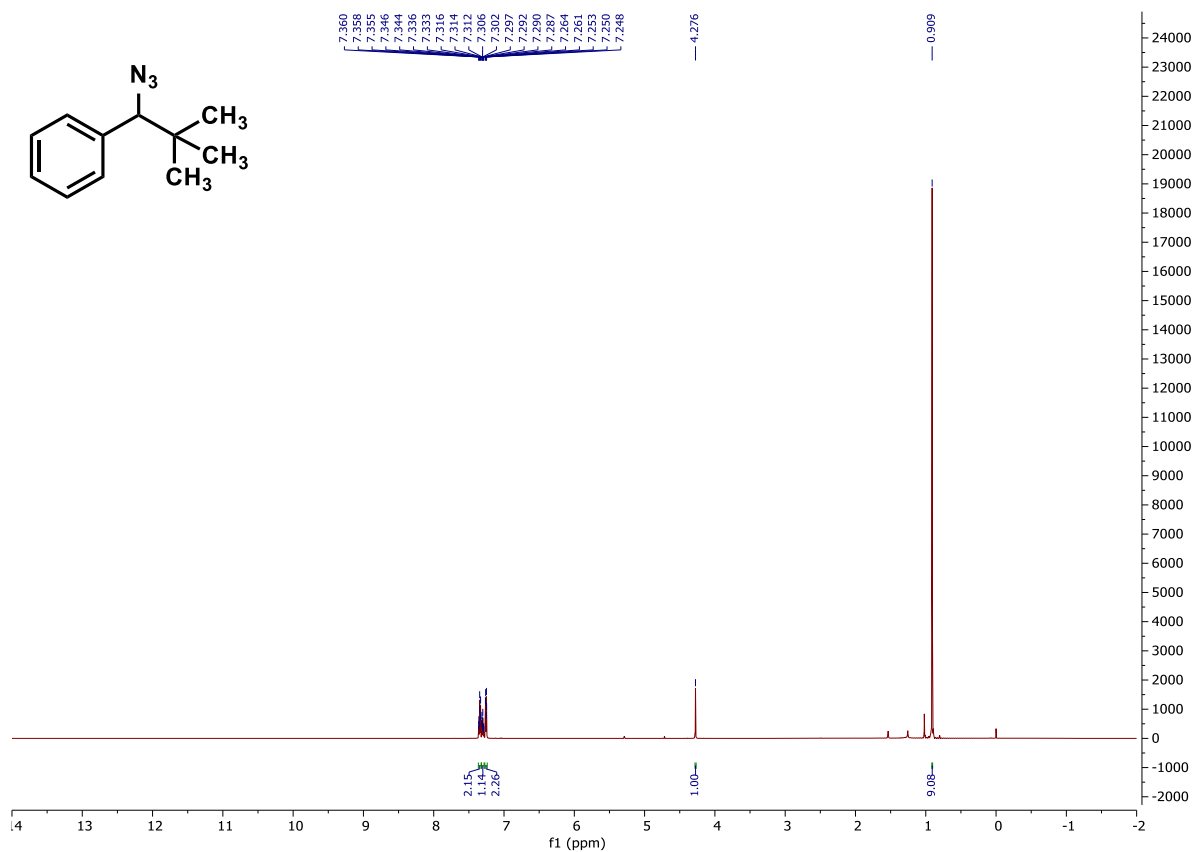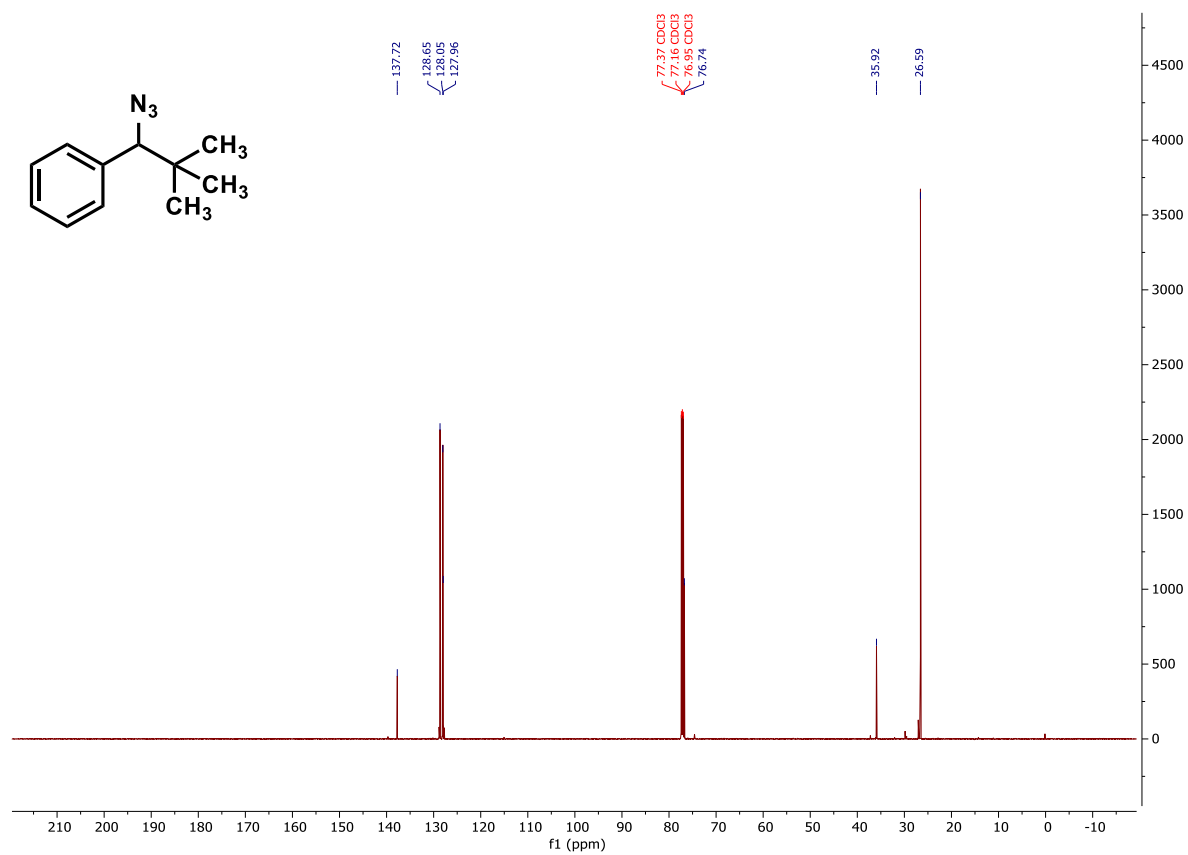

## References for Supporting Information

1. Lu, Y-C.; Kooa, S-C.; West, J. Decatungstate-photocatalysed C(sp<sup>3</sup>)-H azidation. *Chem. Commun.* **2022**, 58, 4869 – 4872.
2. Niu, L.; Jiang, C.; Liang, Y.; Liu, D.; Bu, F.; Shi, R.; Chen, H.; Chowdhury, A.; Lei, A. Manganese-Catalyzed Oxidative Azidation of C(sp<sup>3</sup>)-H Bonds under Electrophotocatalytic Conditions. *J. Am. Chem. Soc.* **2020**, 142, 17693 – 17702.
3. (a.) West, J.; Bedell, T.; Sorensen J. The Uranyl Cation as a Visible-Light Photocatalyst for C(sp<sup>3</sup>)-H Fluorination. *Angew. Chem. Int. Ed.* **2016**, 55, 8923 – 8927.  
(b.) Yadav, A.; Srivastavaa, V.; Yadav, L. D. An easy access to fluoroalkanes by deoxygenative hydrofluorination of carbonyl compounds via their tosylhydrazones. *Chem. Commun.* **2013**, 49, 2154 – 2156.
4. (a.) Tanemura, K. Silica gel-mediated hydrohalogenation of unactivated alkenes using hydrohalogenic acids under organic solvent-free conditions. *Tetrahedron Letters.* **2018**, 59, 49, 4293 – 4298.  
(b.) Zhao, M.; Lu, W. Catalytic Bromination of Alkyl sp<sup>3</sup>C-H Bonds with KBr/Air under Visible Light. *Org. Lett.* **2018**, 20, 17, 5264 – 5267.
5. (a.) Liang, S.; Hammond, G.; Xu, B. Metal-free regioselective hydrochlorination of unactivated alkenes via a combined acid catalytic system. *Green Chem.* **2018**, 20, 680 – 684.  
(b.) Liu, S.; Zhang, Q.; Tian, X.; Fan, S.; Huang, J.; Whiting, A. Highly selective halogenation of unactivated C(sp<sup>3</sup>)-H with NaX under co-catalysis of visible light and Ag@AgX. *Green Chem.* **2018**, 20, 4729 – 4737.
6. (a.) Kawahara, R.; Fujita, K-i.; Yamaguchi, R. Dehydrogenative Oxidation of Alcohols in Aqueous Media Using Water-Soluble and Reusable Cp\*Ir Catalysts Bearing a Functional Bipyridine Ligand. *J. Am. Chem. Soc.* **2012**, 134, 8, 3643 – 3646.  
(b.) Liu, C.; Li, T.; Dai, X.; Zhao, J.; He, D.; Li, G.; Wang, B.; Cui, X. Catalytic Activity Enhancement on Alcohol Dehydrogenation via Directing Reaction Pathways from Single- to Double-Atom Catalysis. *J. Am. Chem. Soc.* **2022**, 144, 11, 4913 – 4924.
7. Ardiansah, B.; Tanimoto, H.; Tomohiro, T.; Tsumoru, M.; Kakiuchi, K. Sulfonium ion-promoted traceless Schmidt reaction of alkyl azides. *Chem. Commun.* **2021**, 57, 8738 – 8741.
8. Li, H.; Shen, S-J.; Zhu, C-L.; Xu, H. Direct Intermolecular Anti-Markovnikov Hydroazidation of Unactivated Olefins. *J. Am. Chem. Soc.* **2019**, 141, 23, 9415 – 9421.
9. Albrecht, S.; Al-Lakkis-Wehbe, M.; Orsini, A.; Defoin, A.; Pale, P.; Salomon, E.; Tarnus, C.; Weibel, J-M. Amino-benzosuberone: A novel warhead for selective inhibition of human aminopeptidase-N/CD13. *Bioorg. Med. Chem.* **2011**, 19, 1434 – 1449.
10. (a.) Castrica, L.; Fringuelli, F.; Gregoli, L.; Pizzo, F.; Vaccaro, L. Amberlite IRA900N3 as a New

- Catalyst for the Azidation of  $\alpha,\beta$ -Unsaturated Ketones under Solvent-Free Conditions. *J. Org. Chem.* **2006**, 71, 9536 – 9539.
- (b.) Jiao, J.; Nguyen, L.; Patterson D.; Flowers, R. An Efficient and General Approach to  $\beta$ -Functionalized Ketones. *Org. Lett.* **2007**, 9, 7, 1323 – 1326.
11. (a.) Nyfeler, E.; Renaud, P. Decarboxylative Radical Azidation Using MPDOC and MMDOC Esters. *Org. Lett.* **2008**, 10, 5, 985 – 988.
- (b.) Kamijo, S.; Watanabea, M.; Kamijoa, K.; Taoa, K.; Murafujib, T. Synthesis of Aliphatic Azides by Photoinduced C(sp<sup>3</sup>)-H Azidation. *Synthesis*. **2016**, 48, 115 – 121.
12. (a.) Rabet, P.; Fumagalli, G.; Boyd, S.; Greaney, M. Benzylic C-H Azidation Using the Zhdankin Reagent and a Copper Photoredox Catalyst. *Org. Lett.* **2016**, 18, 1646 – 1649.
- (b.) Singh, A.; Harjinder, S.; Khurana, J. Recyclable zinc (II) ionic liquid catalyzed synthesis of azides by direct azidation of alcohols using trimethylsilylazide at room temperature. *Tetrahedron Lett.* **2017**, 58, 2498 – 2502.
- (c.) Chen, Y.; He, R.; Song, H.; Yu, G.; Li, C.; Liu, Y.; Wang, Q. Two-Step Protocol for Iodotrimethylsilane-Mediated Deoxy-Functionalization of Alcohols. *Eur. J. Org. Chem.* **2021**, 1179 – 1183.
13. Huang, X.; Bergsten, T.; Groves, J. Manganese-Catalyzed Late-Stage Aliphatic C-H Azidation. *J. Am. Chem. Soc.* **2015**, 137, 16, 5300 – 5303.
14. Li, X.; Song, J-N.; Karmakar, S.; Lu, Y.; Lv, Ye.; Liao, P.; Liu, Z. Transition-metal-free azide insertion of *N*-triftosylhydrazones using a non-metallic azide source. *Chem. Commun.*, **2022**, 58, 13783 – 13786.
15. Lamani, M.; Devadiga, P.; Prabhu, K. A non-metal catalysed oxidation of primary azides to nitriles at ambient temperature. *Org. Biomol. Chem.* **2012**, 10, 2753 – 2759.
16. Dryzhakov, M.; Hellal, M.; Wolf, E.; Falk, F.; Moran, J. Nitro-Assisted Brønsted Acid Catalysis: Application to a Challenging Catalytic Azidation. *J. Am. Chem. Soc.* **2015**, 137, 30, 9555 – 9558.
17. Gao, F.; Bai, R.; Li, M.; Gu, Y. Dipolar HCP materials as alternatives to DMF solvent for azide-based synthesis. *Green Chem.* **2021**, 23, 7499 – 7505.
18. Zhang, X.; Yang, H.; Tang, P. Transition-Metal-Free Oxidative Aliphatic C-H Azidation. *Org. Lett.* **2015**, 17, 23, 5828 – 5831.
19. Davis, C.; Johnson, R.; Cialdella, J.; Liggett, W.; Mizesak, S.; Han, F.; Marshal, V. Microbiological Oxygenation of 1-Azidoadamantane and of *N*-Benzoyl-3-noradamantanamine. *J. Org. Chem.* **1997**, 62, 2252 – 2254.
20. Liu, C.; Wang, X.; Li, Z.; Cui, L.; Li, C. Silver-Catalyzed Decarboxylative Radical Azidation of Aliphatic Carboxylic Acids in Aqueous Solution. *J. Am. Chem. Soc.* **2015**, 137, 9820 – 9823.
21. Himo, F.; Lovell, T.; Hilgraf, R.; Rostovtsev, V.; Noodleman, L.; Sharpless, B.; Fokin, V. Copper(I)-Catalyzed Synthesis of Azoles. DFT Study Predicts Unprecedented Reactivity and Intermediates. *J. Am. Chem. Soc.* **2005**, 127, 1, 210 – 216.
